# Supplementary material for: The generation of detergent-insoluble clipped fragments from an ERAD substrate in mammalian cells
Source: Springer Nature journal article supplement (doi:10.1038/s41598-023-48769-z), 2023-12-06

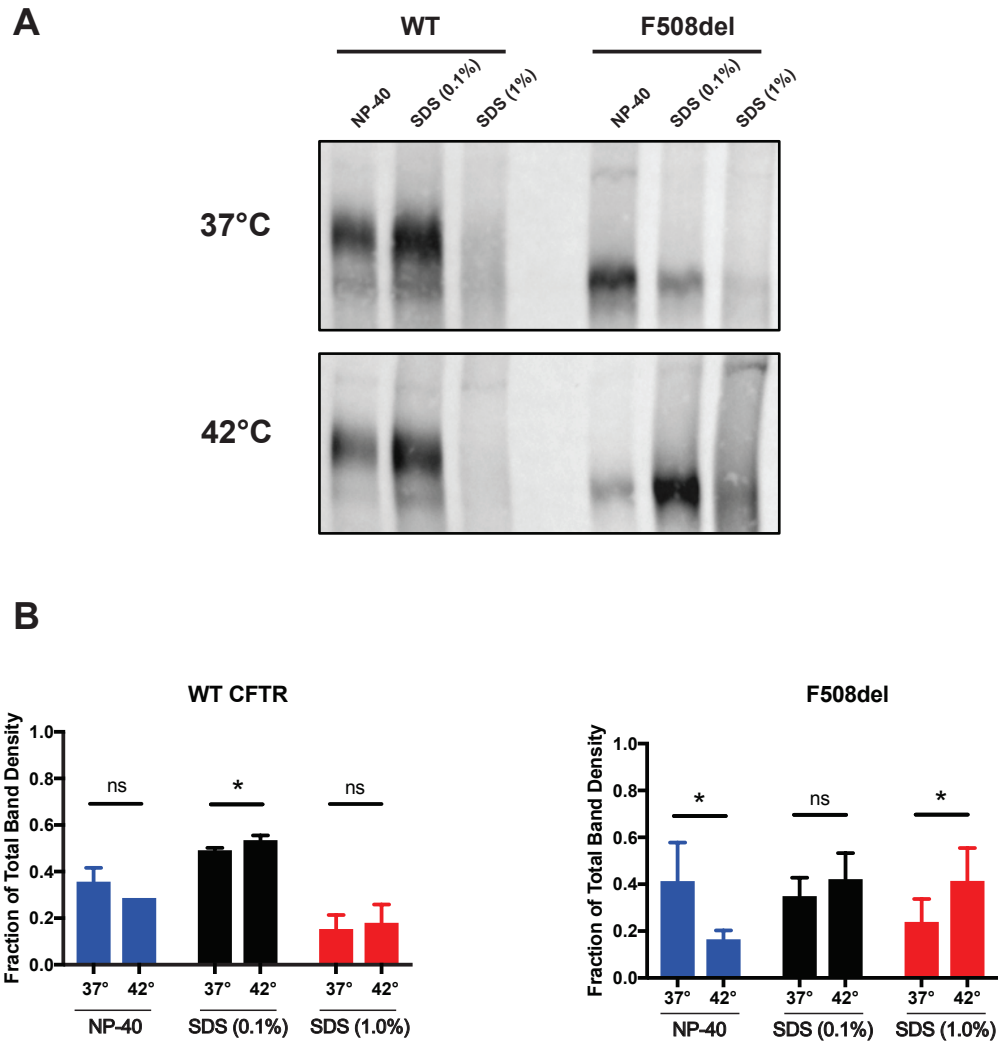

**Figure S1.** (A) HEK293 cells expressing either wild type or F508del CFTR at 37°C or after a 1 hour shift to 42°C were sequentially lysed and pelleted in the labeled detergents. (B) Quantification of the data in panel A; n=4, \* = p<0.05

**A**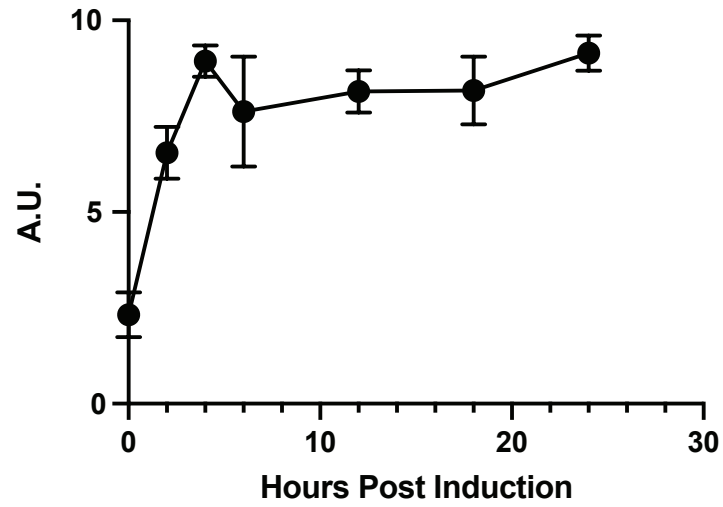**B**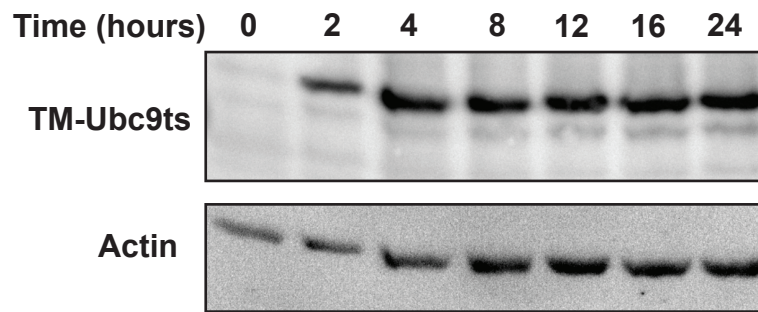

**Figure S2.** Time dependent induction of TM-Ubc9ts in a tetracycline-inducible expression system in HEK293 cells. A total of 1  $\mu$ g/ml tetracycline was added for the designated time prior to cell lysis and western blot. (A) Protein levels were normalized to actin;  $n = 3$ ,  $\pm$  SEM. (B) A representative western blot of the time course is shown.

**Figure S3.** The following pages depict the full blots and exposures from which segments were cropped to be used in the indicated main figures in this paper. In each panel, a box indicates the cropped portion used in the corresponding figure. Loading controls include both those that were probed on the same gel in which specific images are shown or were from the same samples that were examined later.

Figure 2: anti-HA (TM-Ubc9ts)

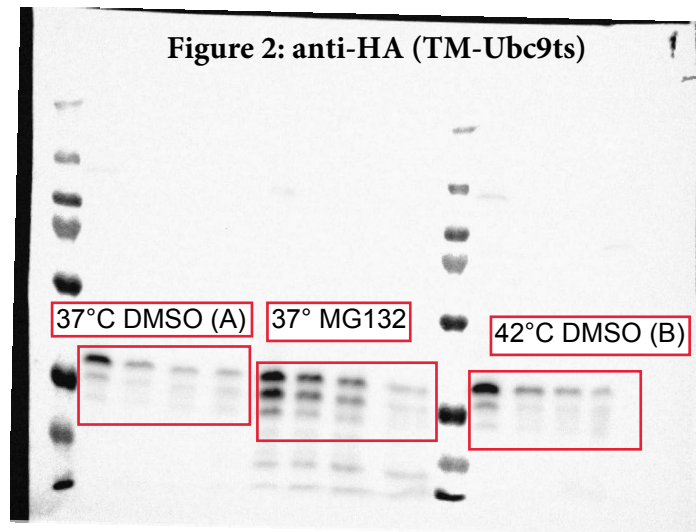

Figure 2: anti-HA (TM-Ubc9ts)

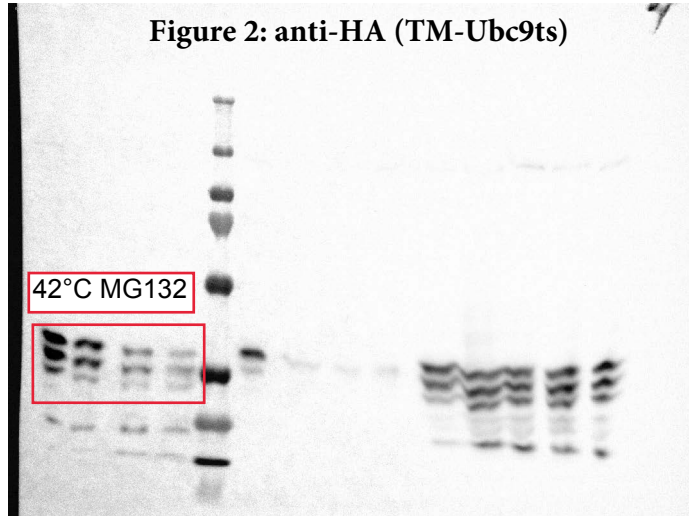

**Figure 2: anti-HA (TM-Ubc9ts)**

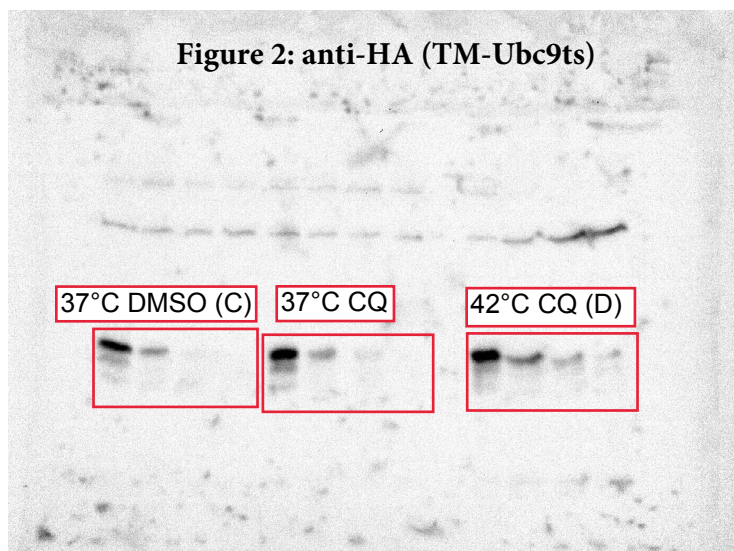

**Figure 2: anti-HA (TM-Ubc9ts)**

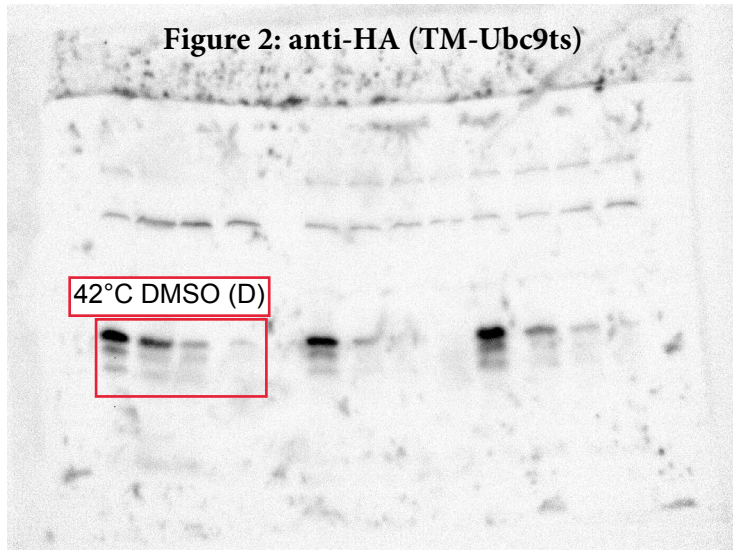

Figure 2  
37 and 42°C DMSO and MG132  
(A,B)

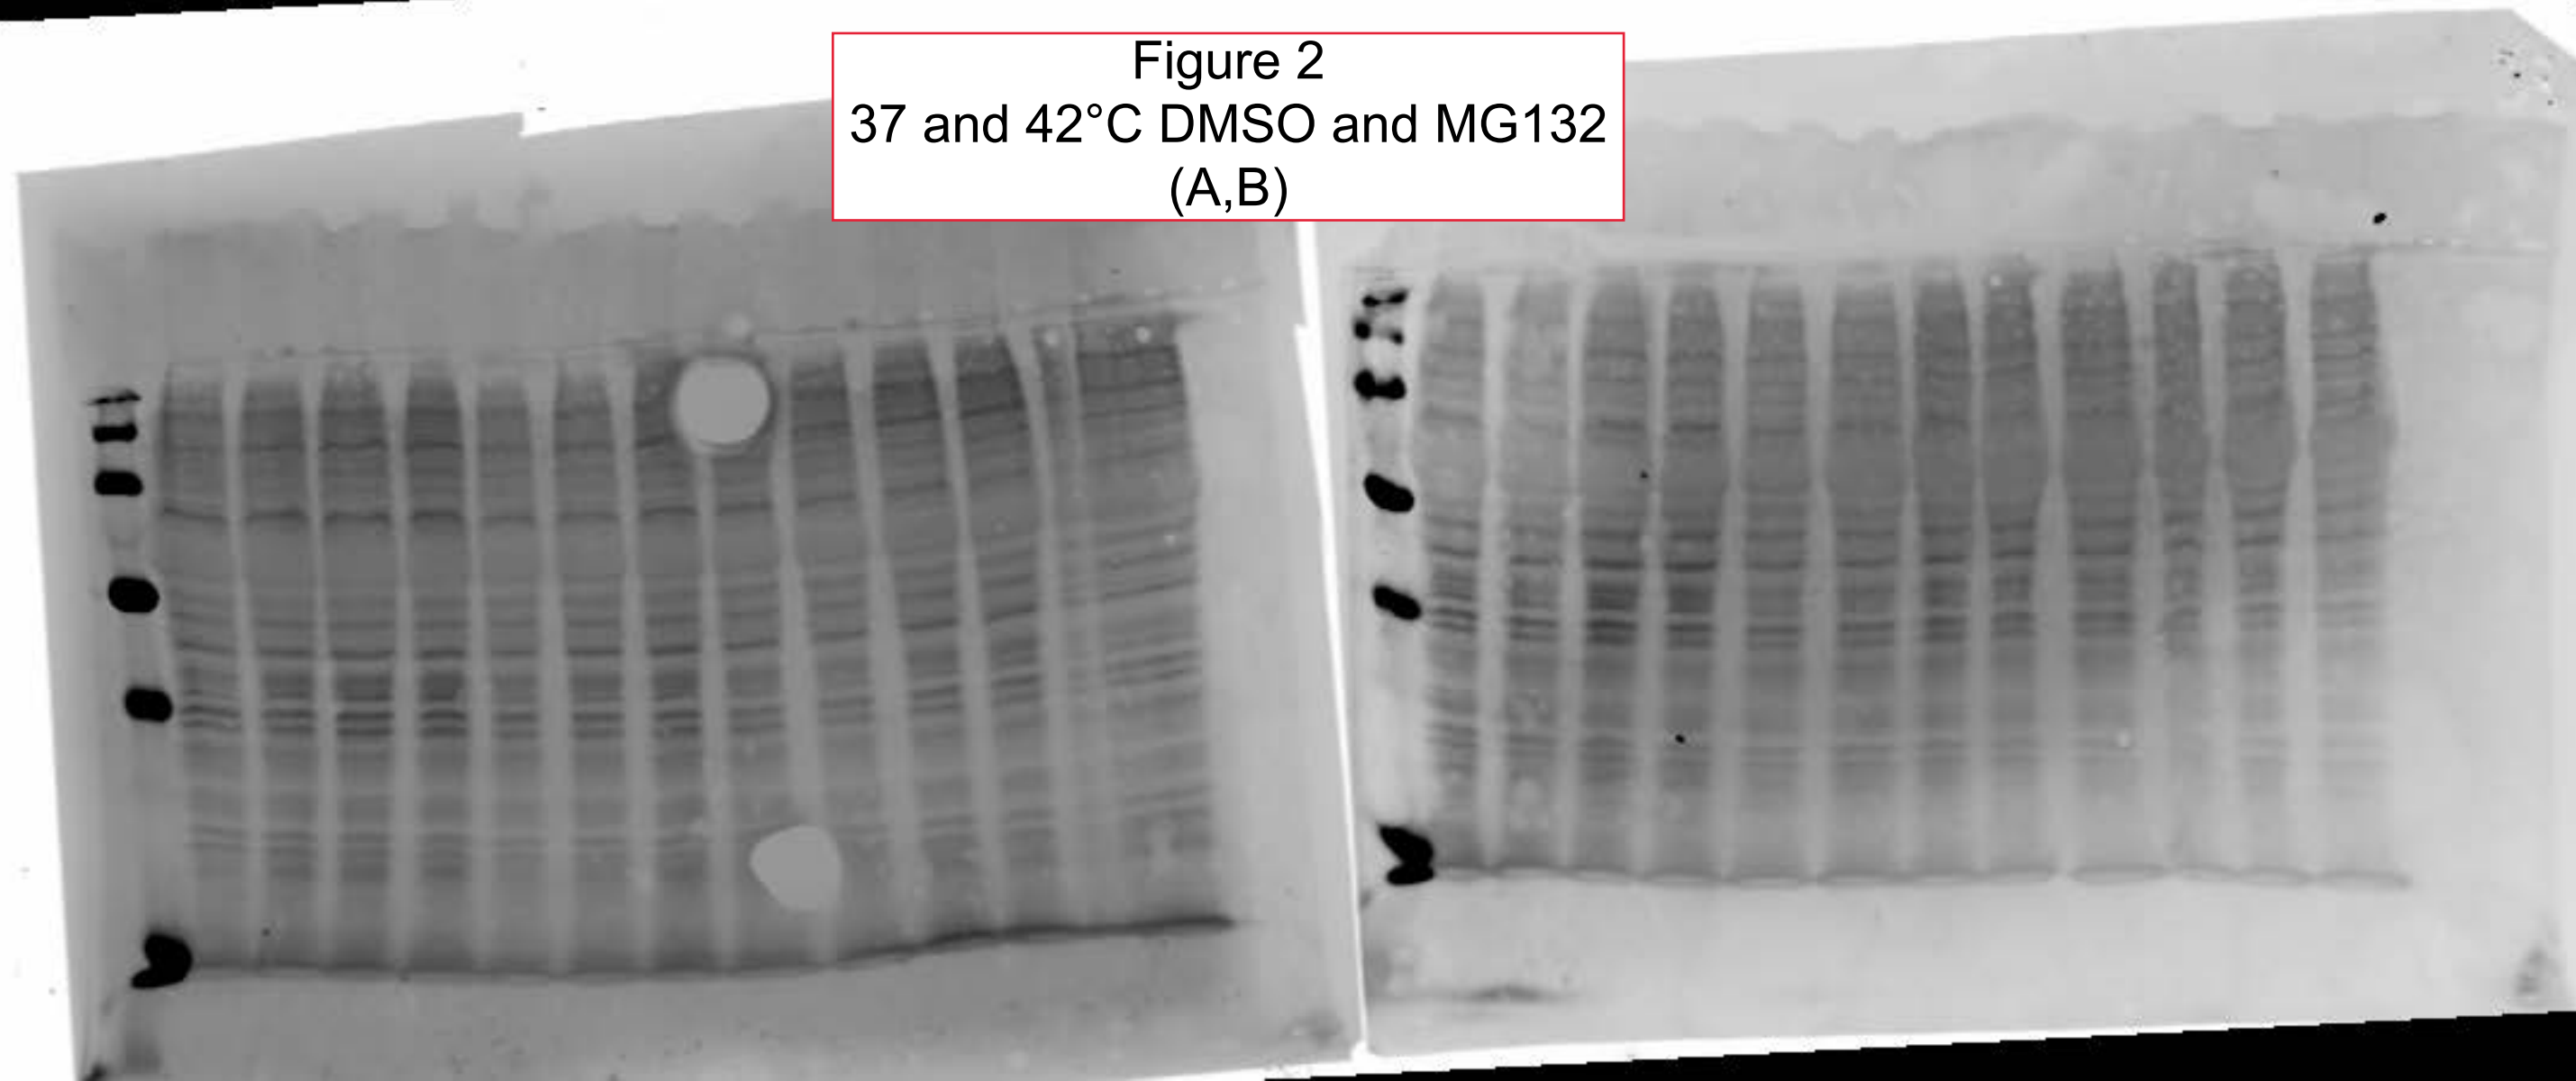



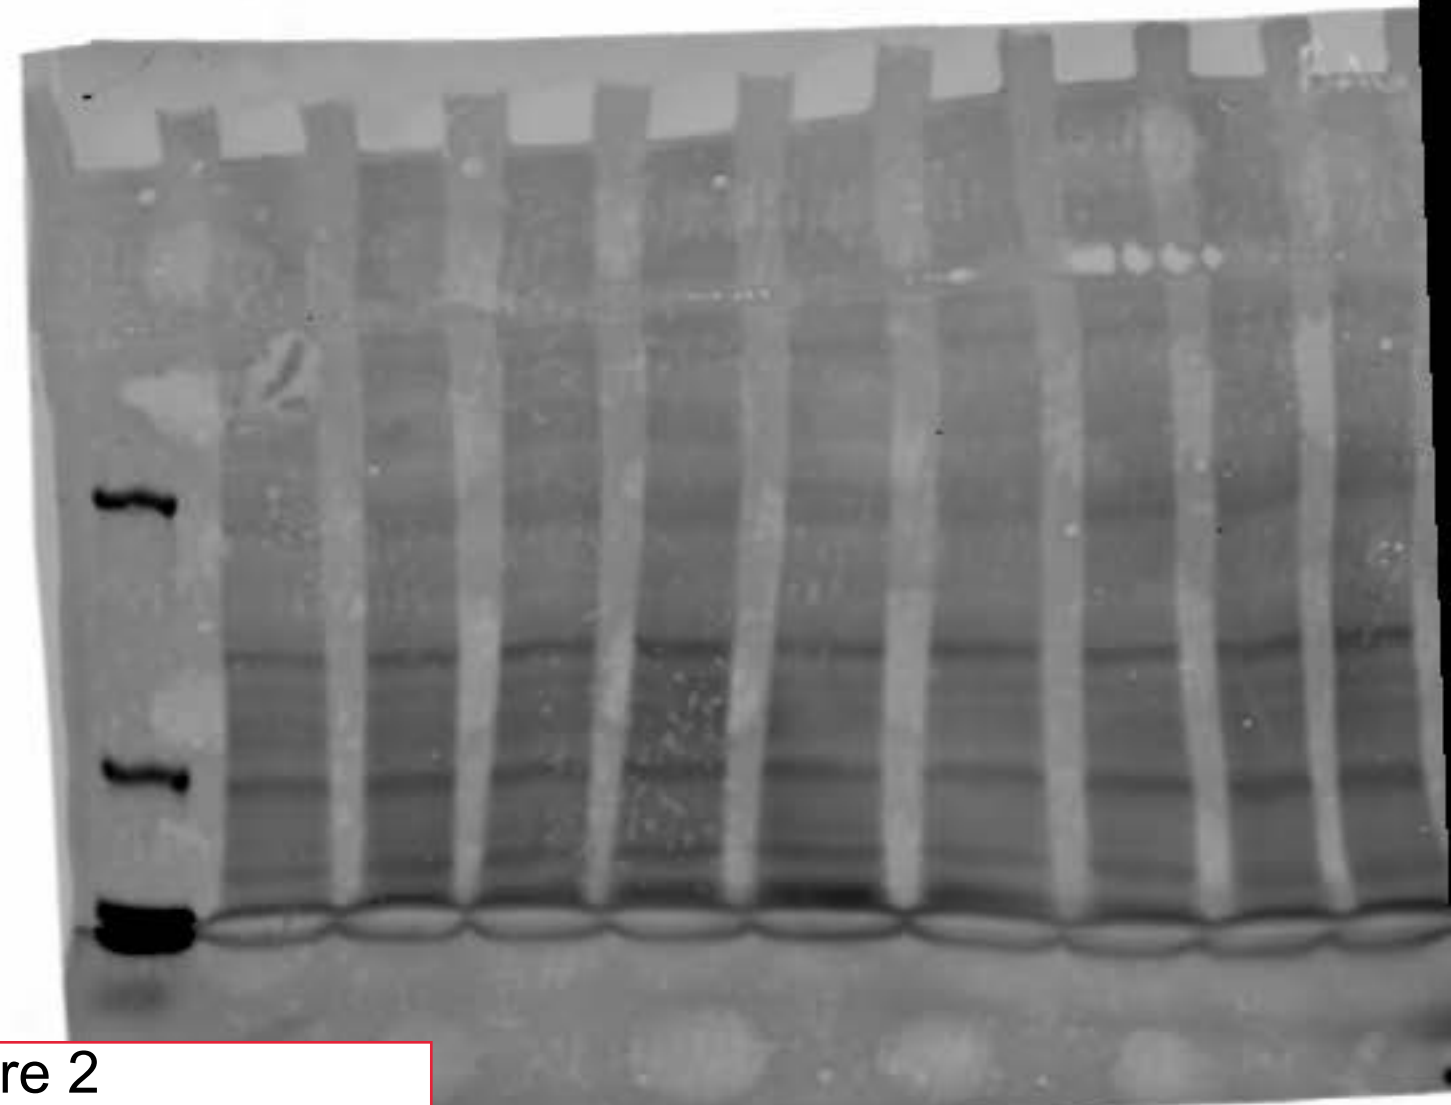

Figure 2  
37 and 42°C DMSO and CQ  
(C,D)

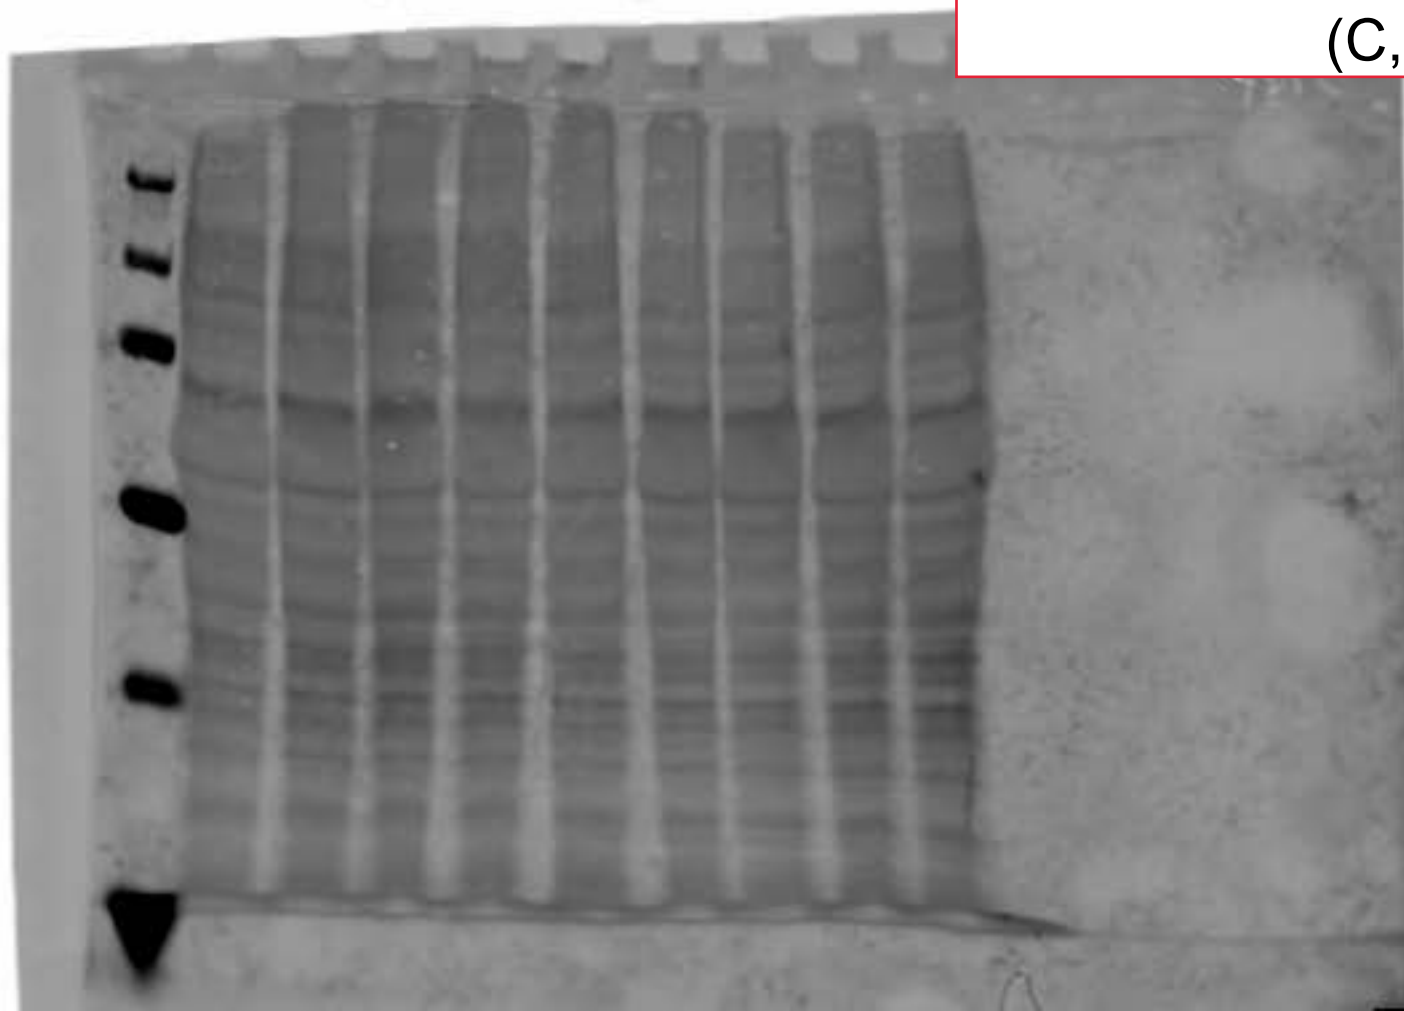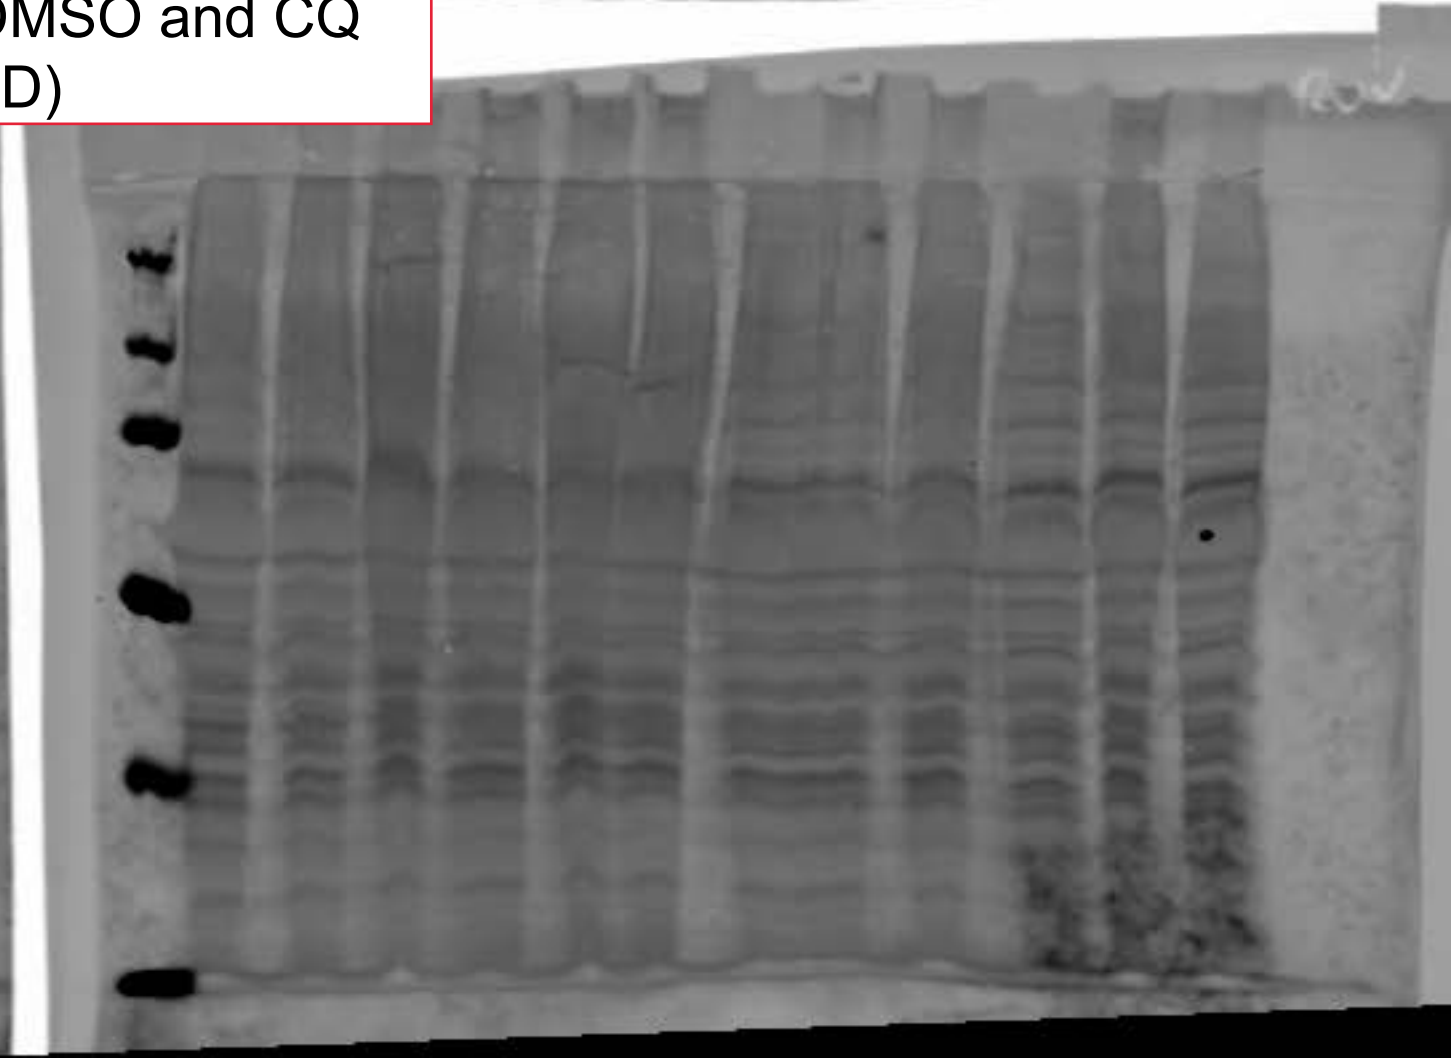

Figure 3: anti-HA (TM-Ubc9ts)

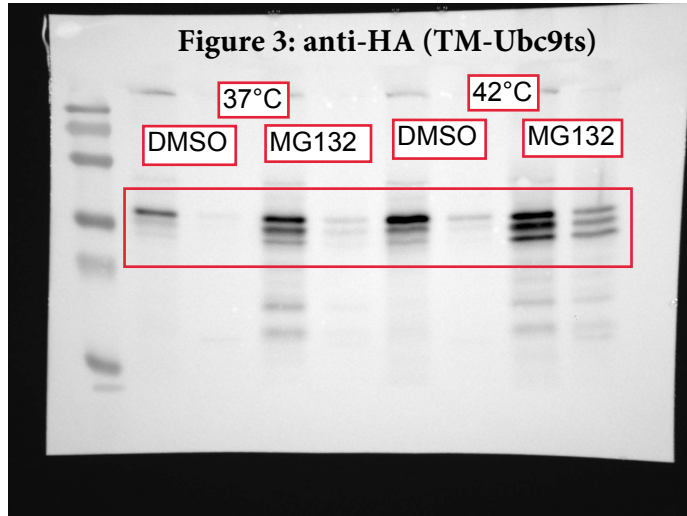

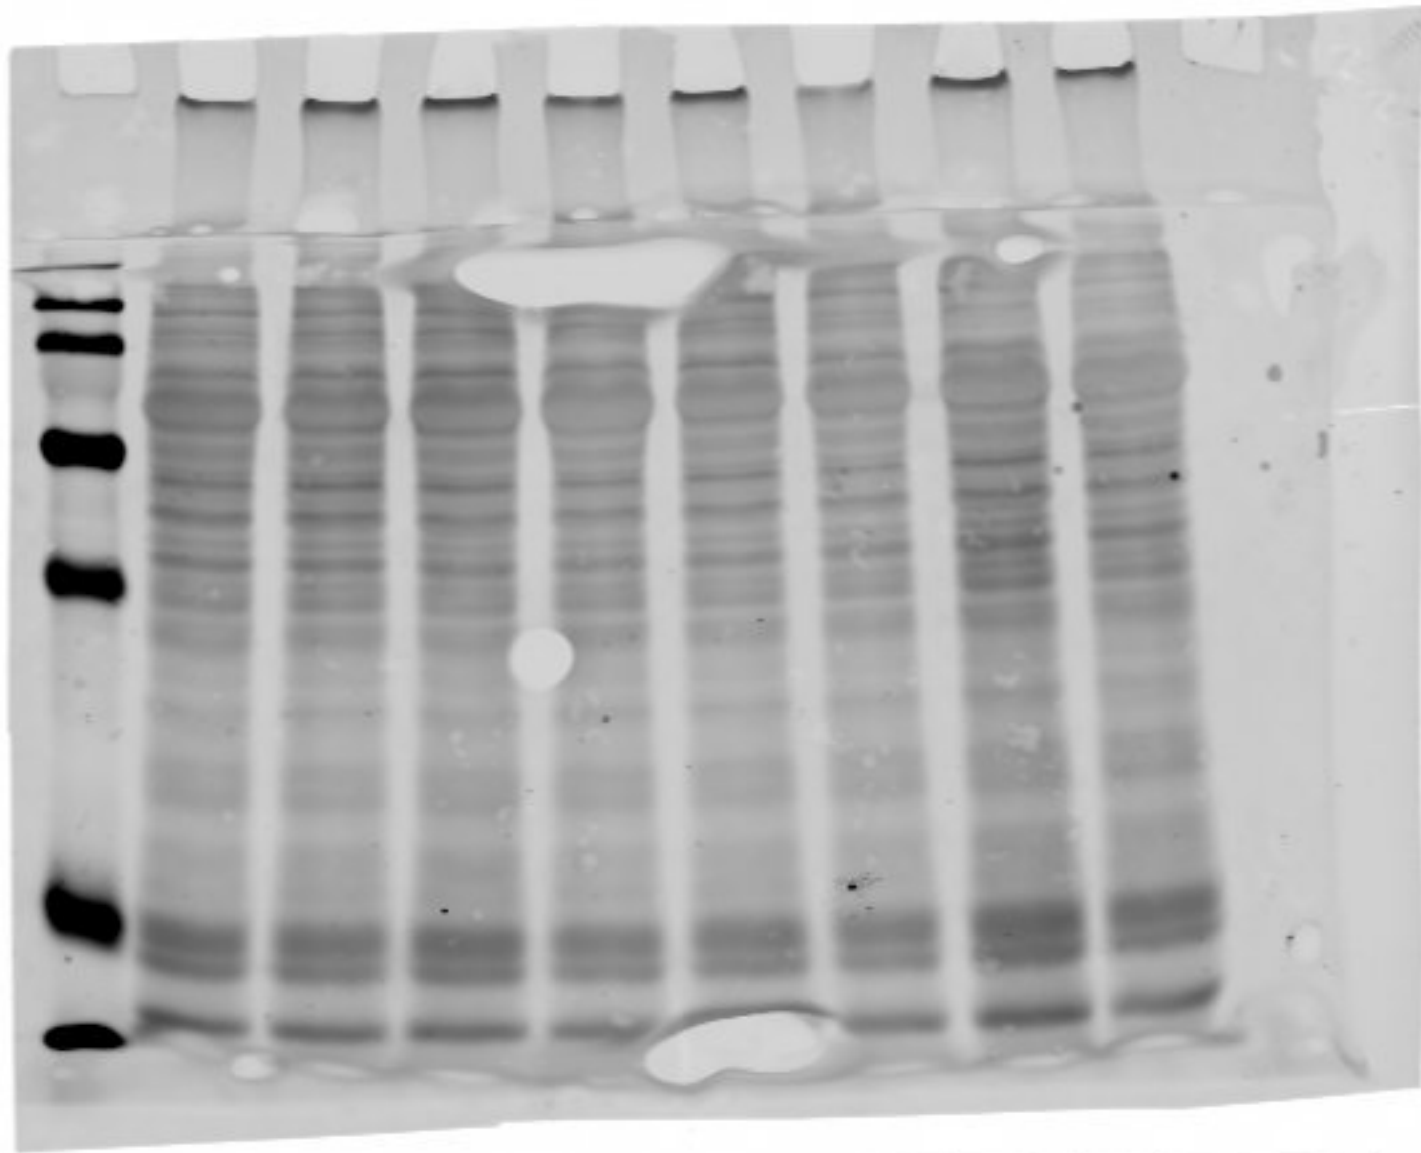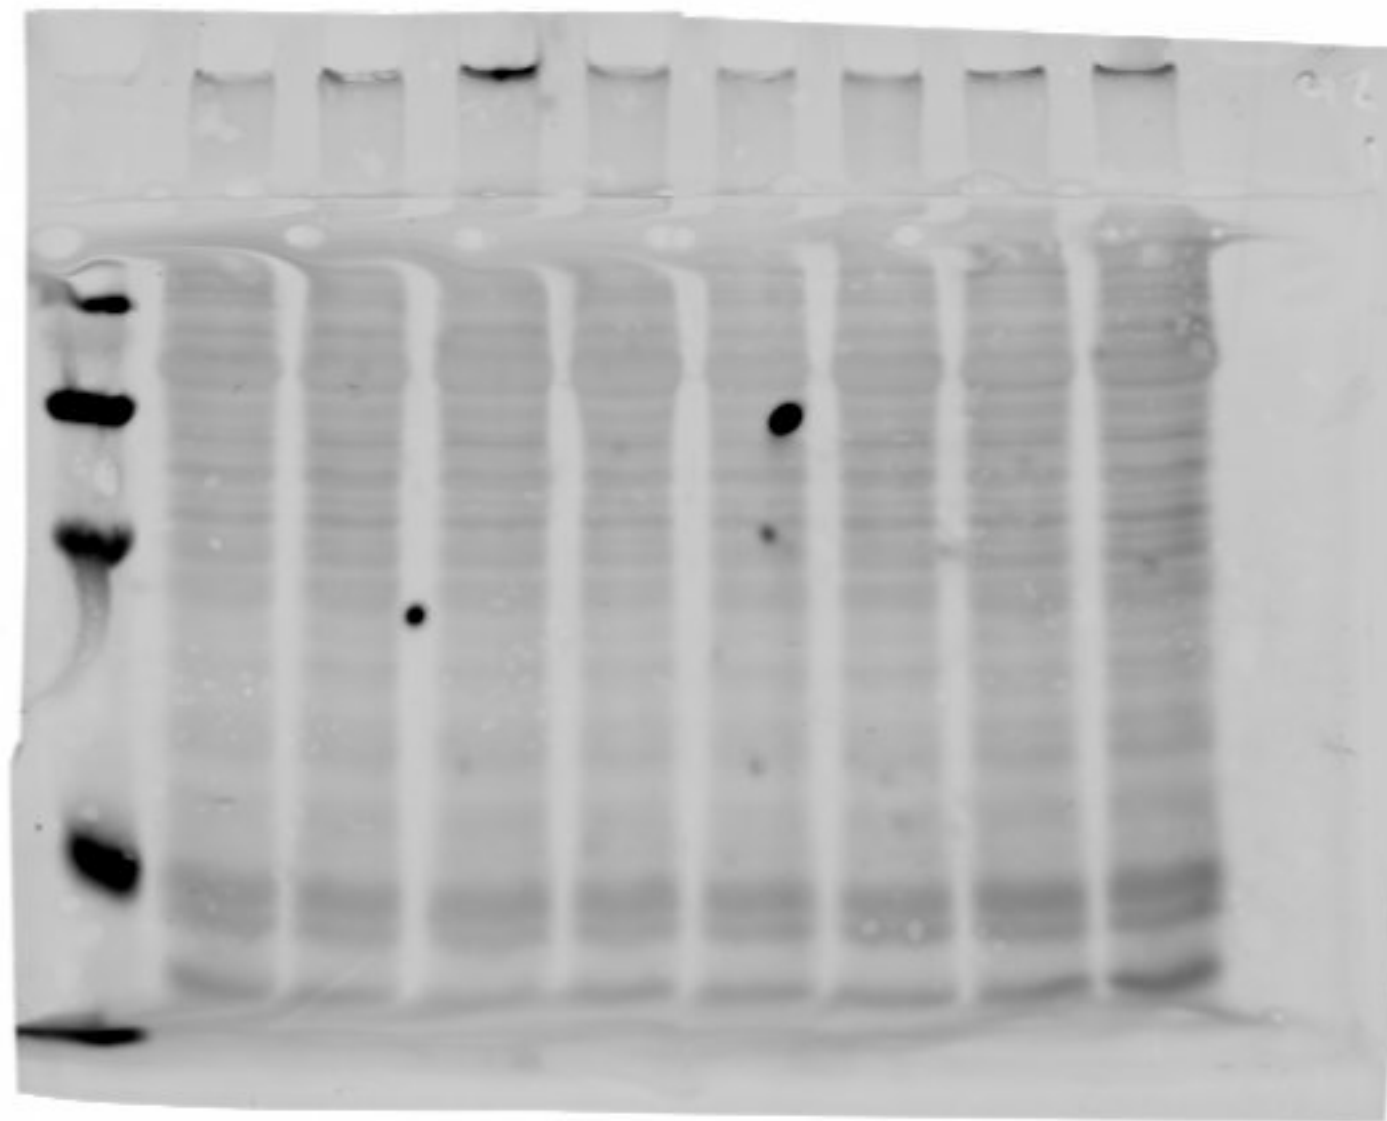

Figure 3  
Total Protein (A)

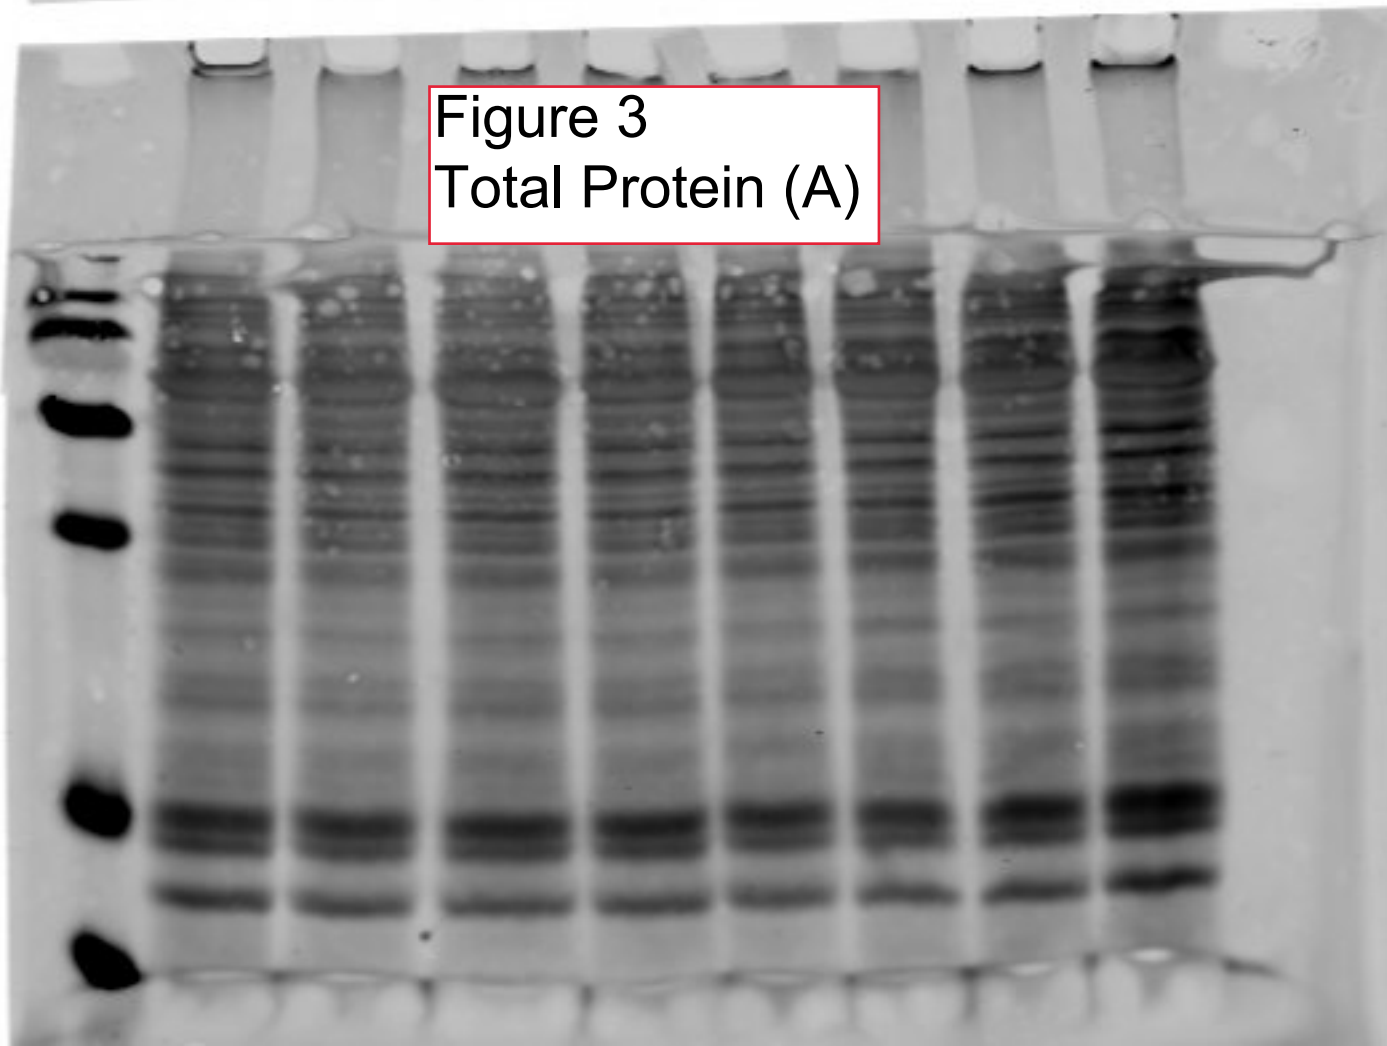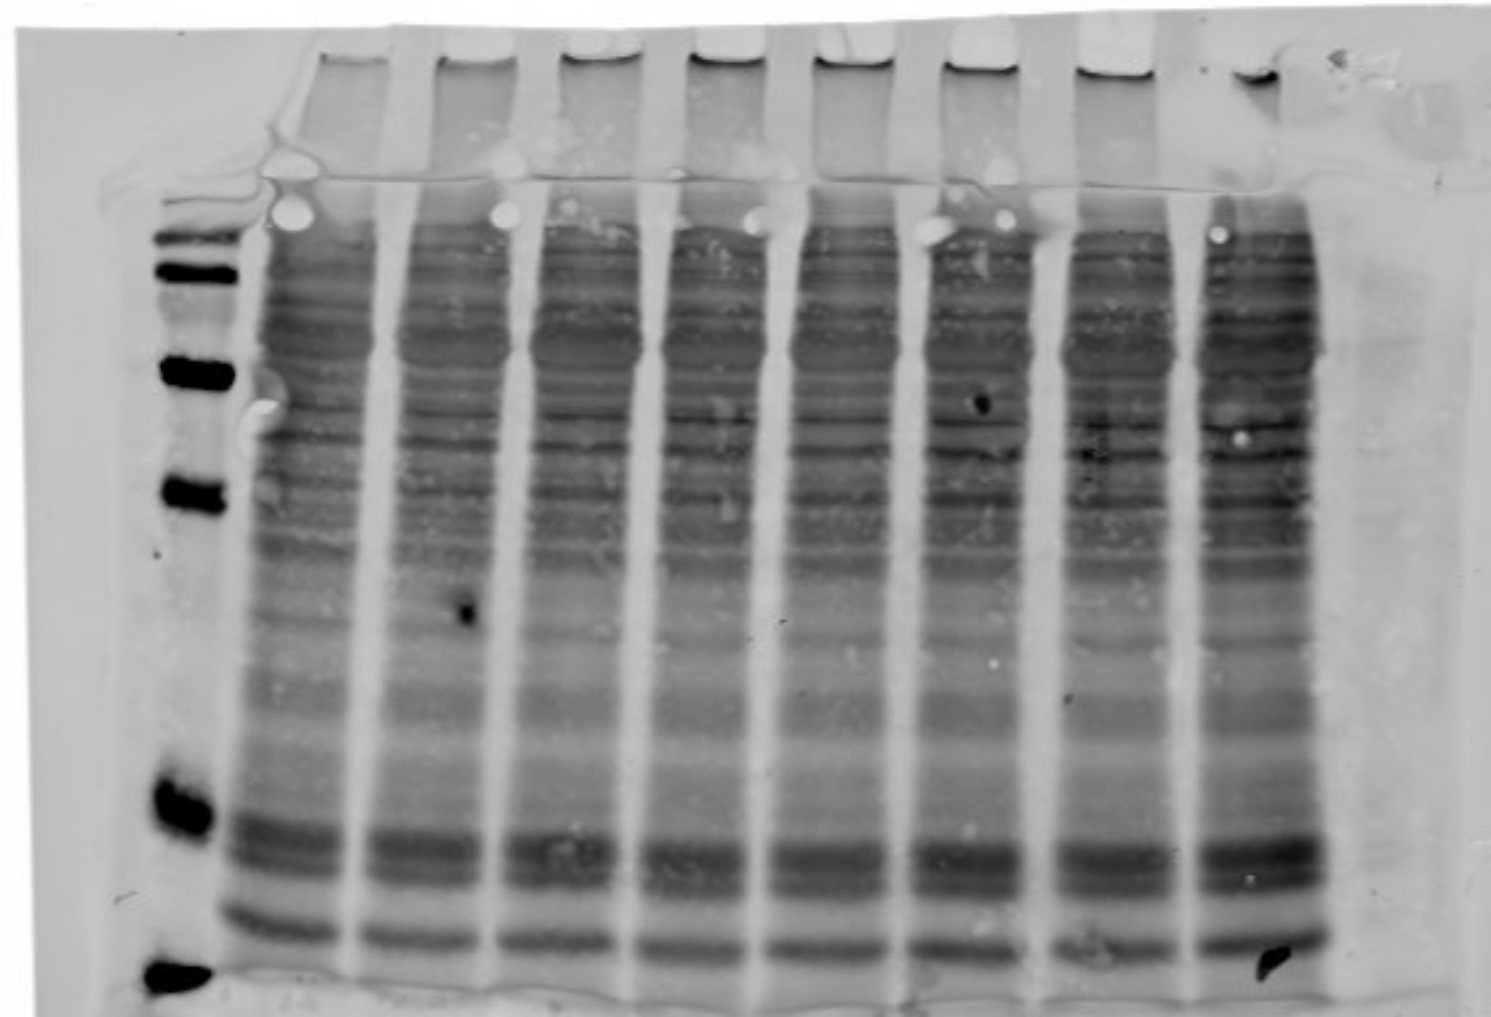

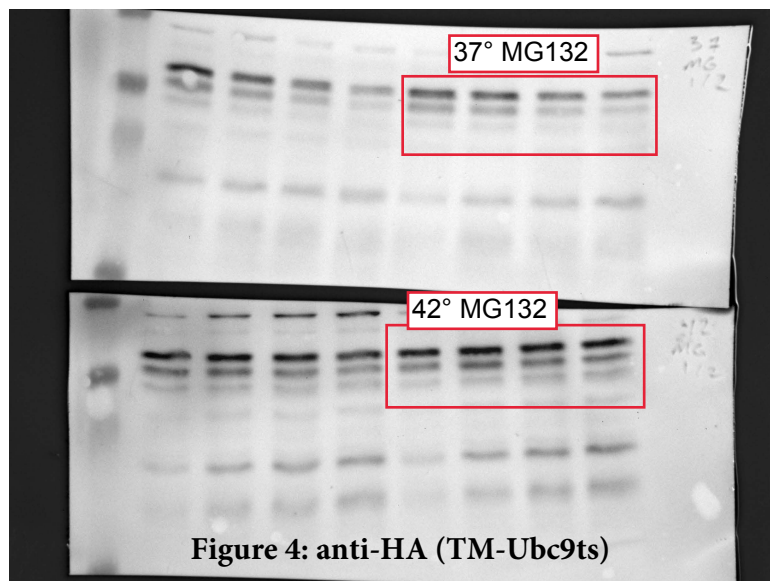

Figure 4: anti-HA (TM-Ubc9ts)

Figure 4: anti-HA (TM-Ubc9ts)

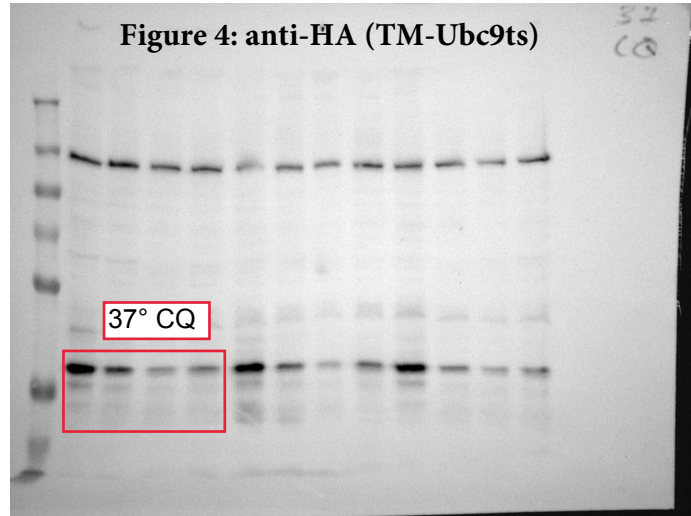

Figure 4: anti-HA (TM-Ubc9ts)

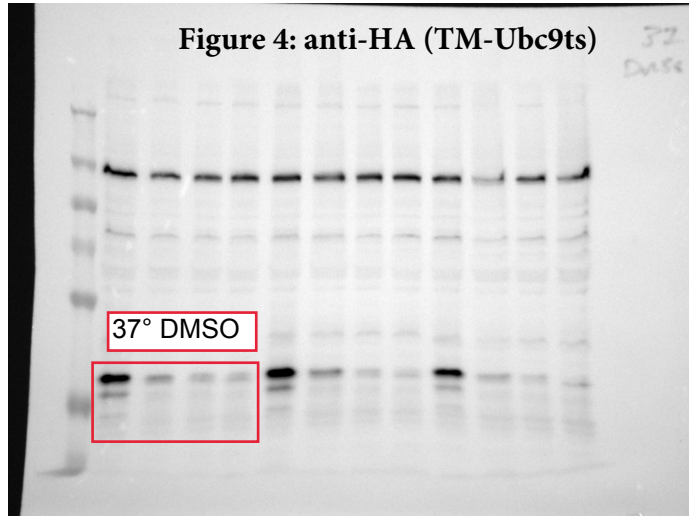

Figure 4: anti-HA (TM-Ubc9ts)

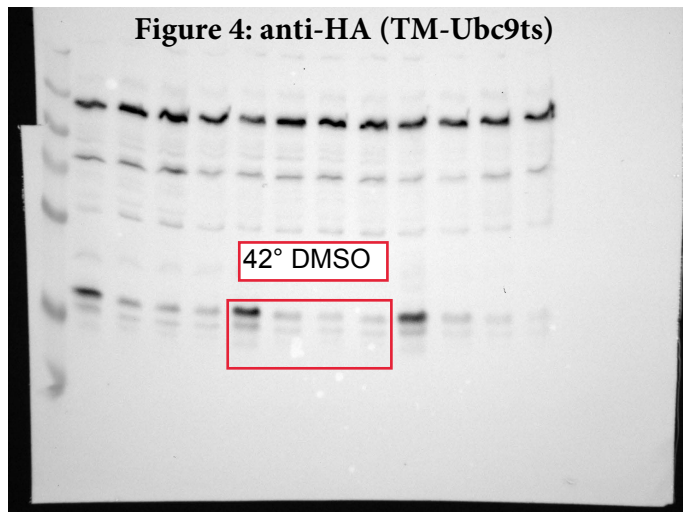

Figure 4: anti-HA (TM-Ubc9ts)

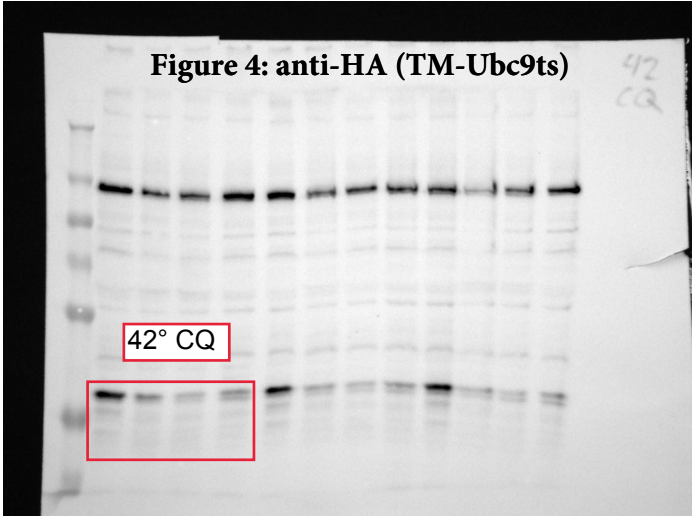



Figure 4: anti-HA (TM-Ubc9ts)

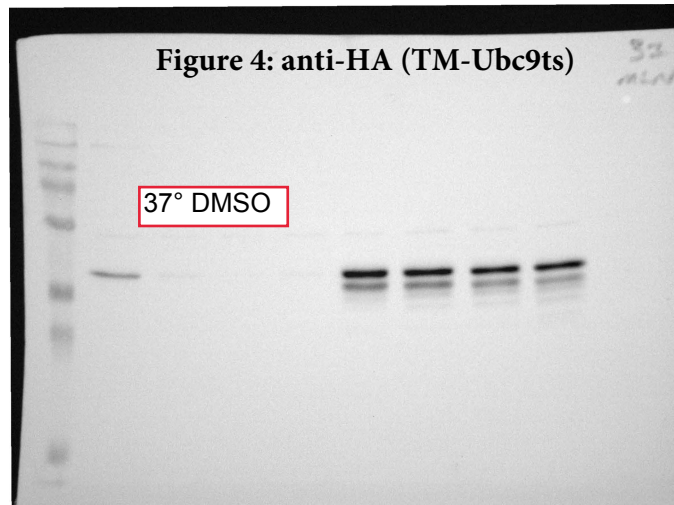

**Figure 4: anti-HA (TM-Ubc9ts)**

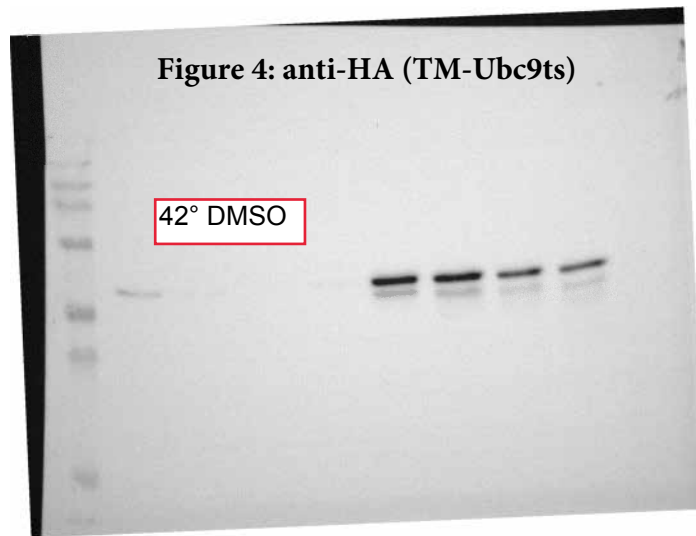

**Figure 4: anti-HA (TM-Ubc9ts)**

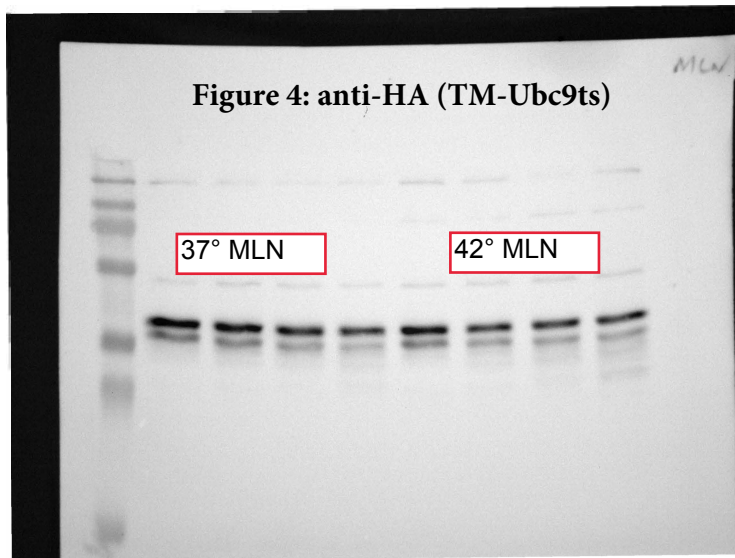

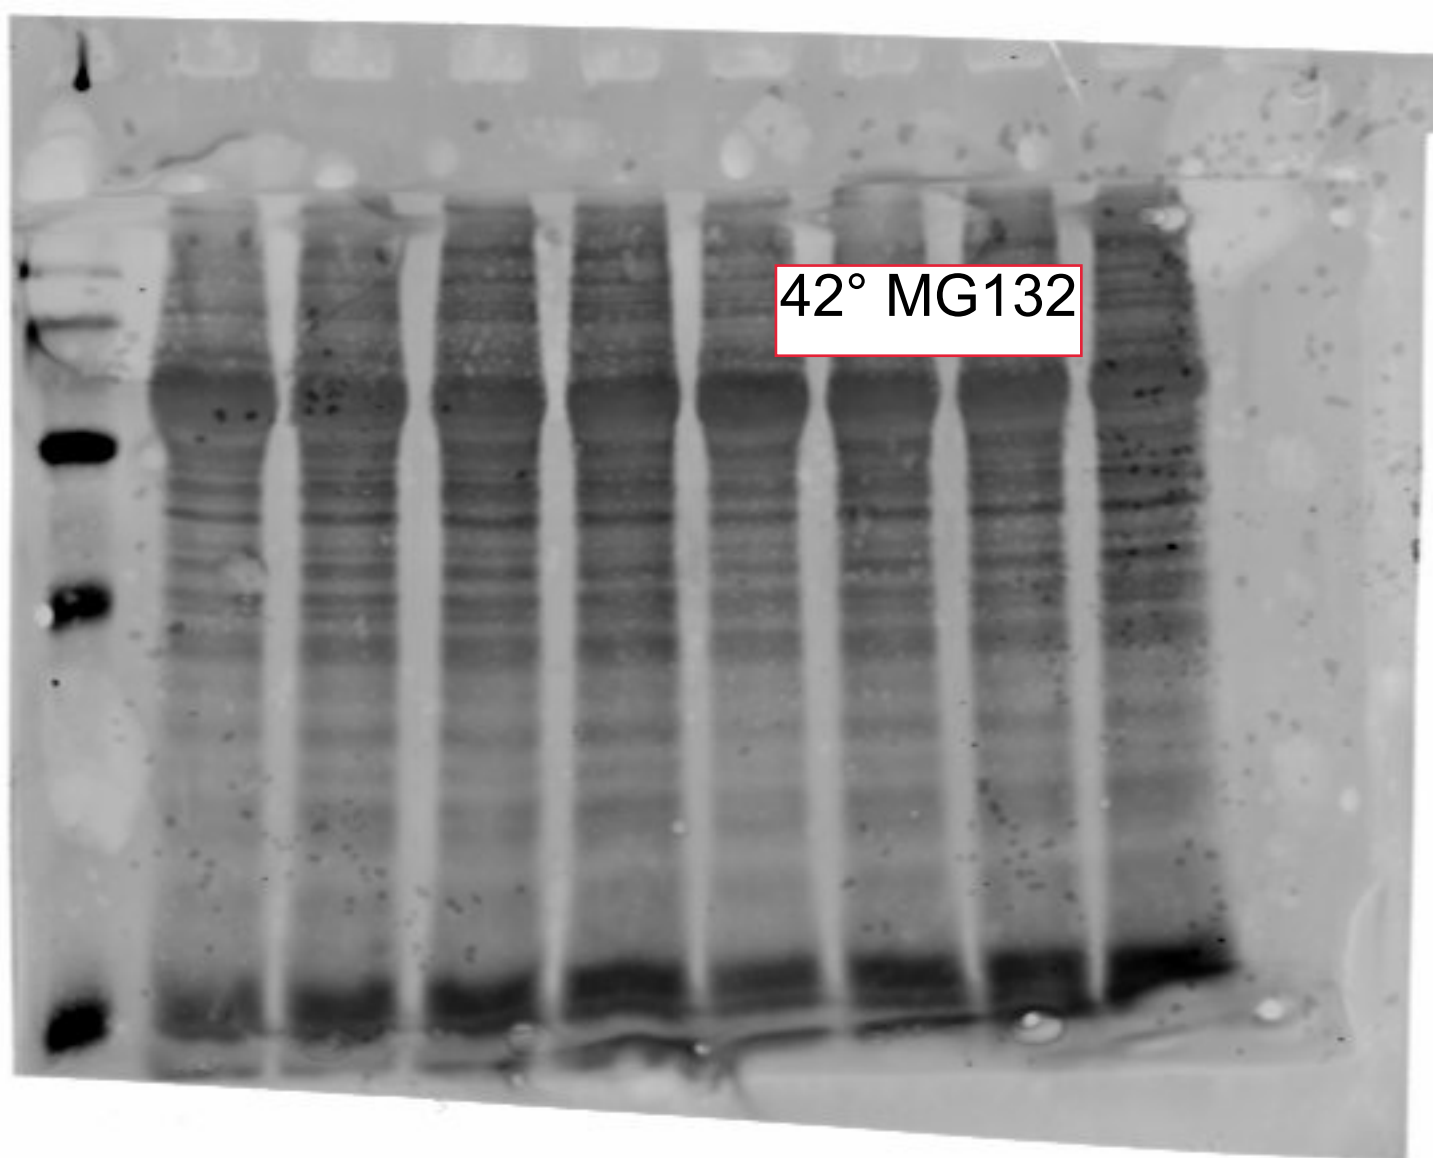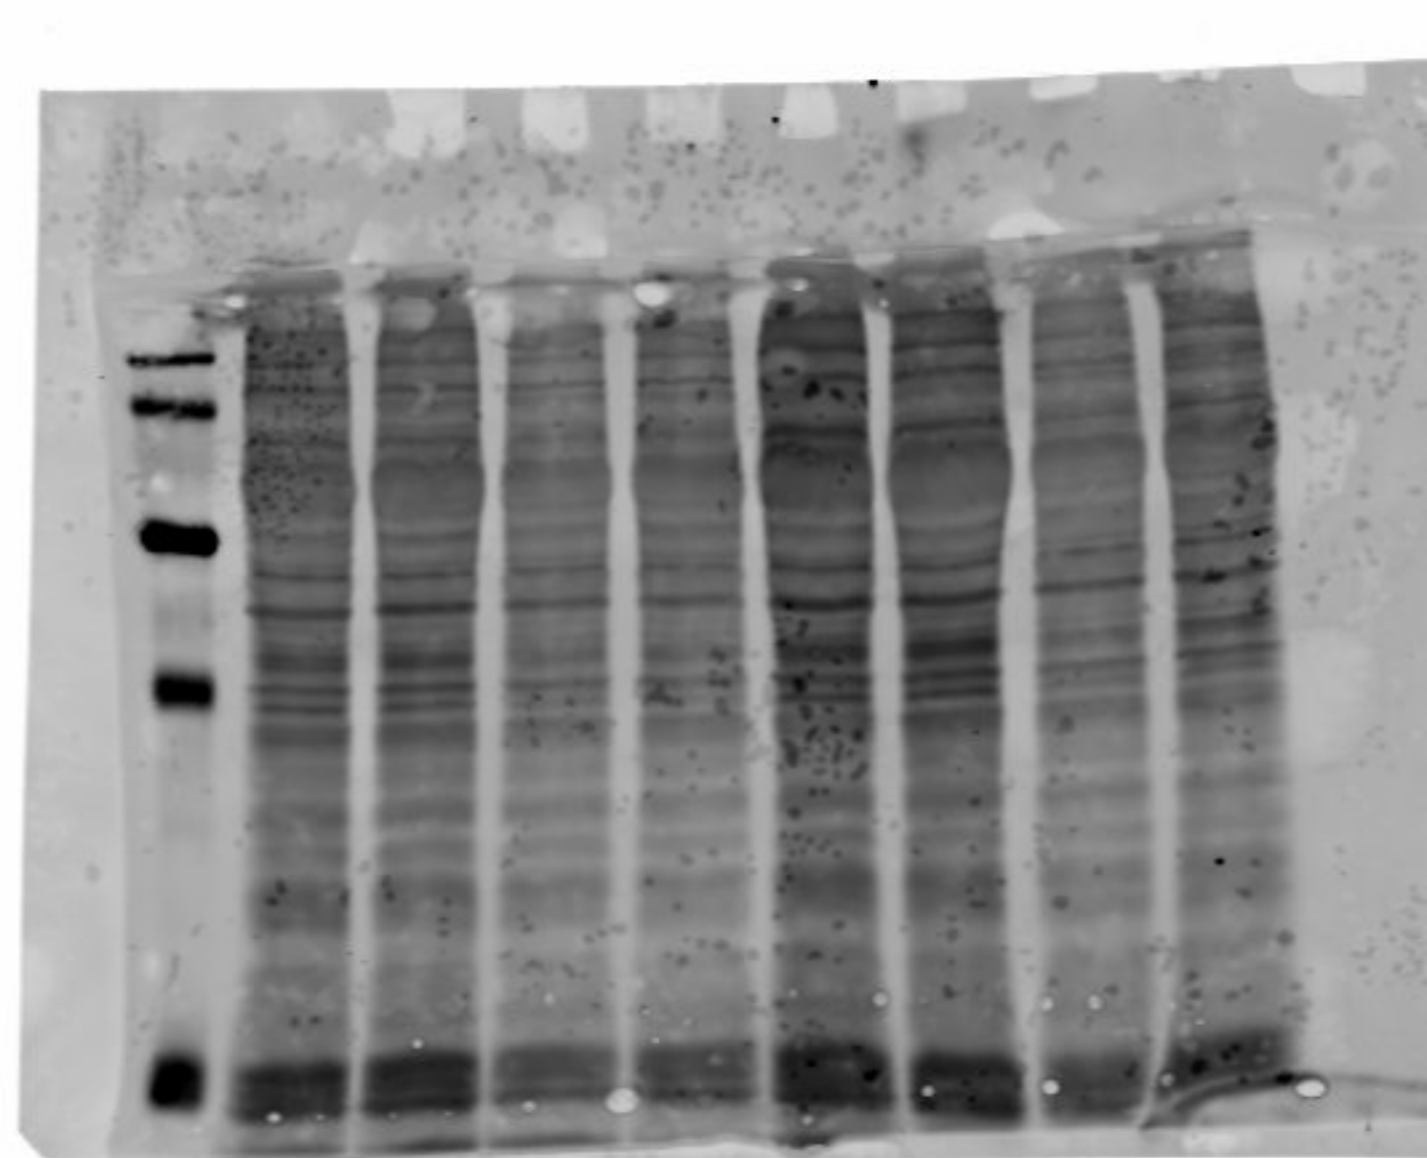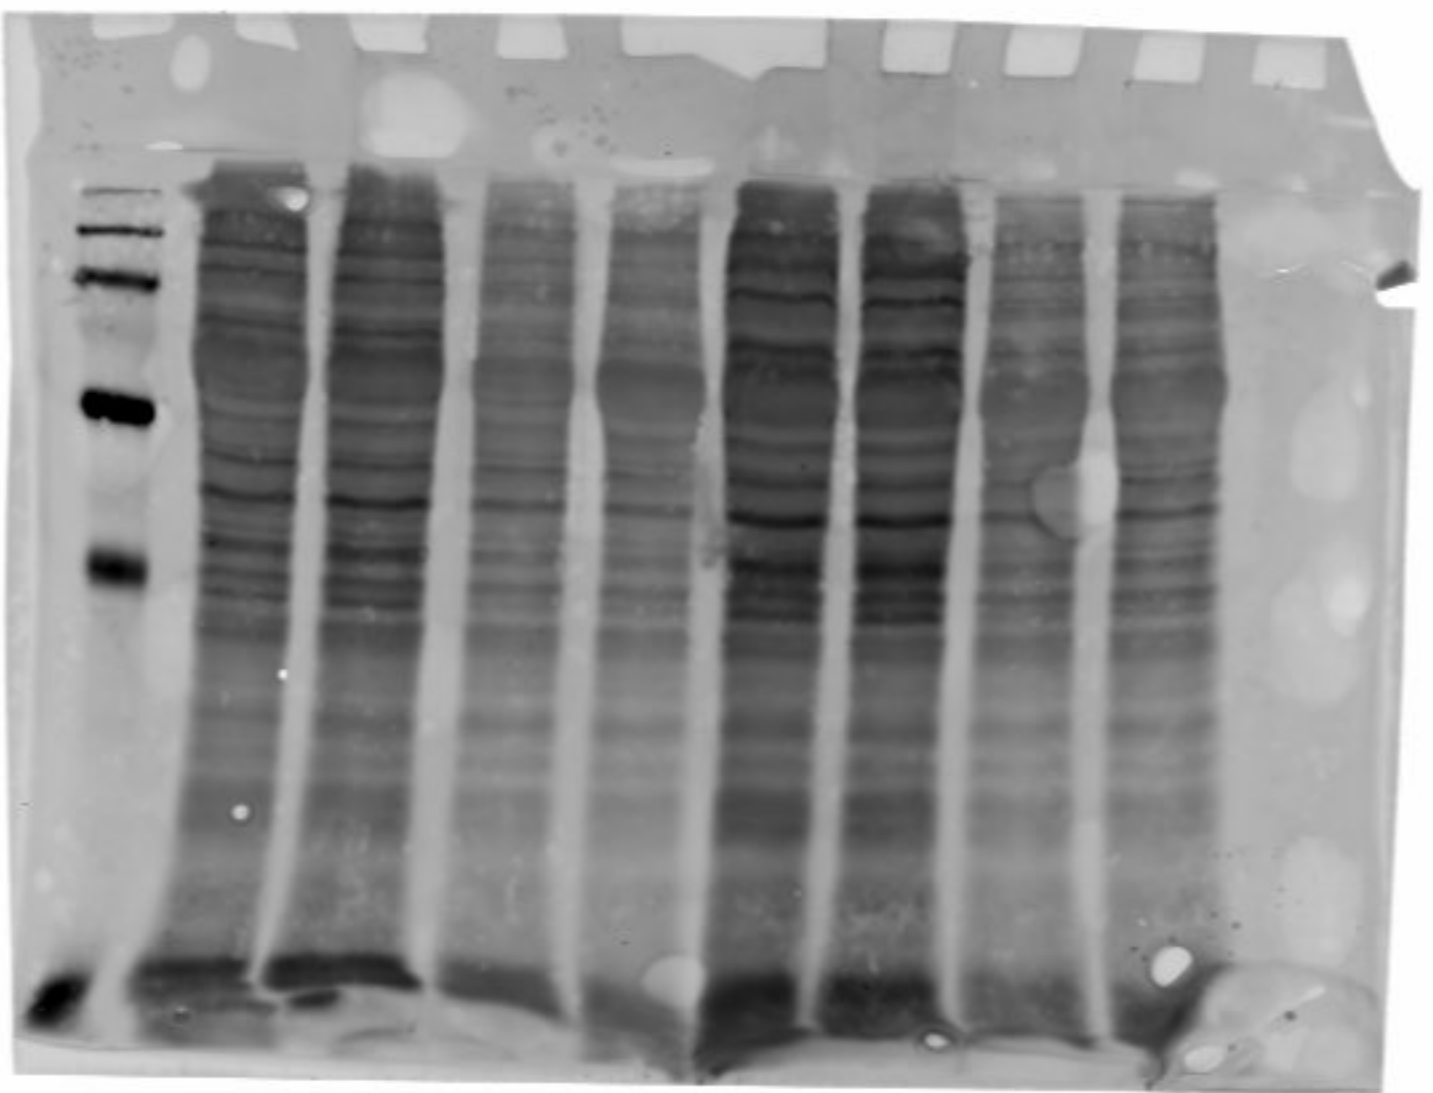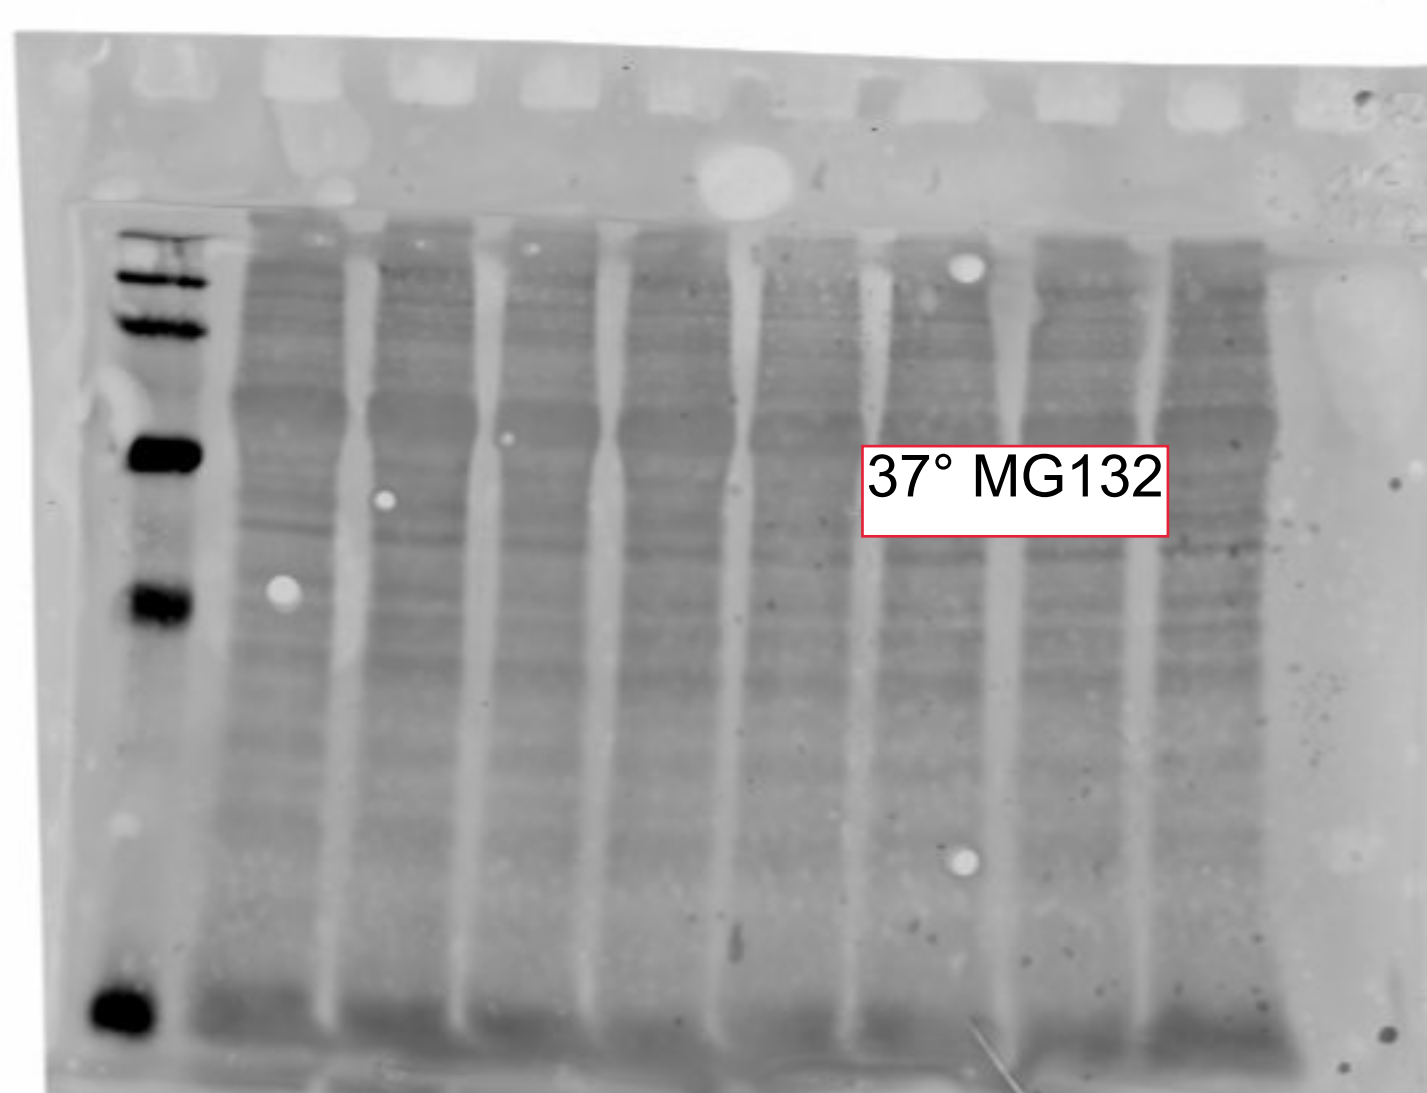

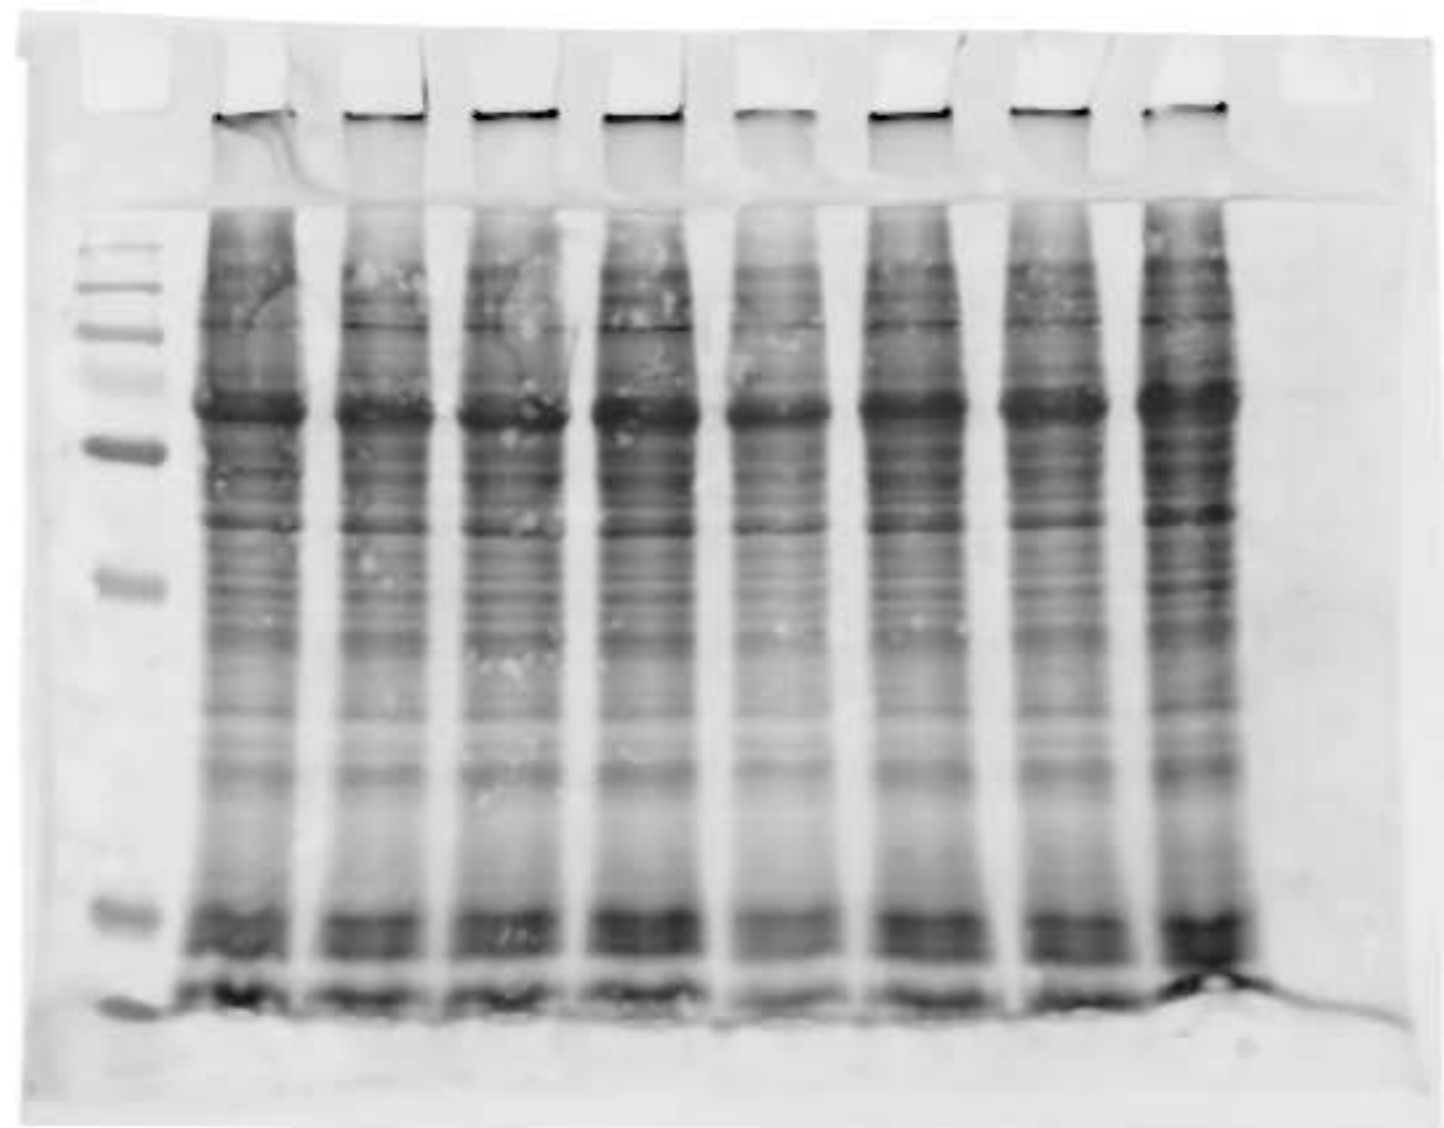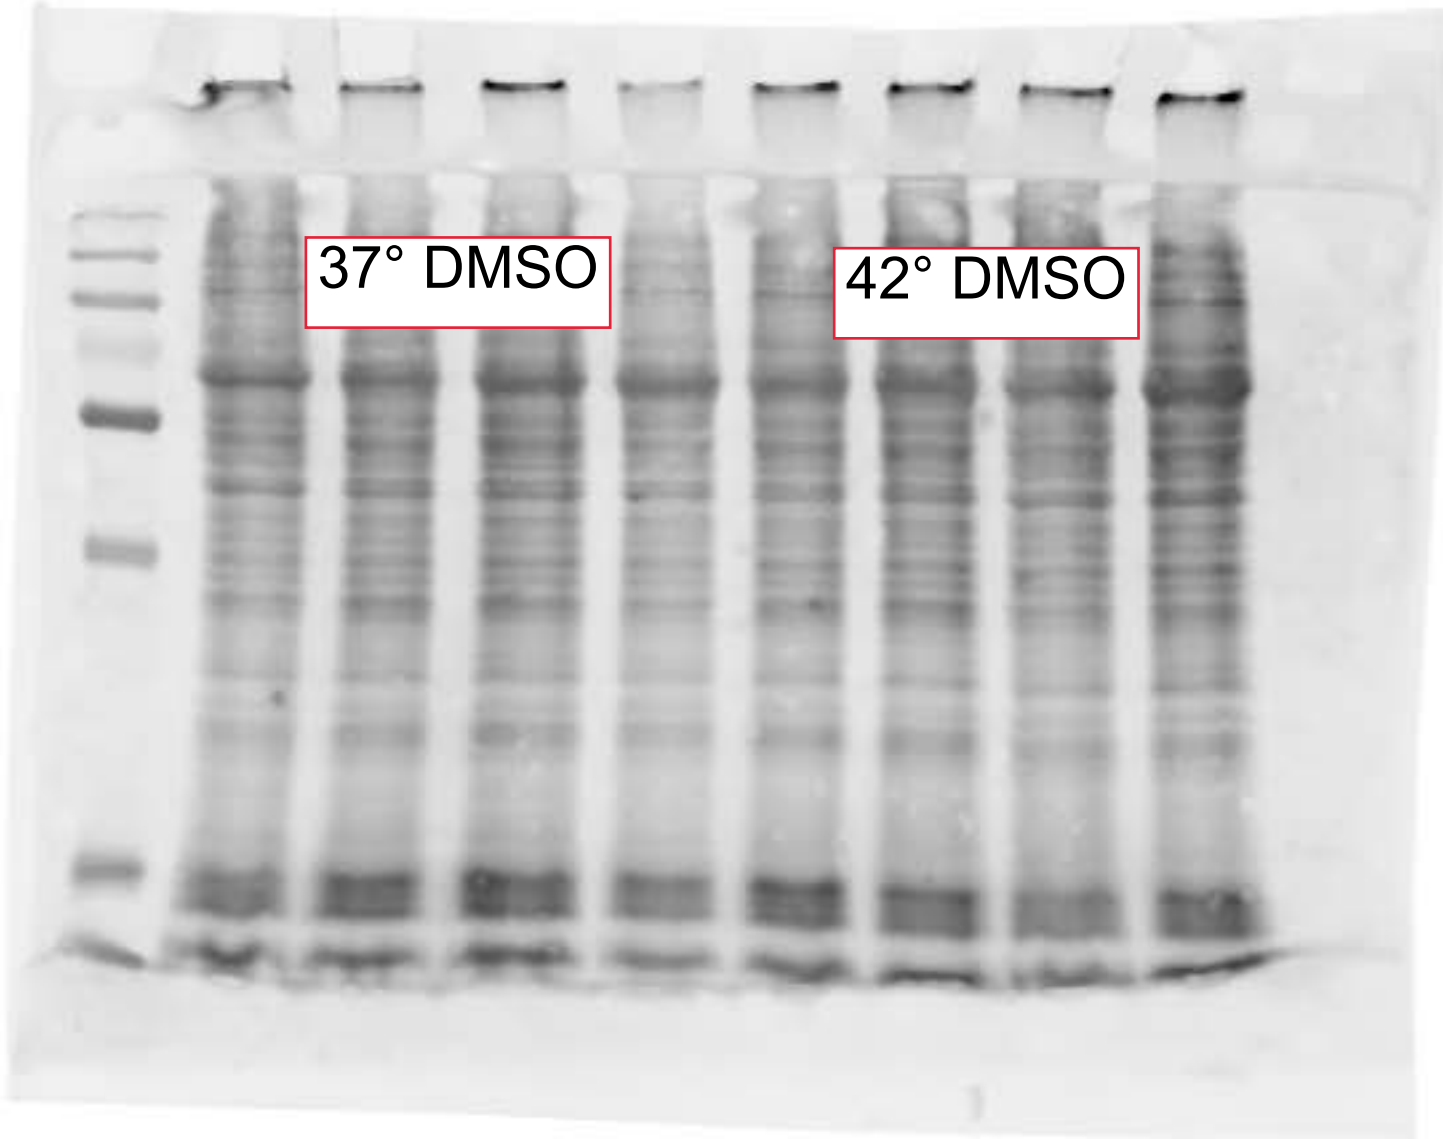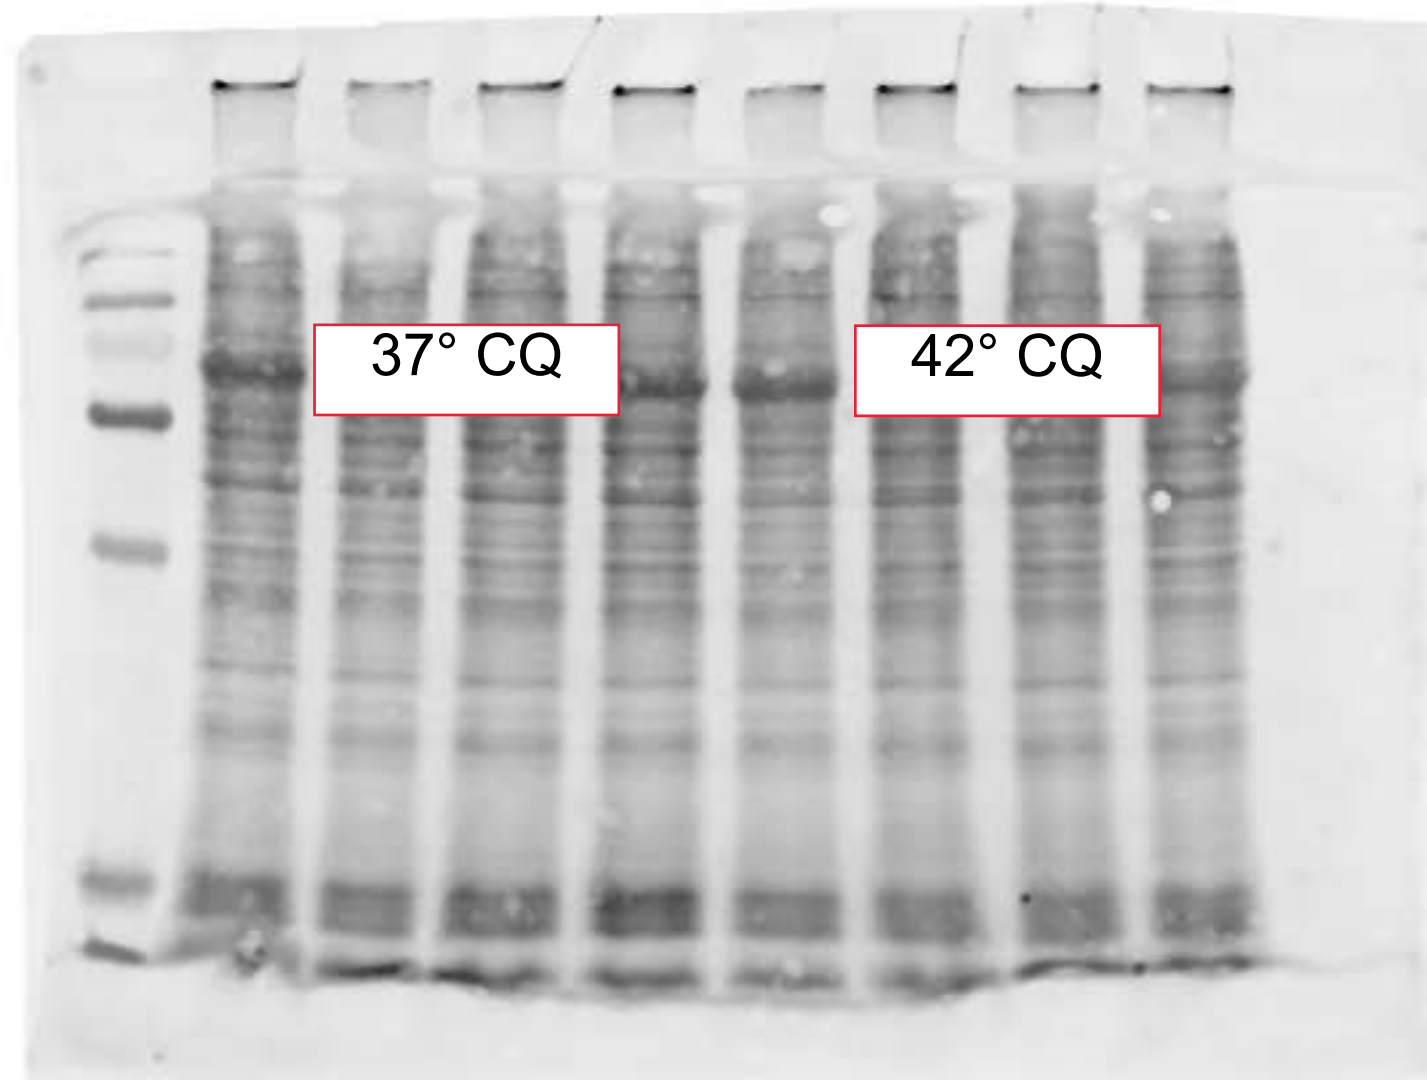

**Figure 5: anti-HA (TM-Ubc9ts)**

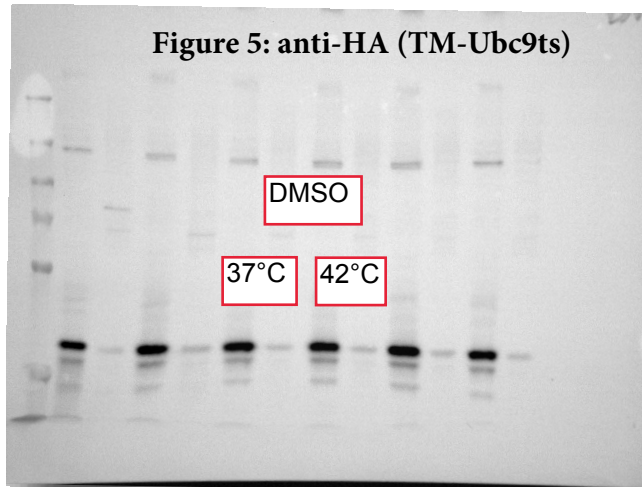

Figure 5: anti-HA (TM-Ubc9ts)

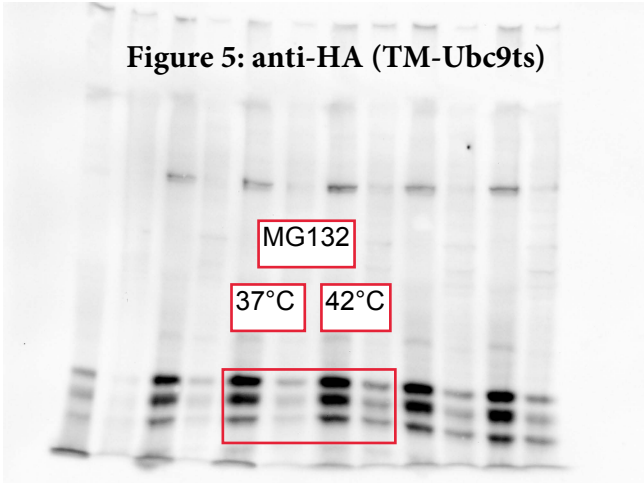

Figure 5: anti-HA (TM-Ubc9ts)

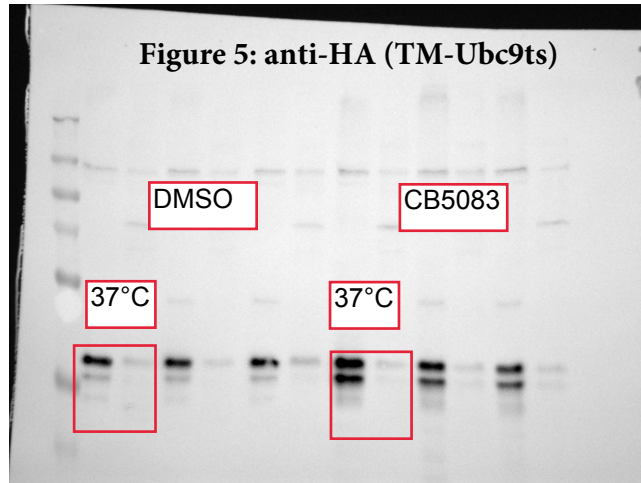



Figure 5: anti-HA (TM-Ubc9ts)

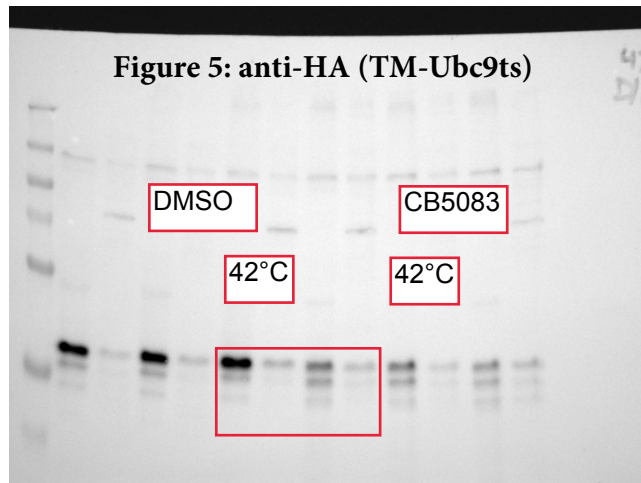

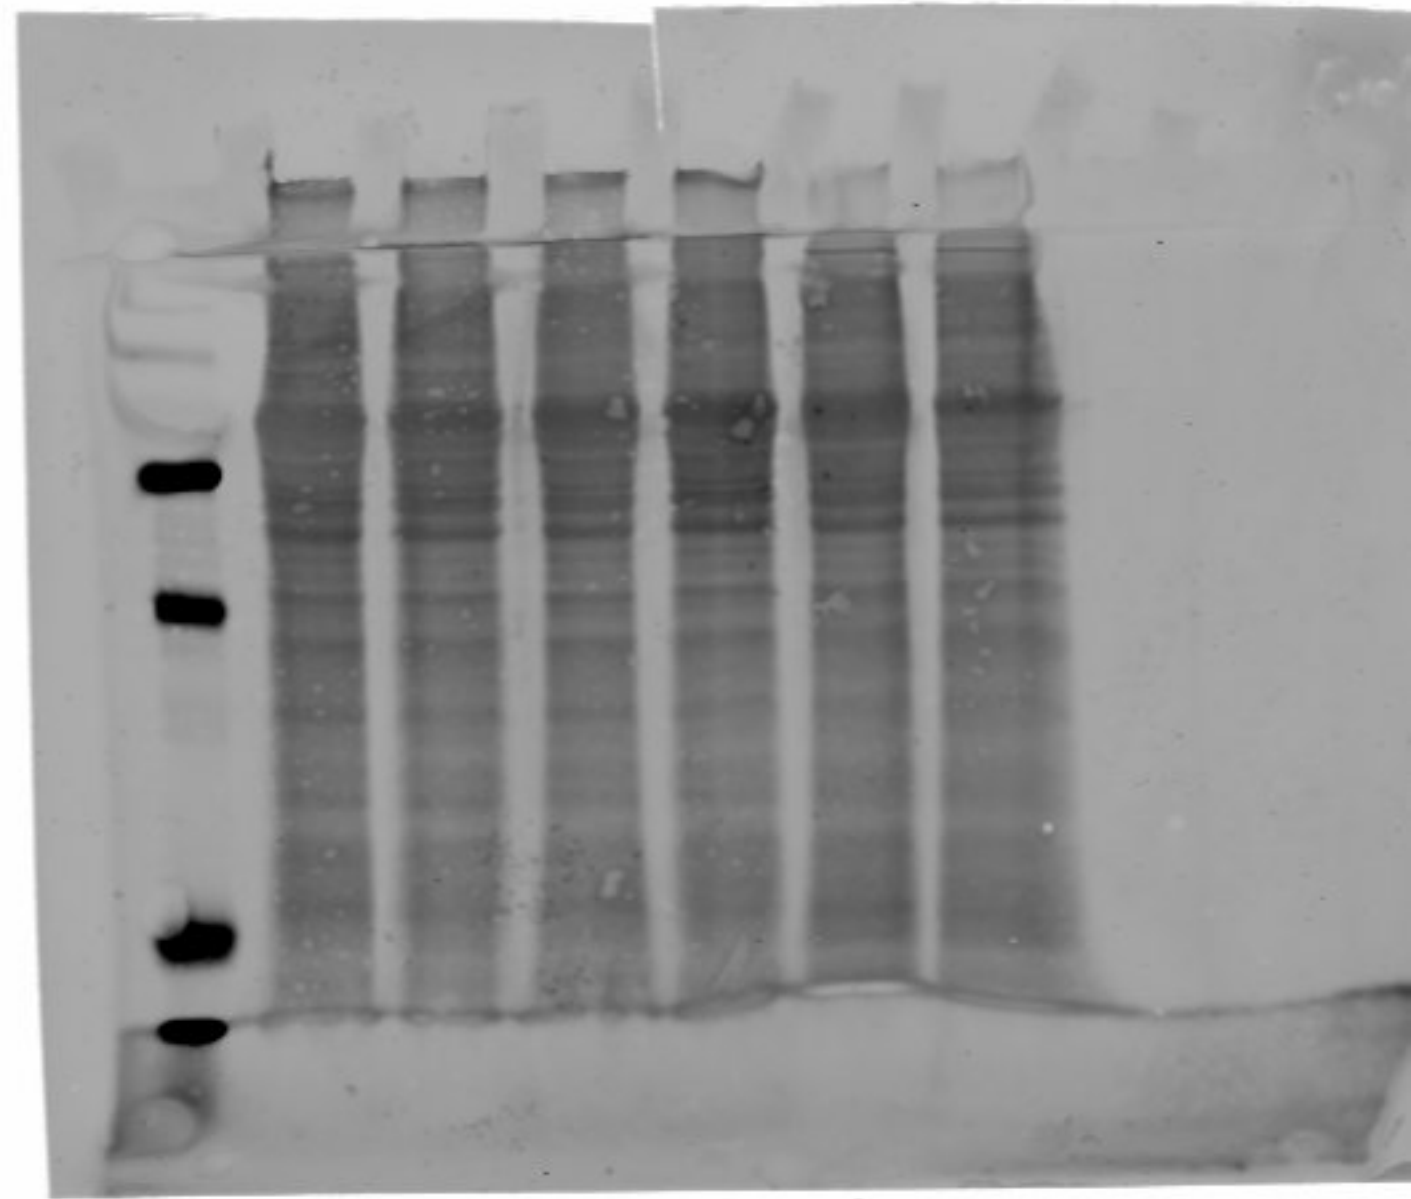

Total Protein Figure 5 A,C

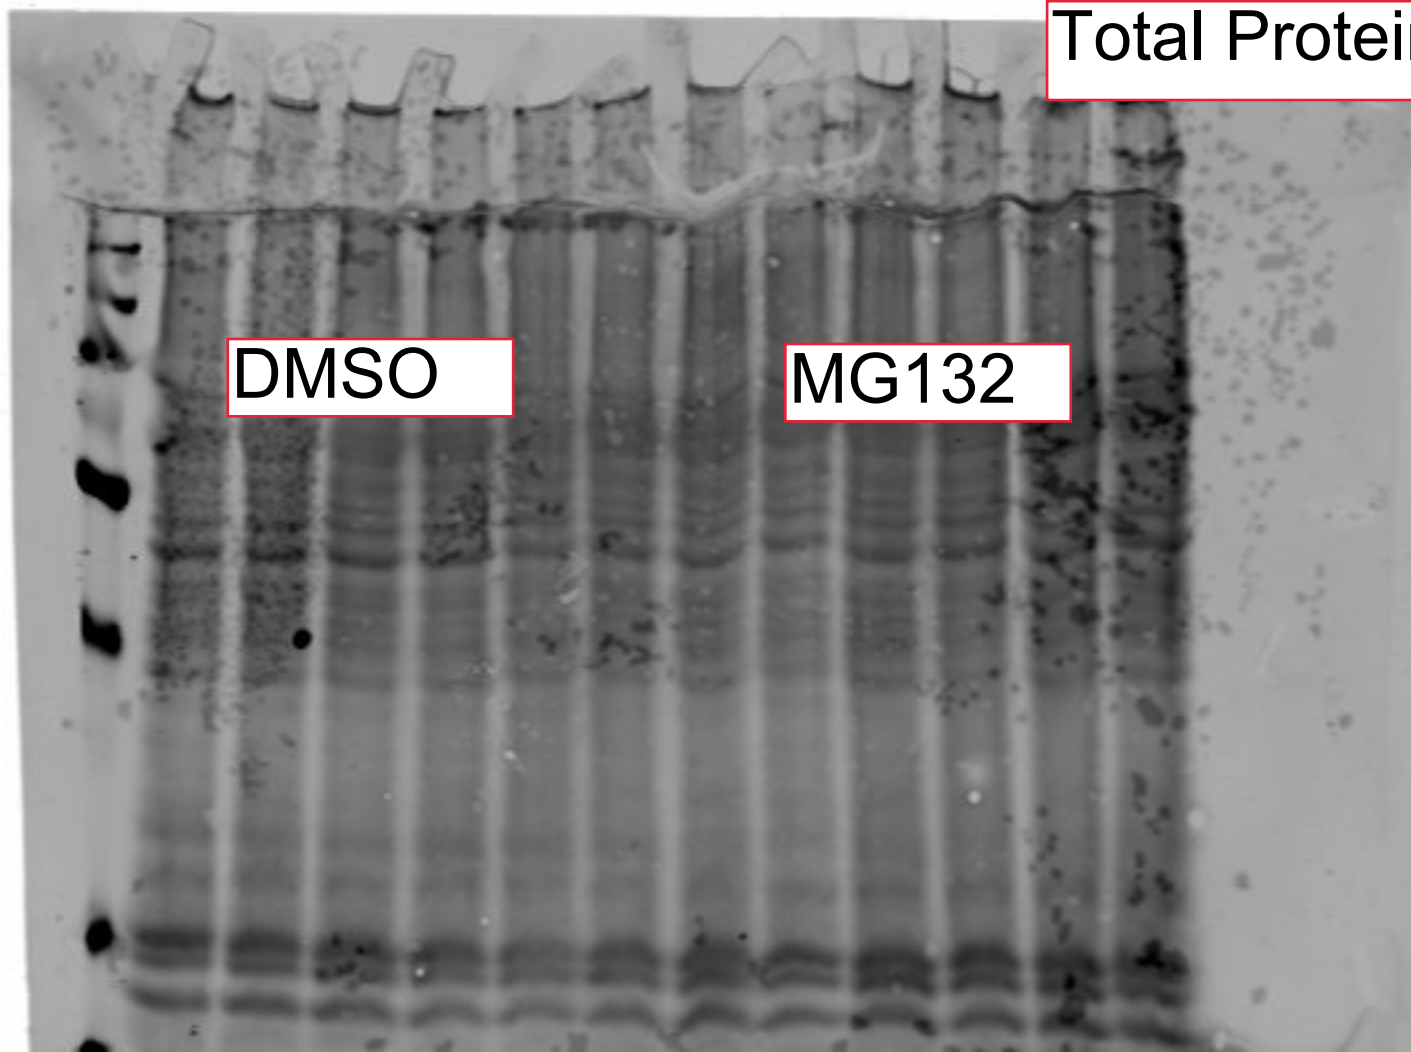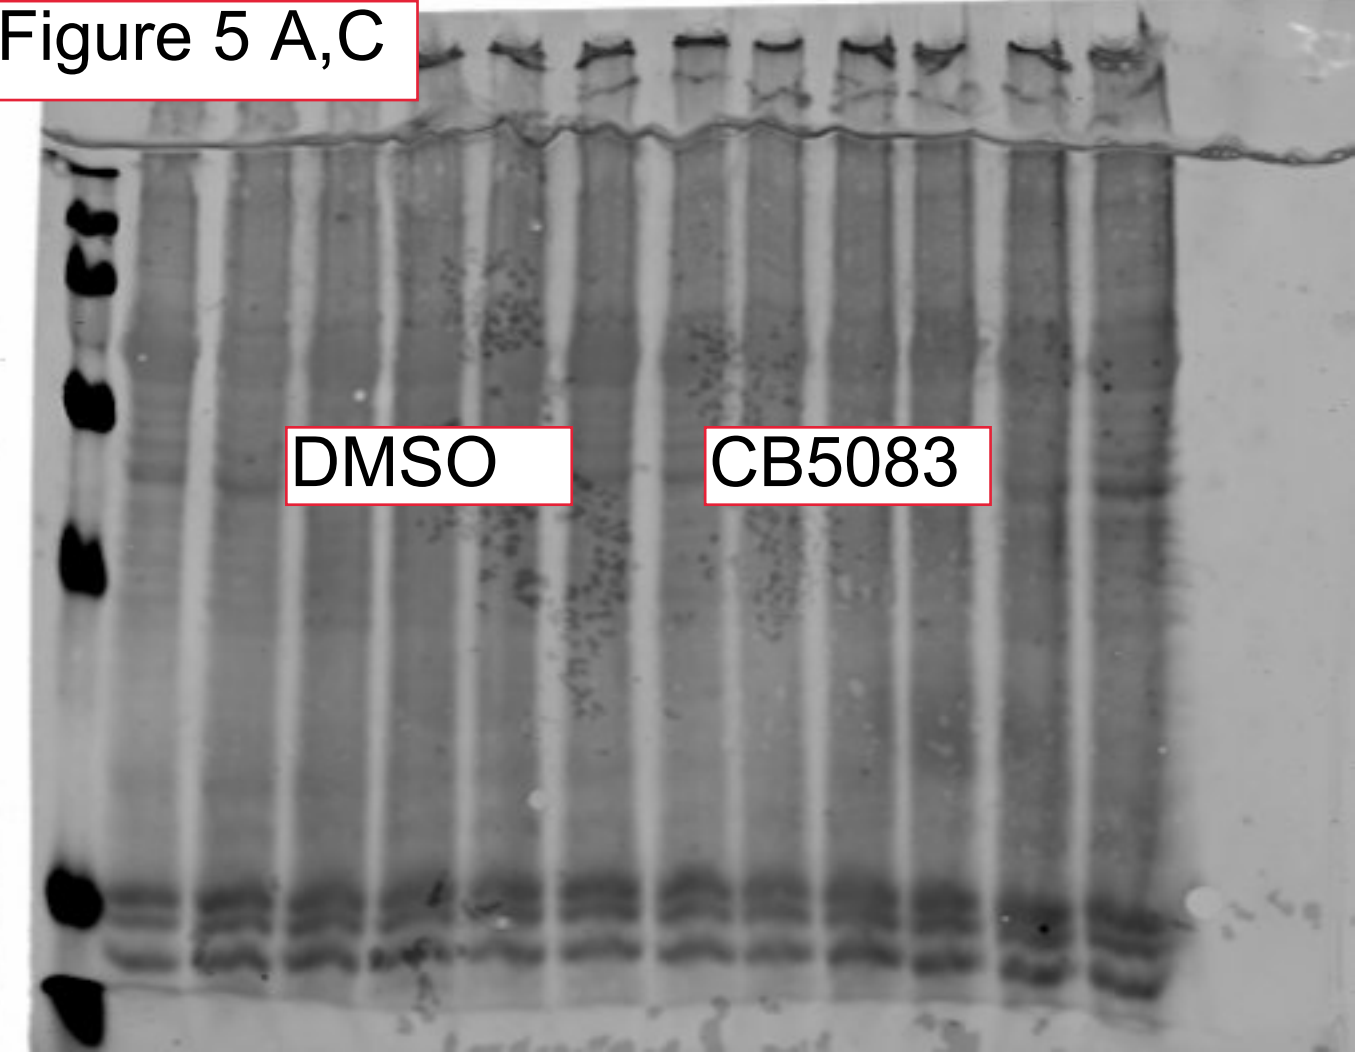

Figure 6: anti-HA (TM-Ubc9ts)

32  
CB

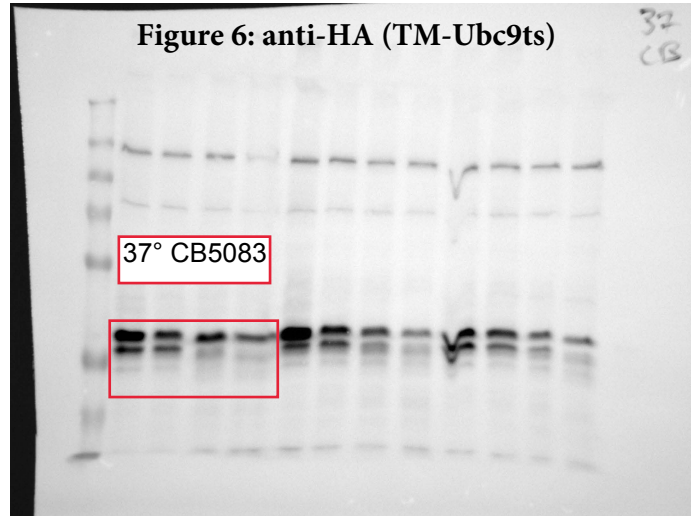

Figure 6: anti-HA (TM-Ubc9ts)

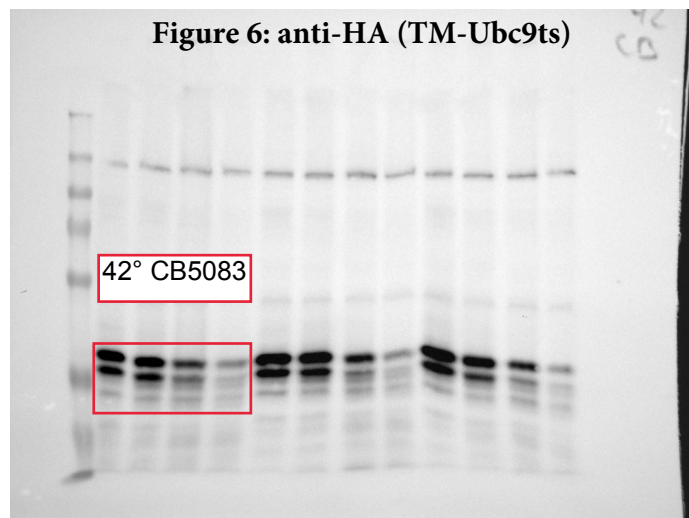

Figure 6: anti-HA (TM-Ubc9ts)

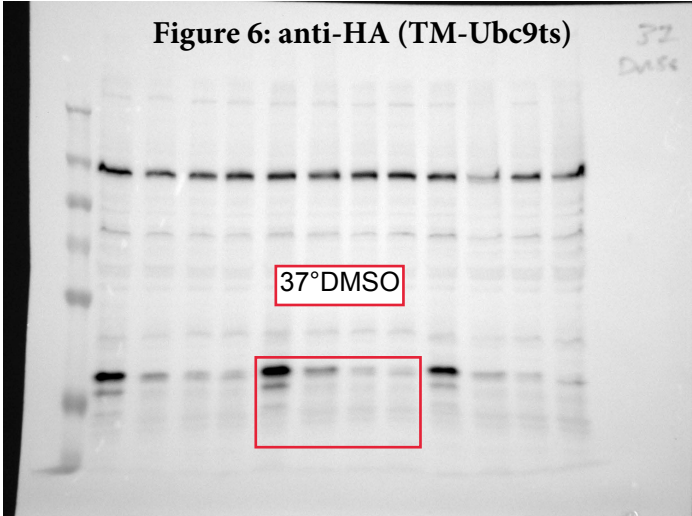

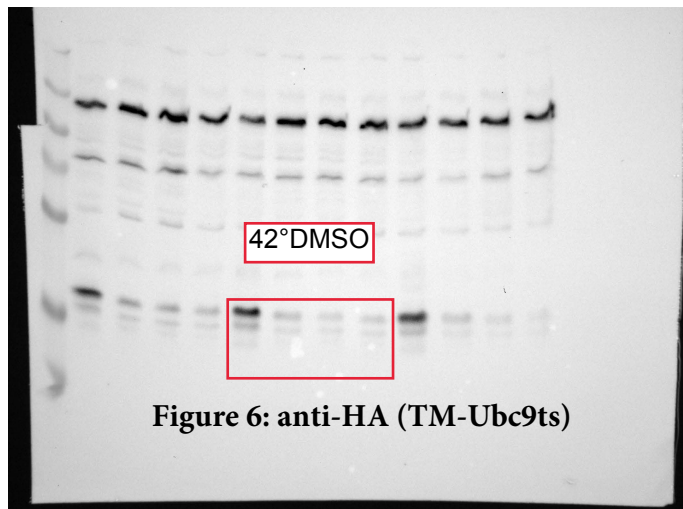

Figure 6: anti-HA (TM-Ubc9ts)

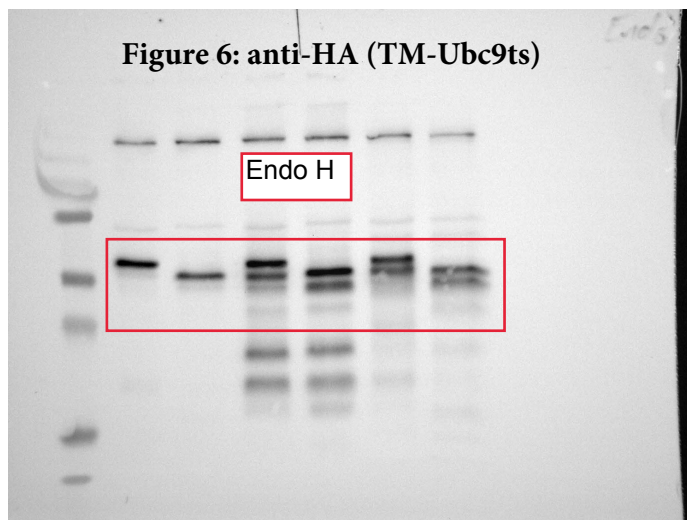

**Figure 6: anti-HA (TM-Ubc9ts)**

Carbonate Extraction

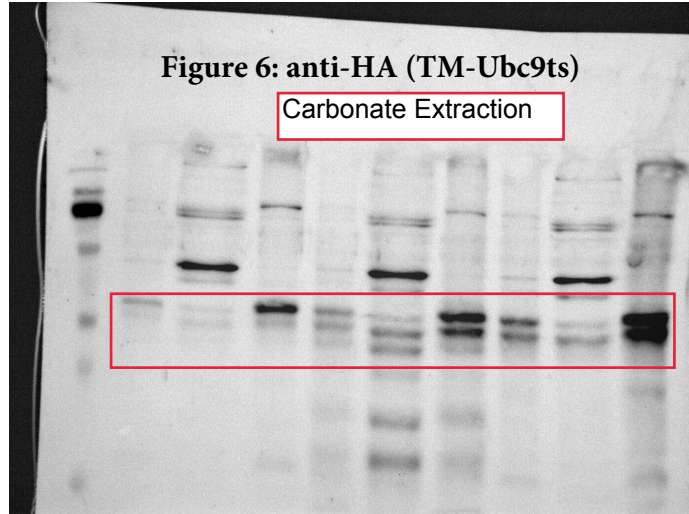



Figure 6D: anti-Hsp70

Carbonate Extraction

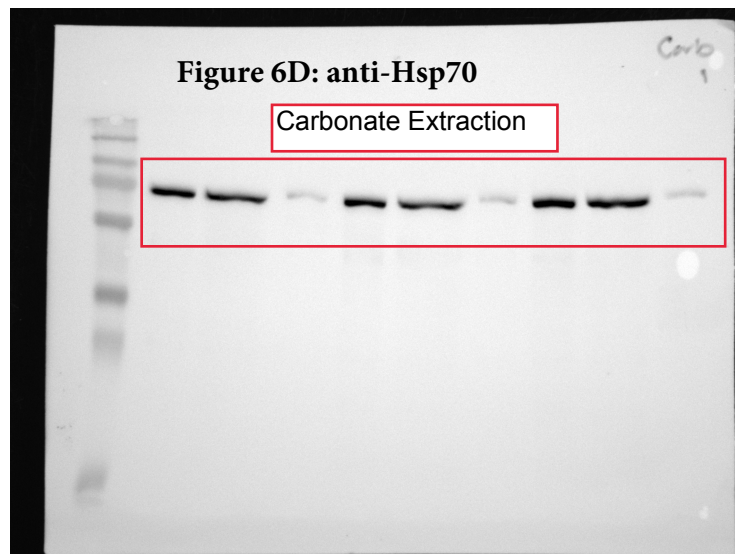

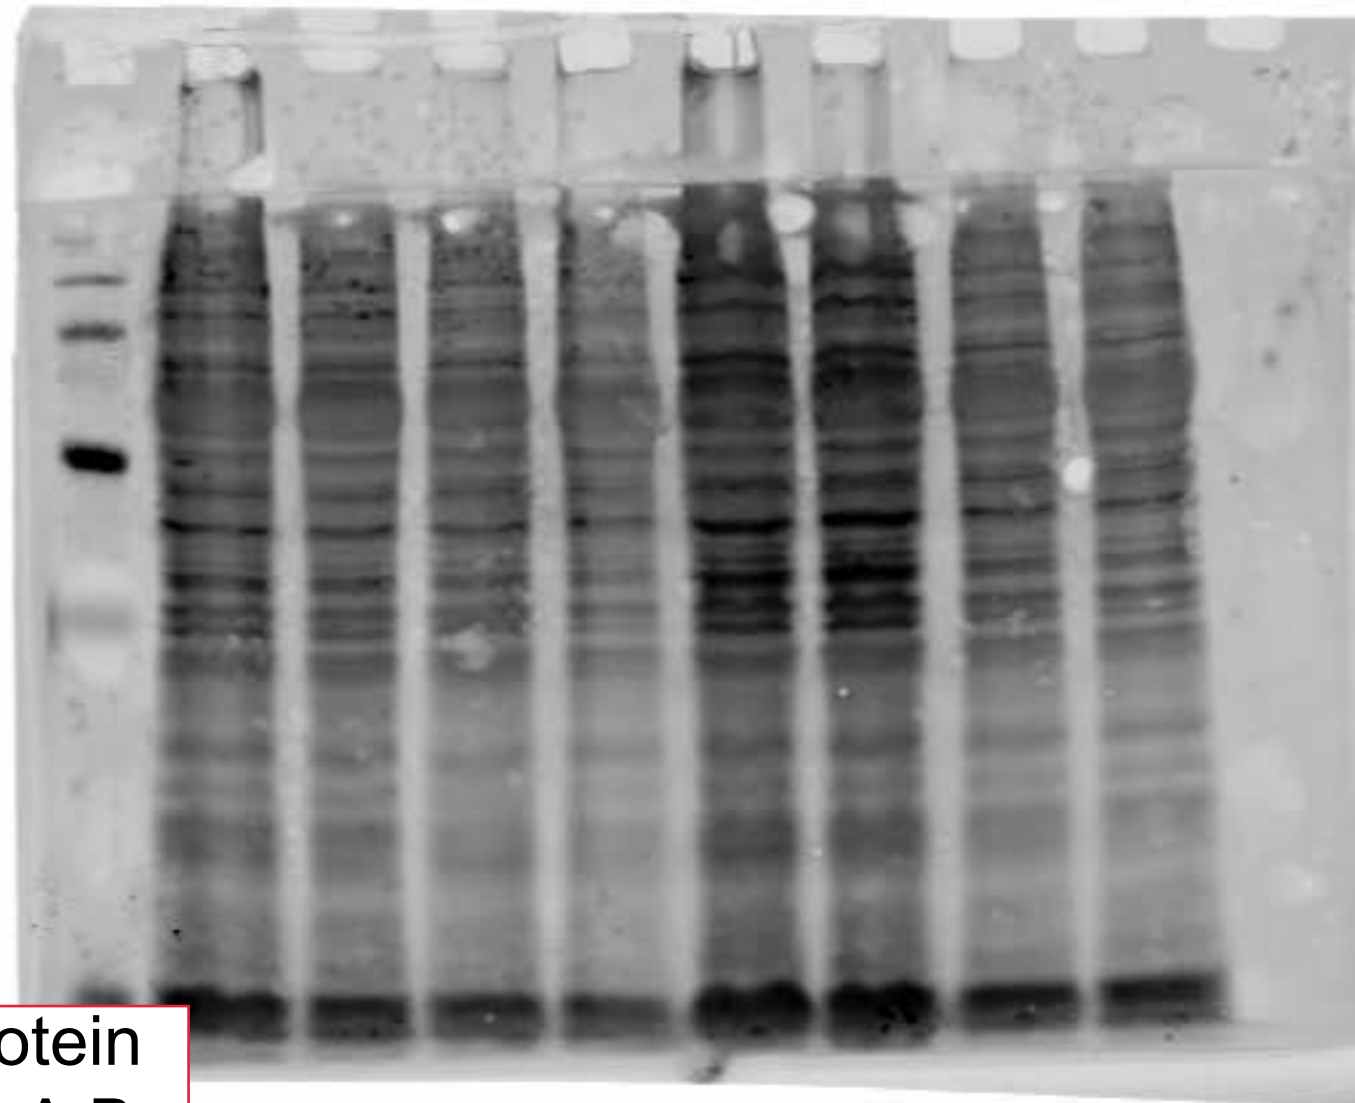

Total Protein  
Figure 6 A,B

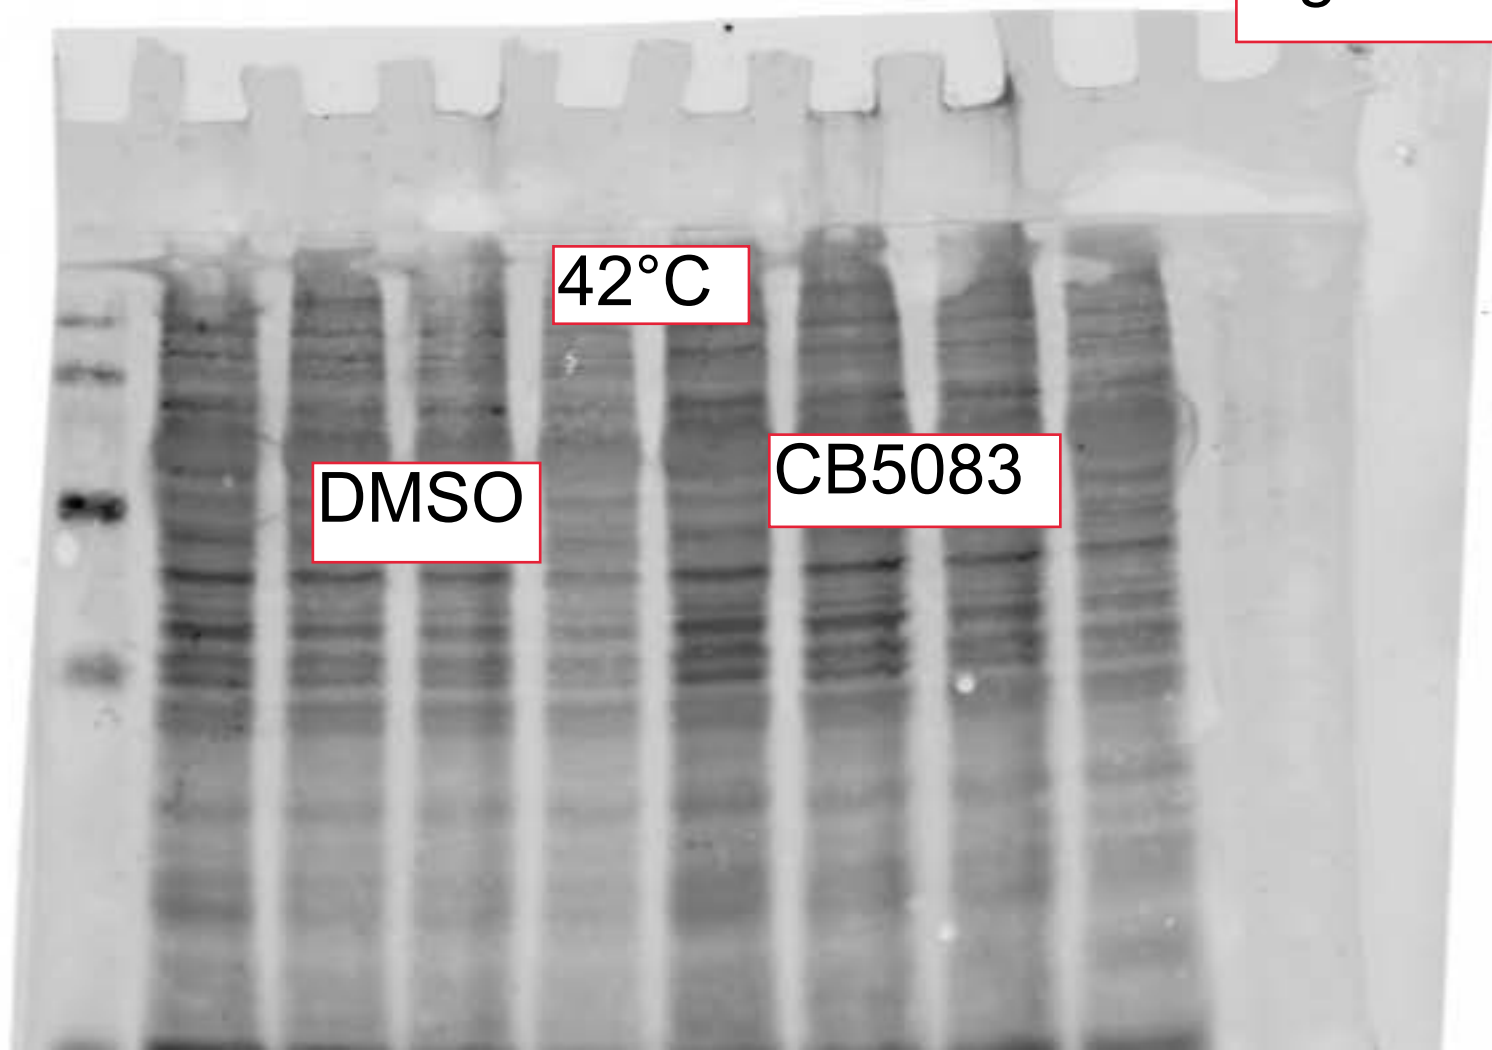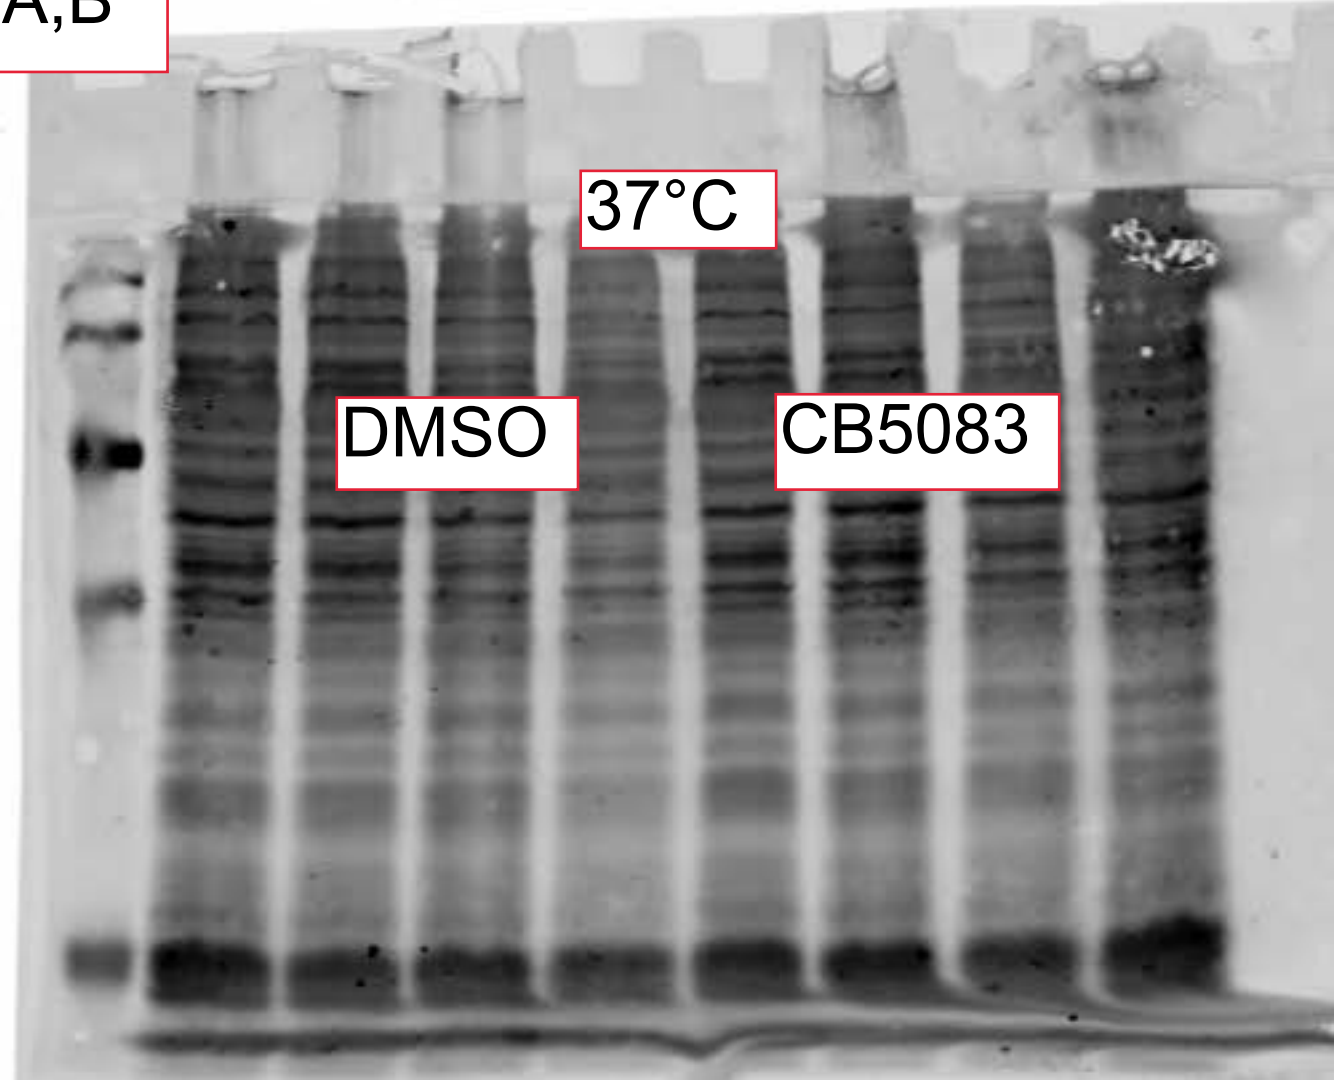

Total Protein  
Endo H

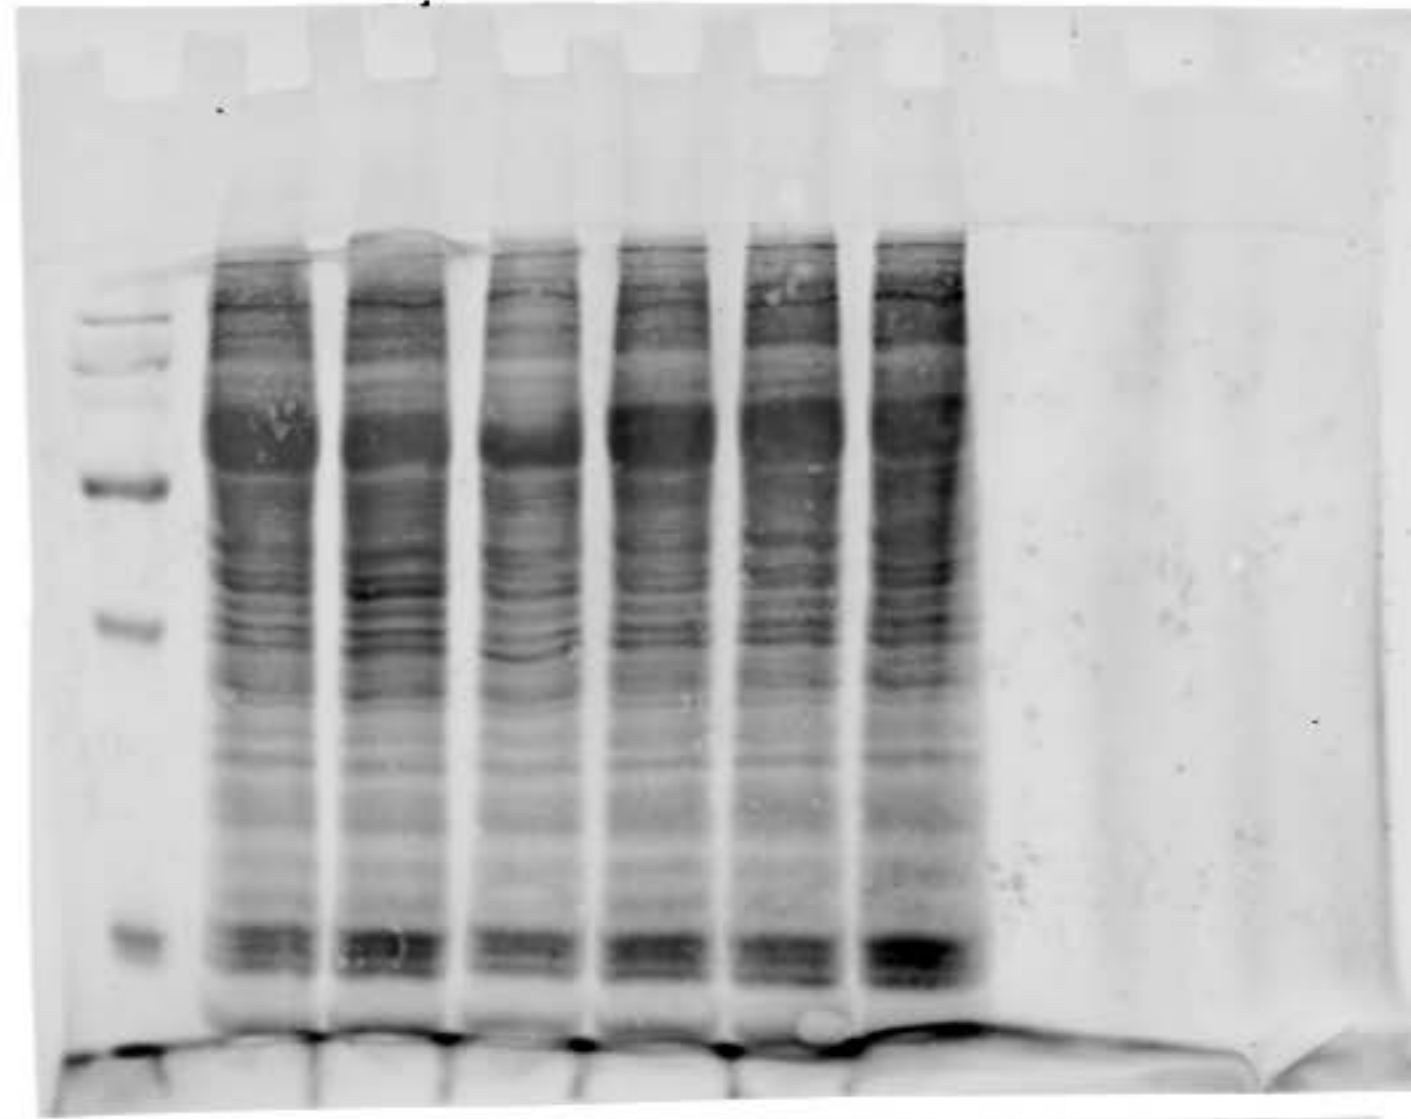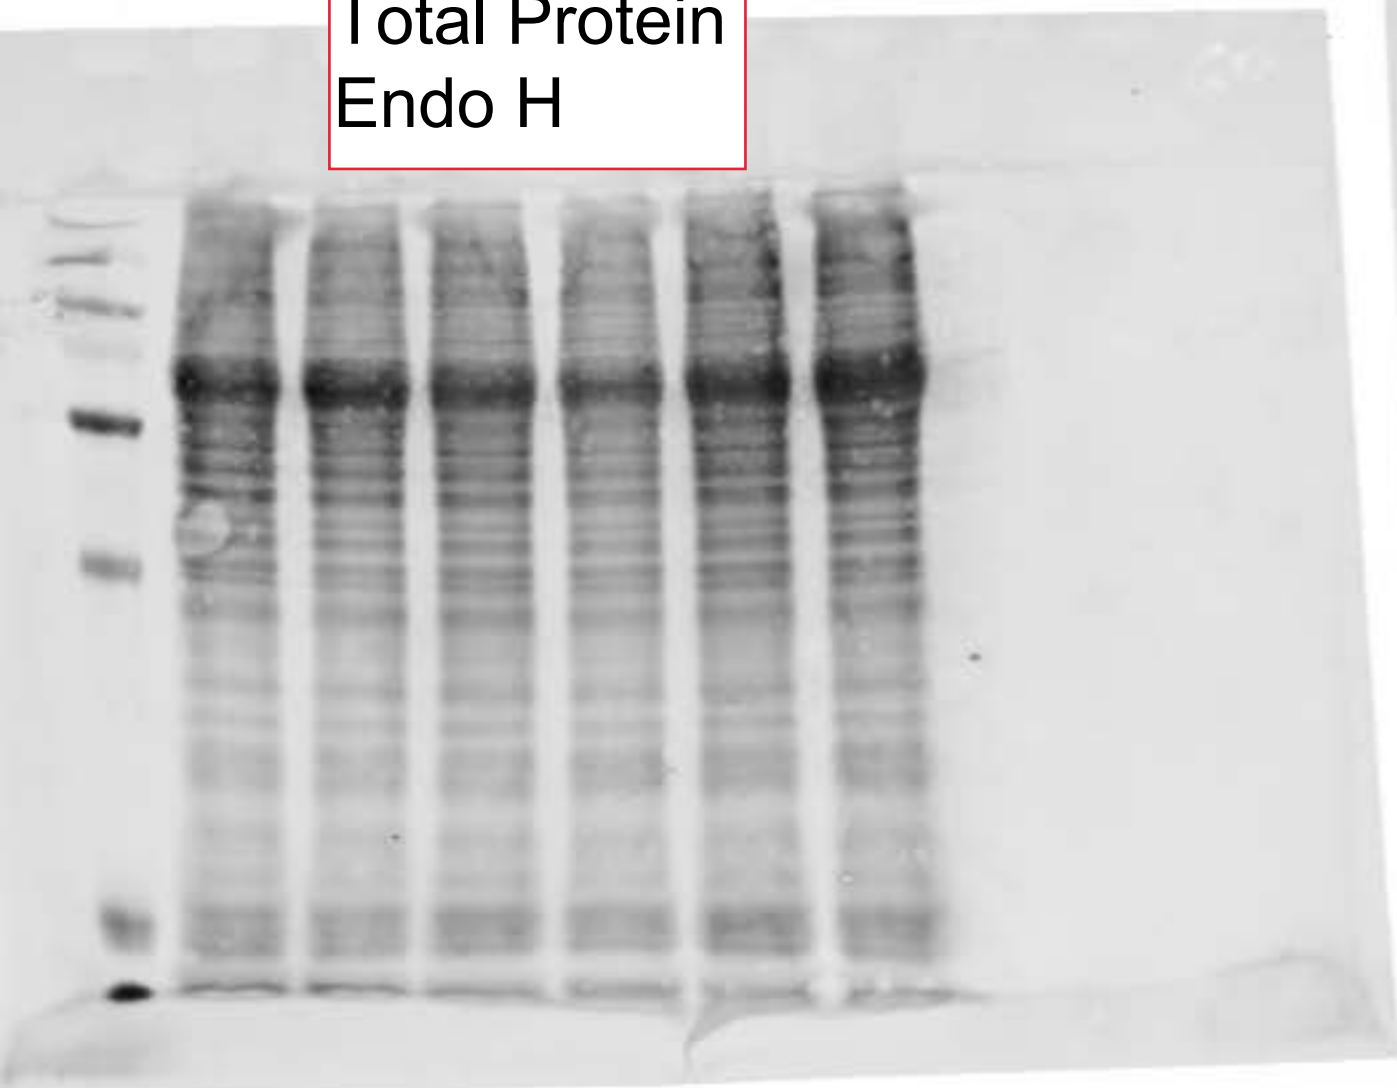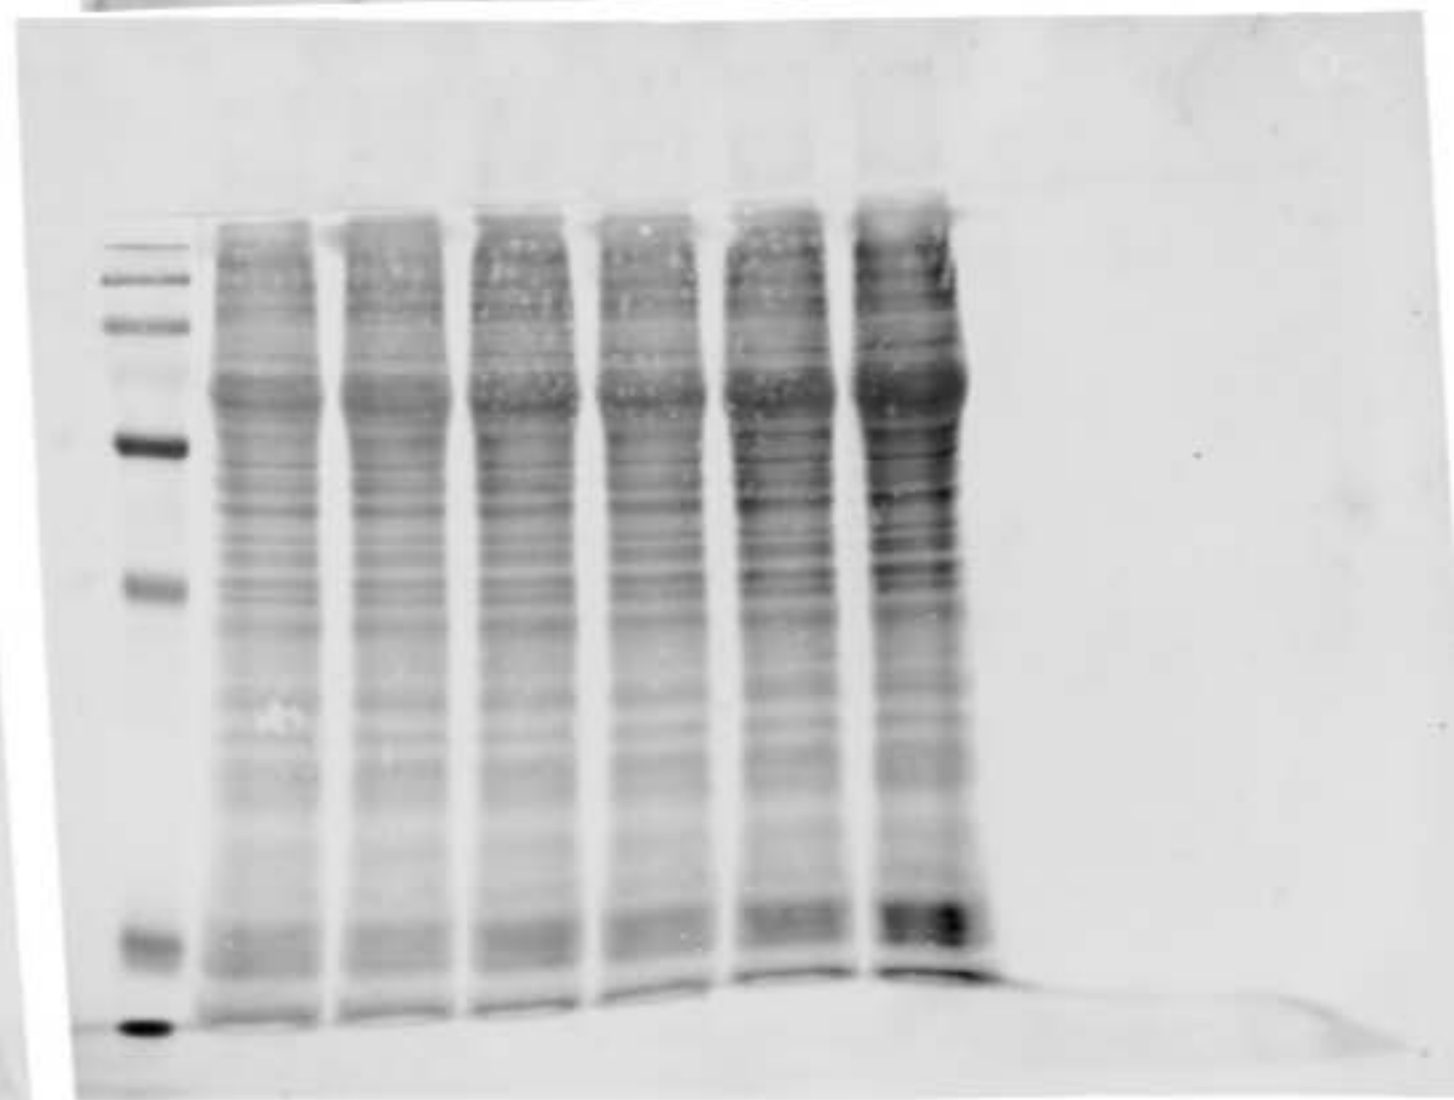

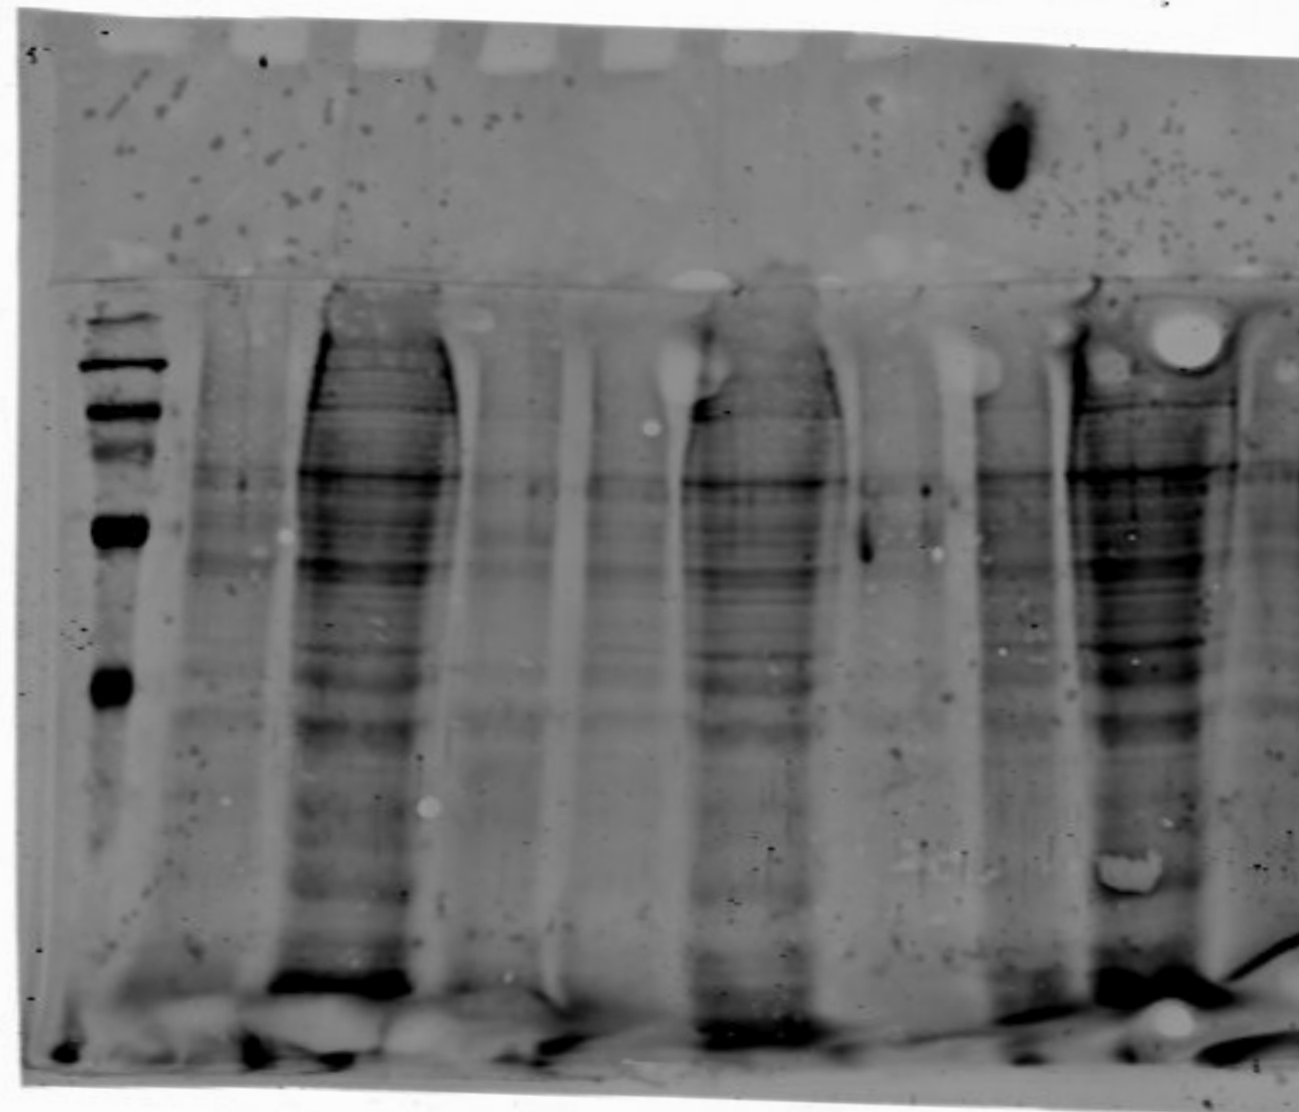

Total Protein  
Carbonate Extraction: HA

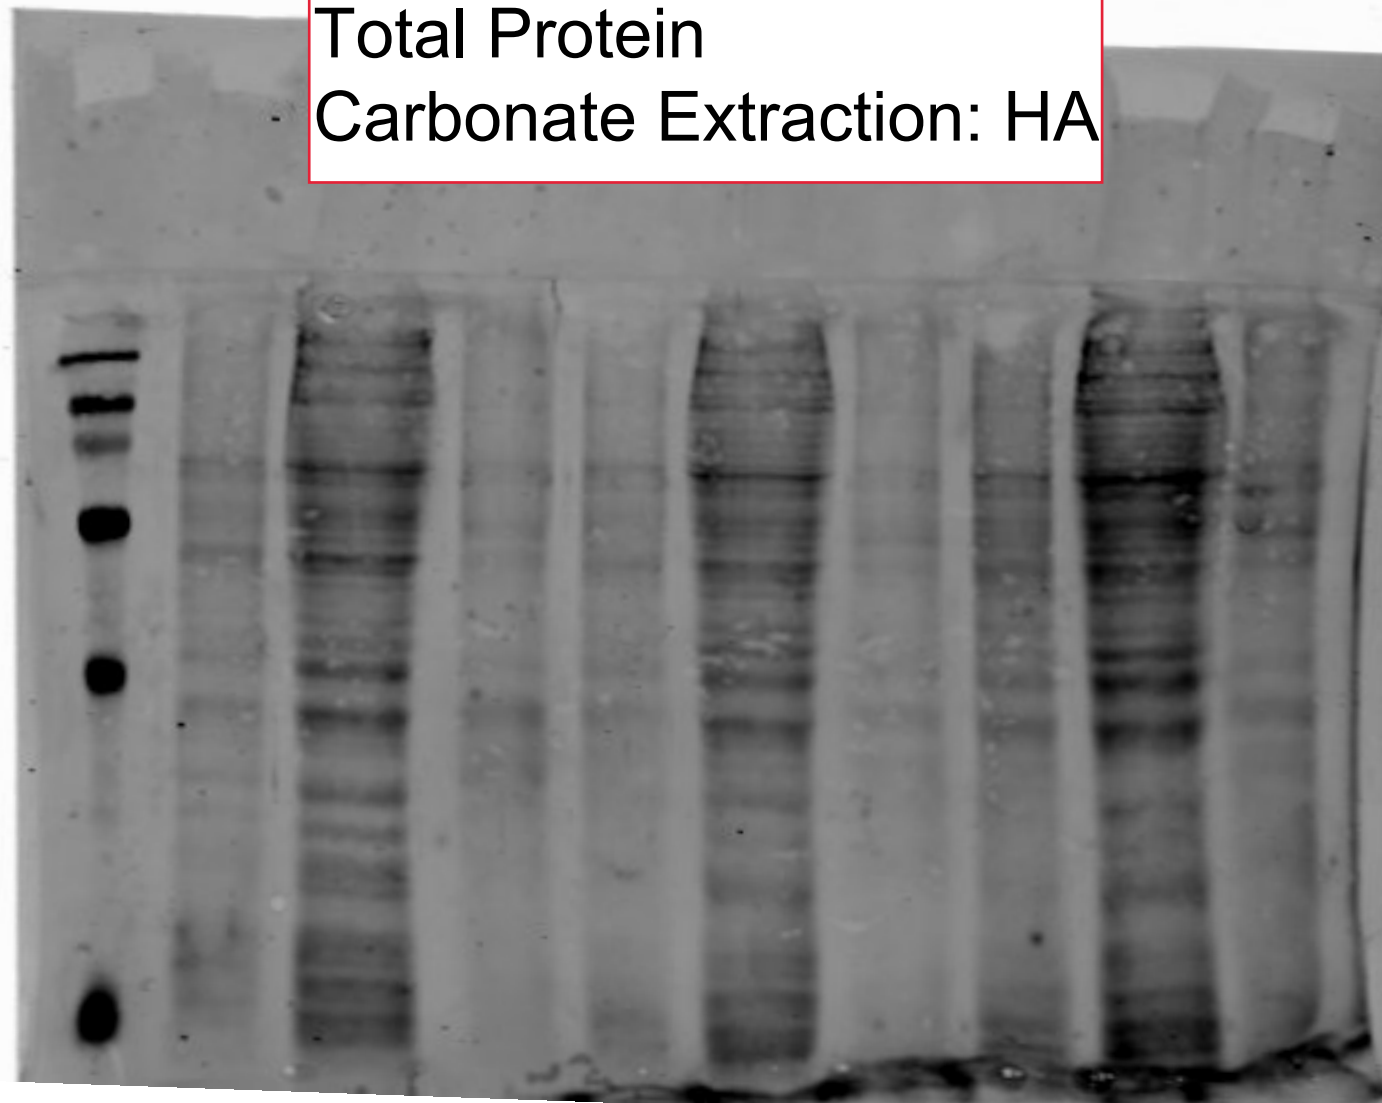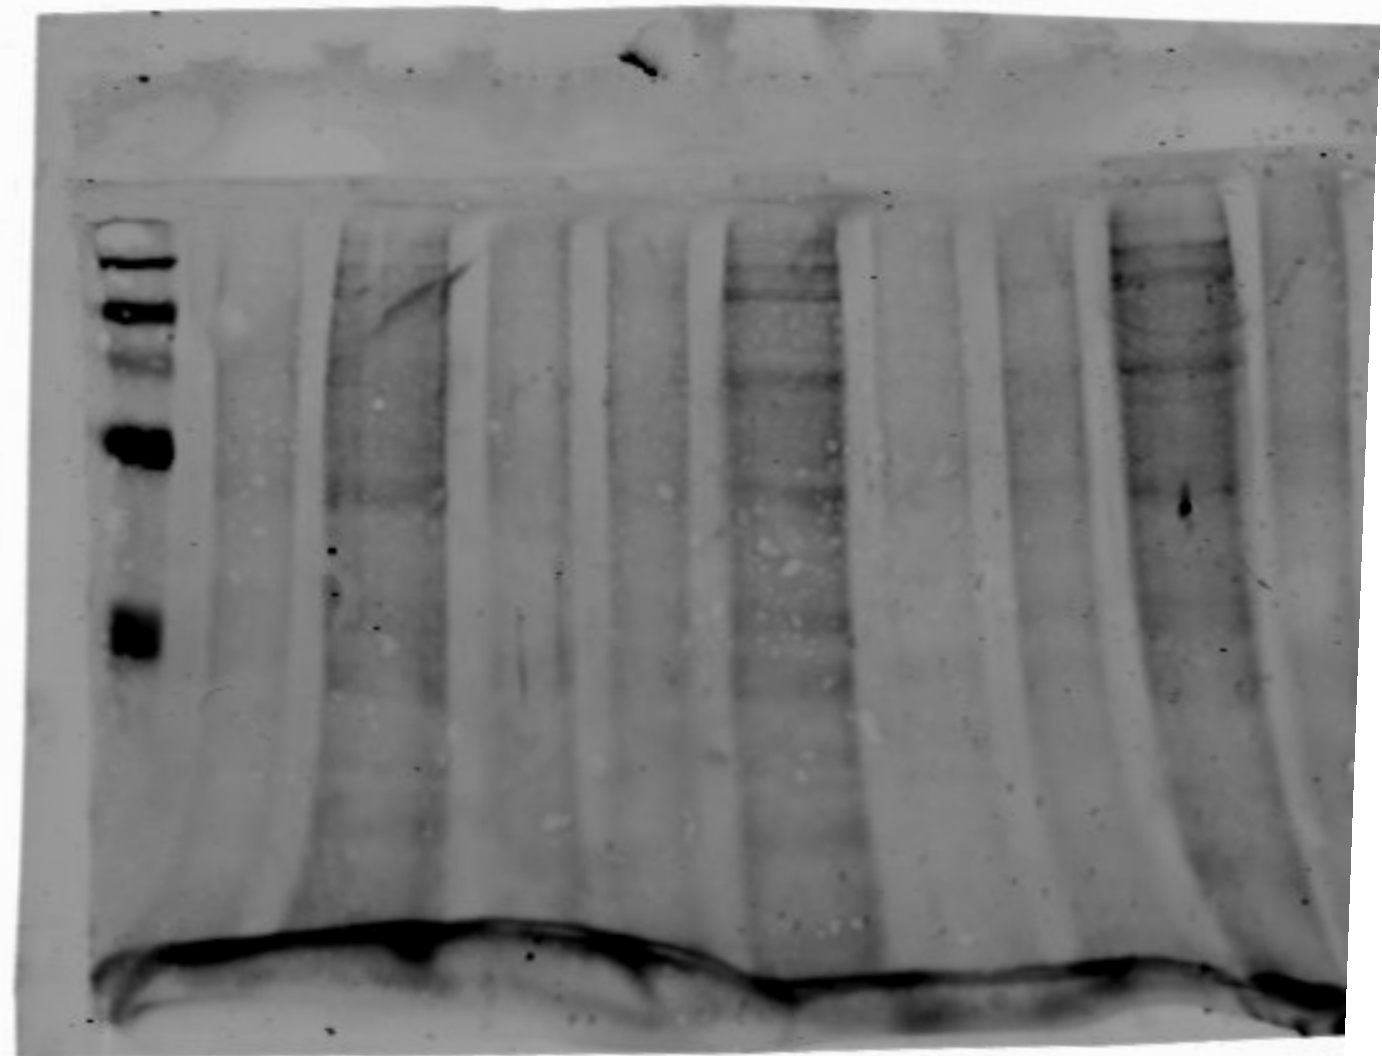

Total Protein: Figure 6D  
Carbonate Extraction: Hsp70

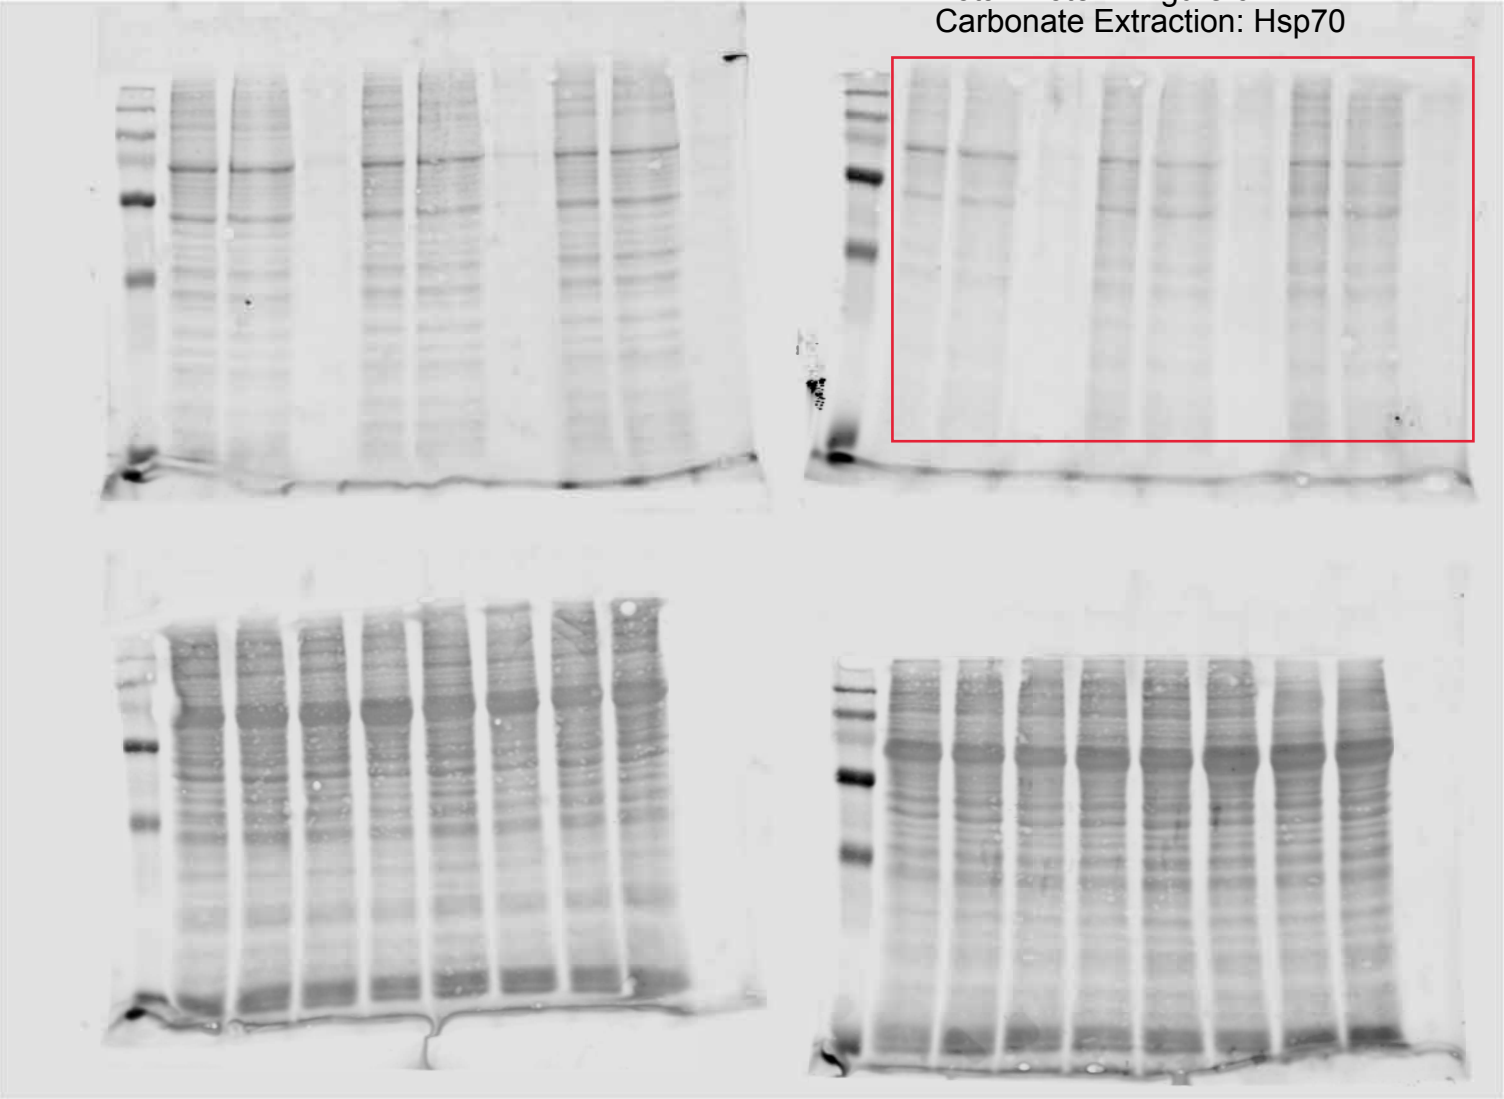

Figure 7: anti-HA (TM-Ubc9ts)

51  
3/12

Figure 7A

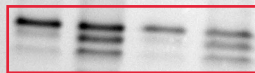

Figure 7: anti-RHBDL4

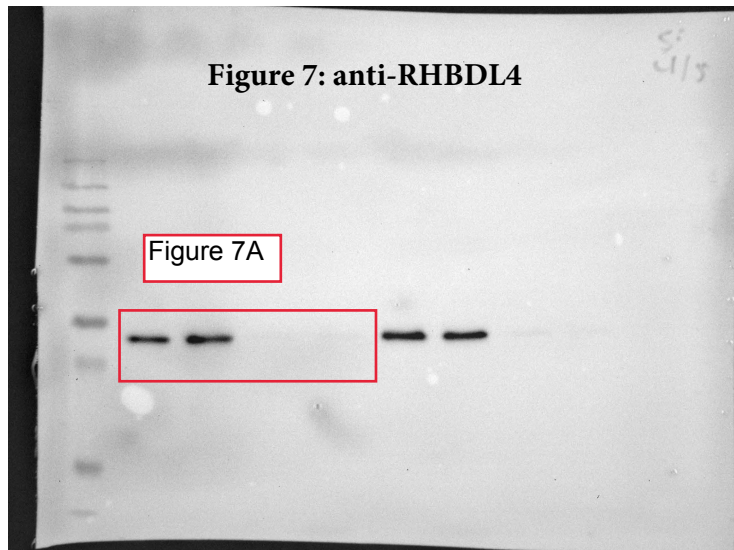

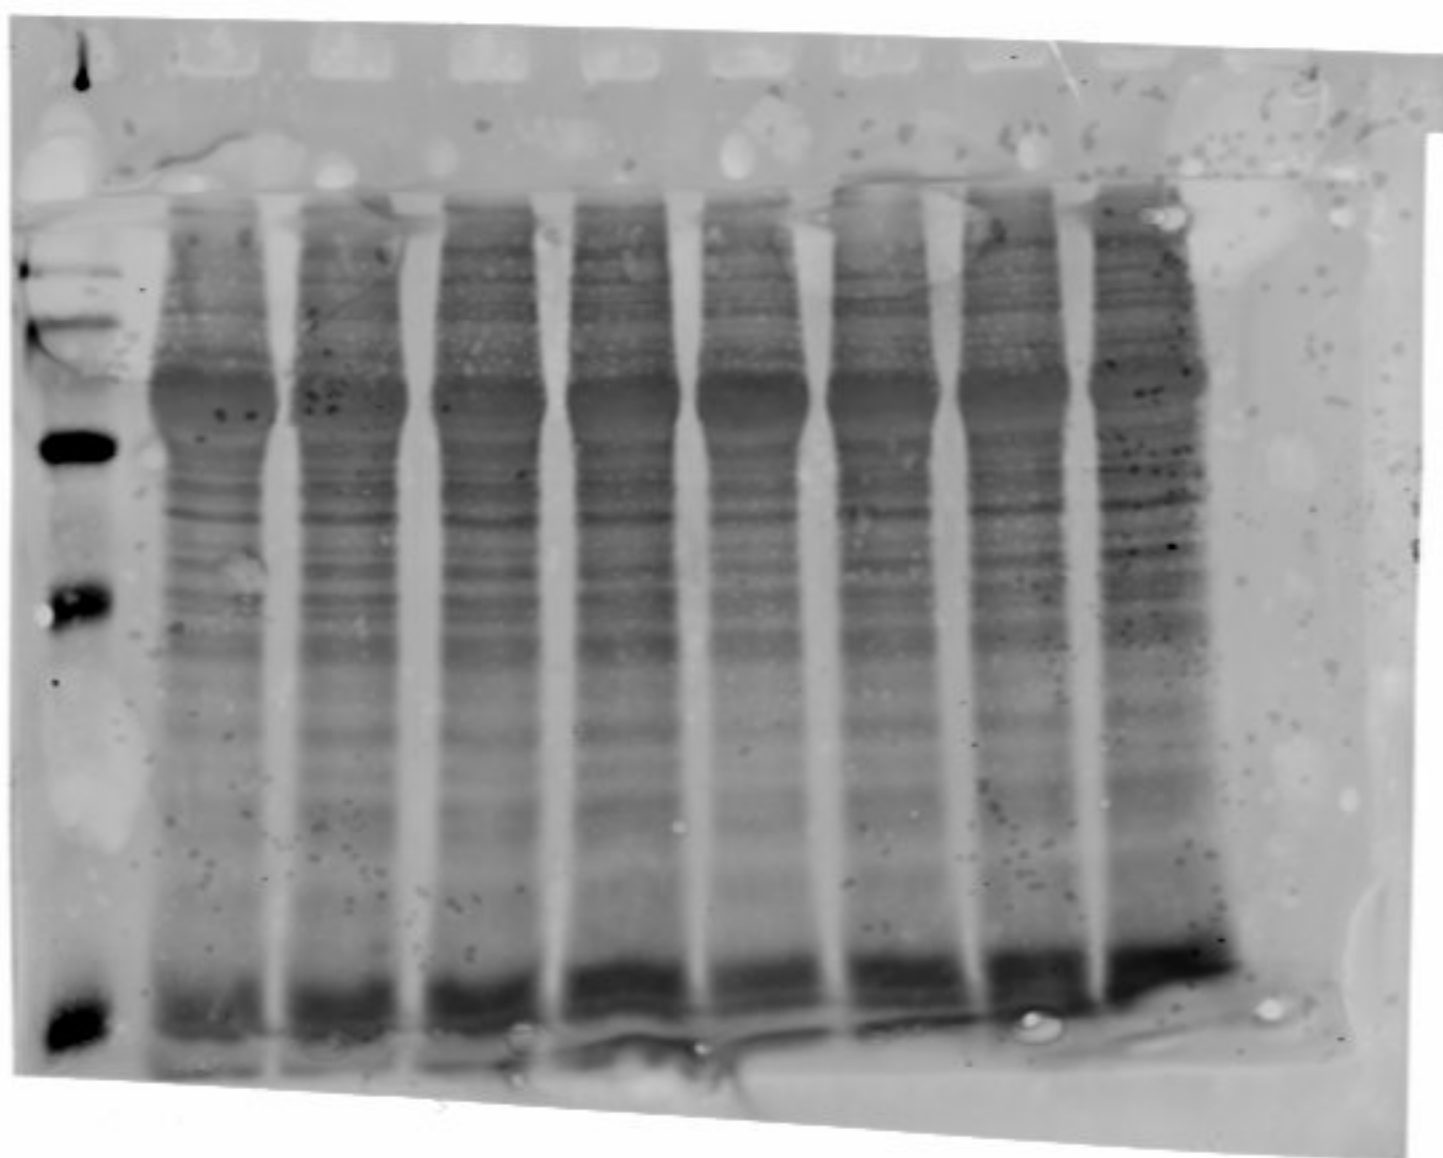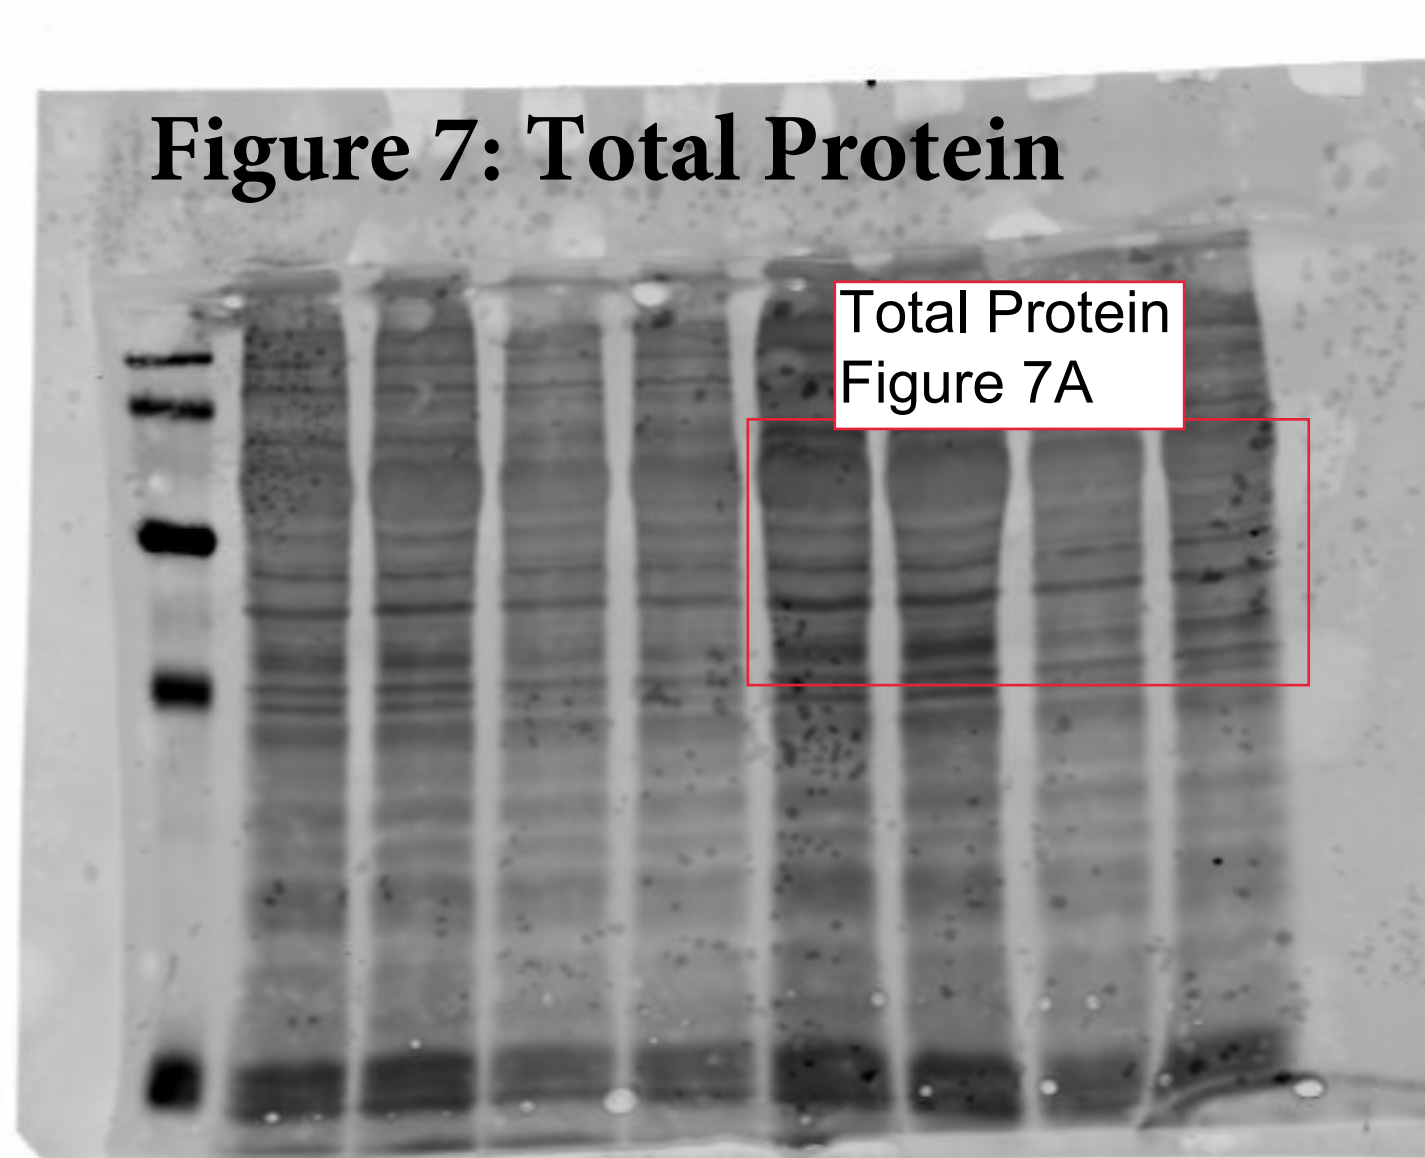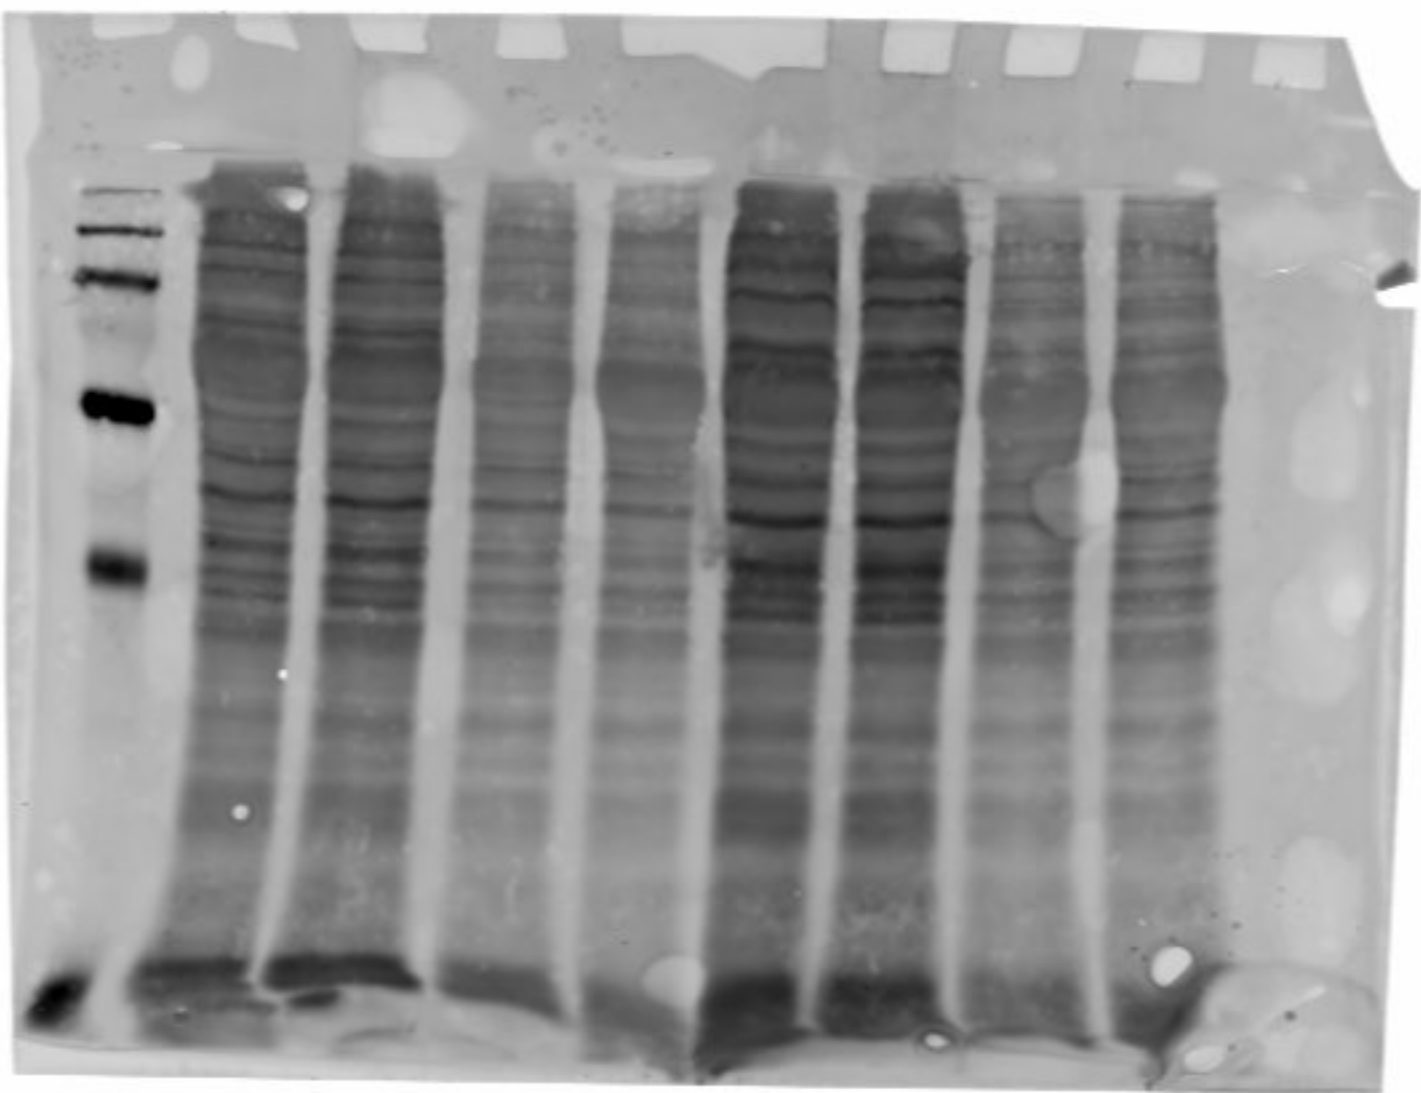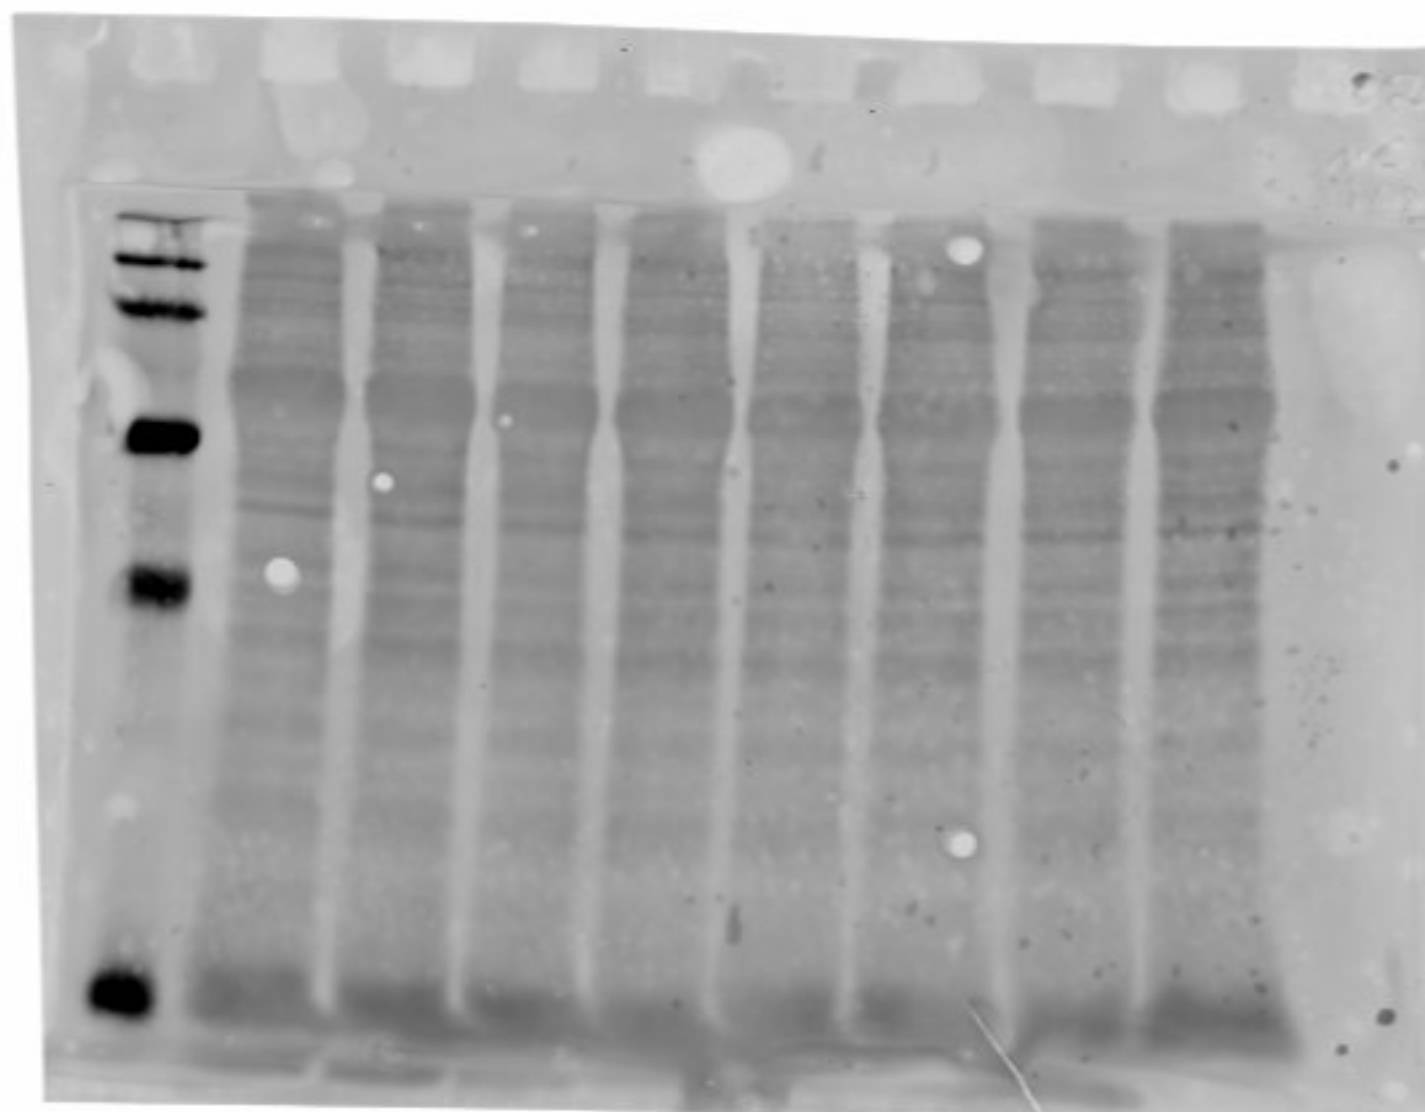



Figure 7: anti-FLAG (MHC202)

Figure 7B

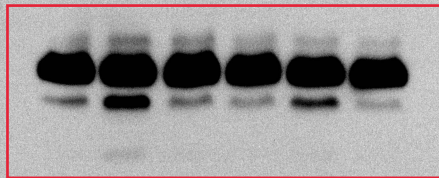

**Figure 7: anti-RHBDL4**

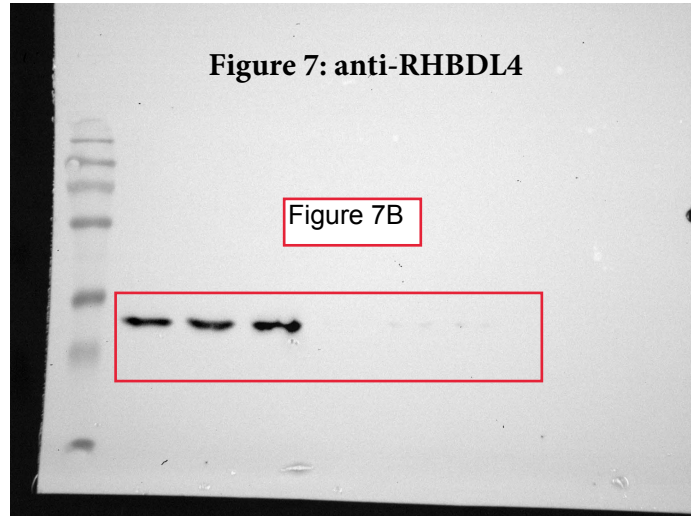

**Figure 7: anti-GFP (Ubc9ts-GFP)**

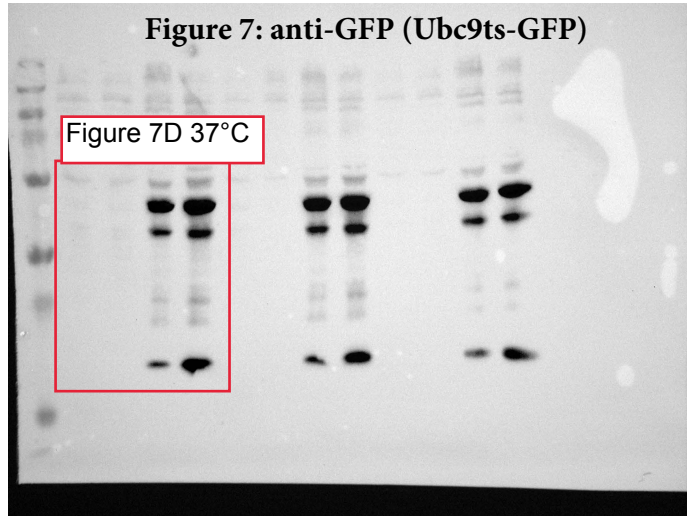

**Figure 7: anti-GFP (Ubc9ts-GFP)**

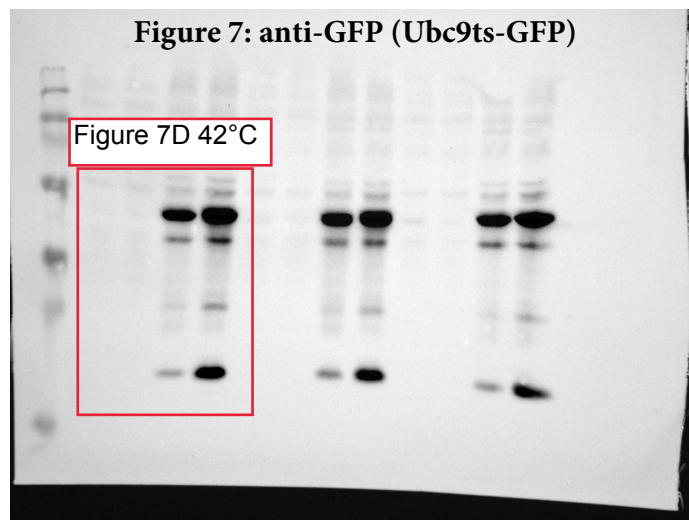

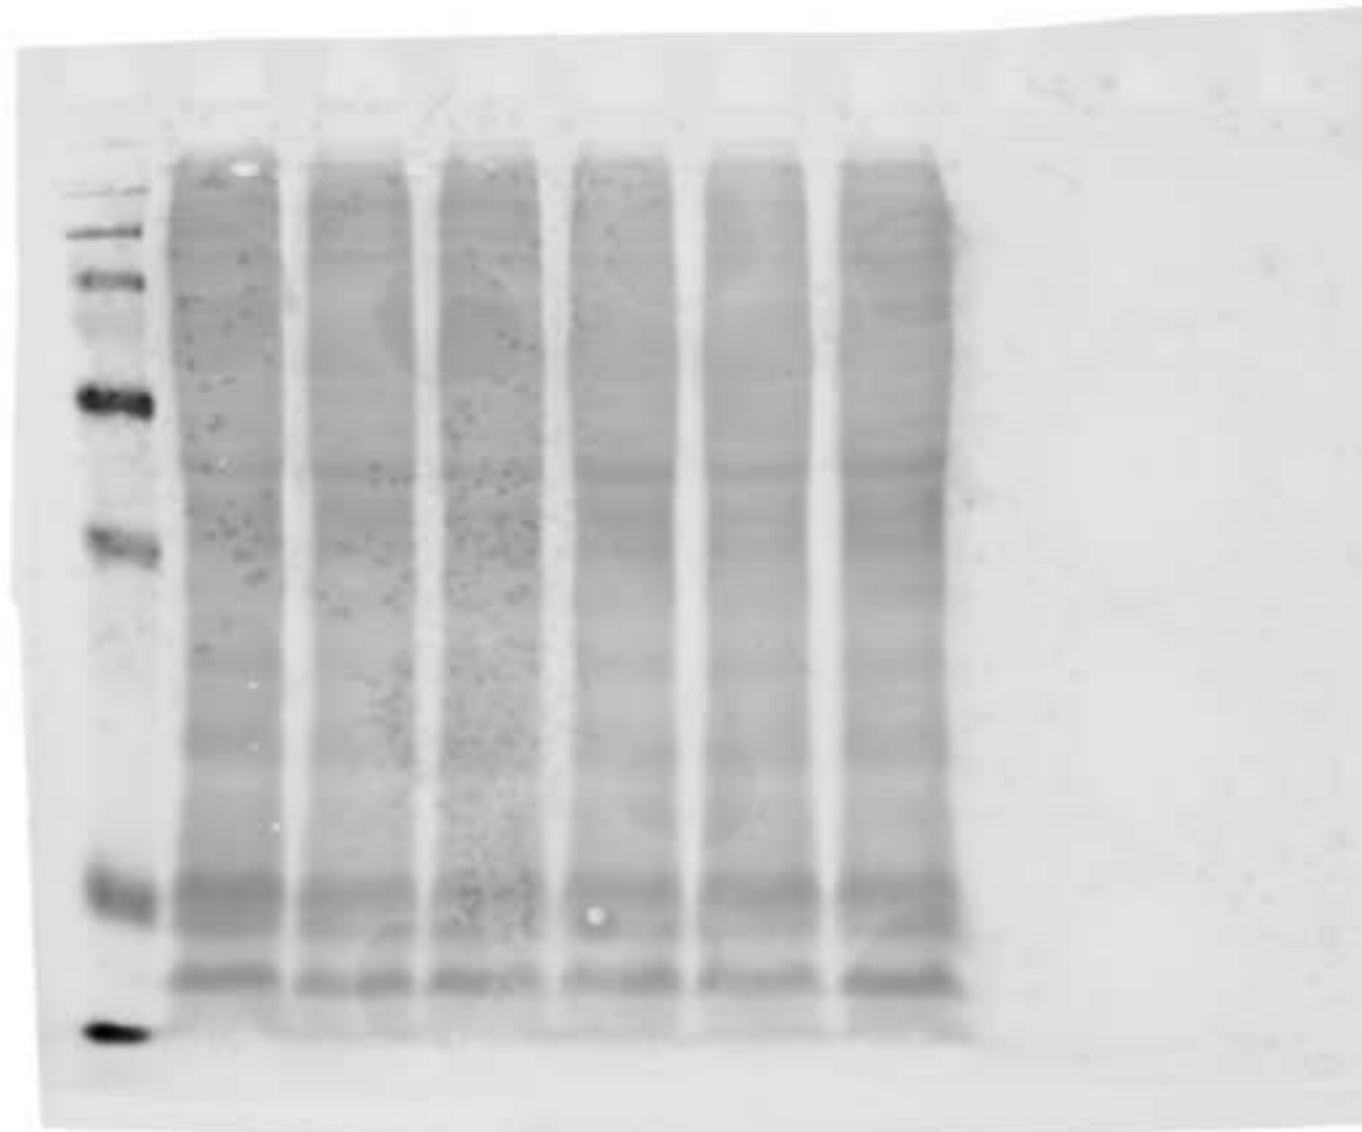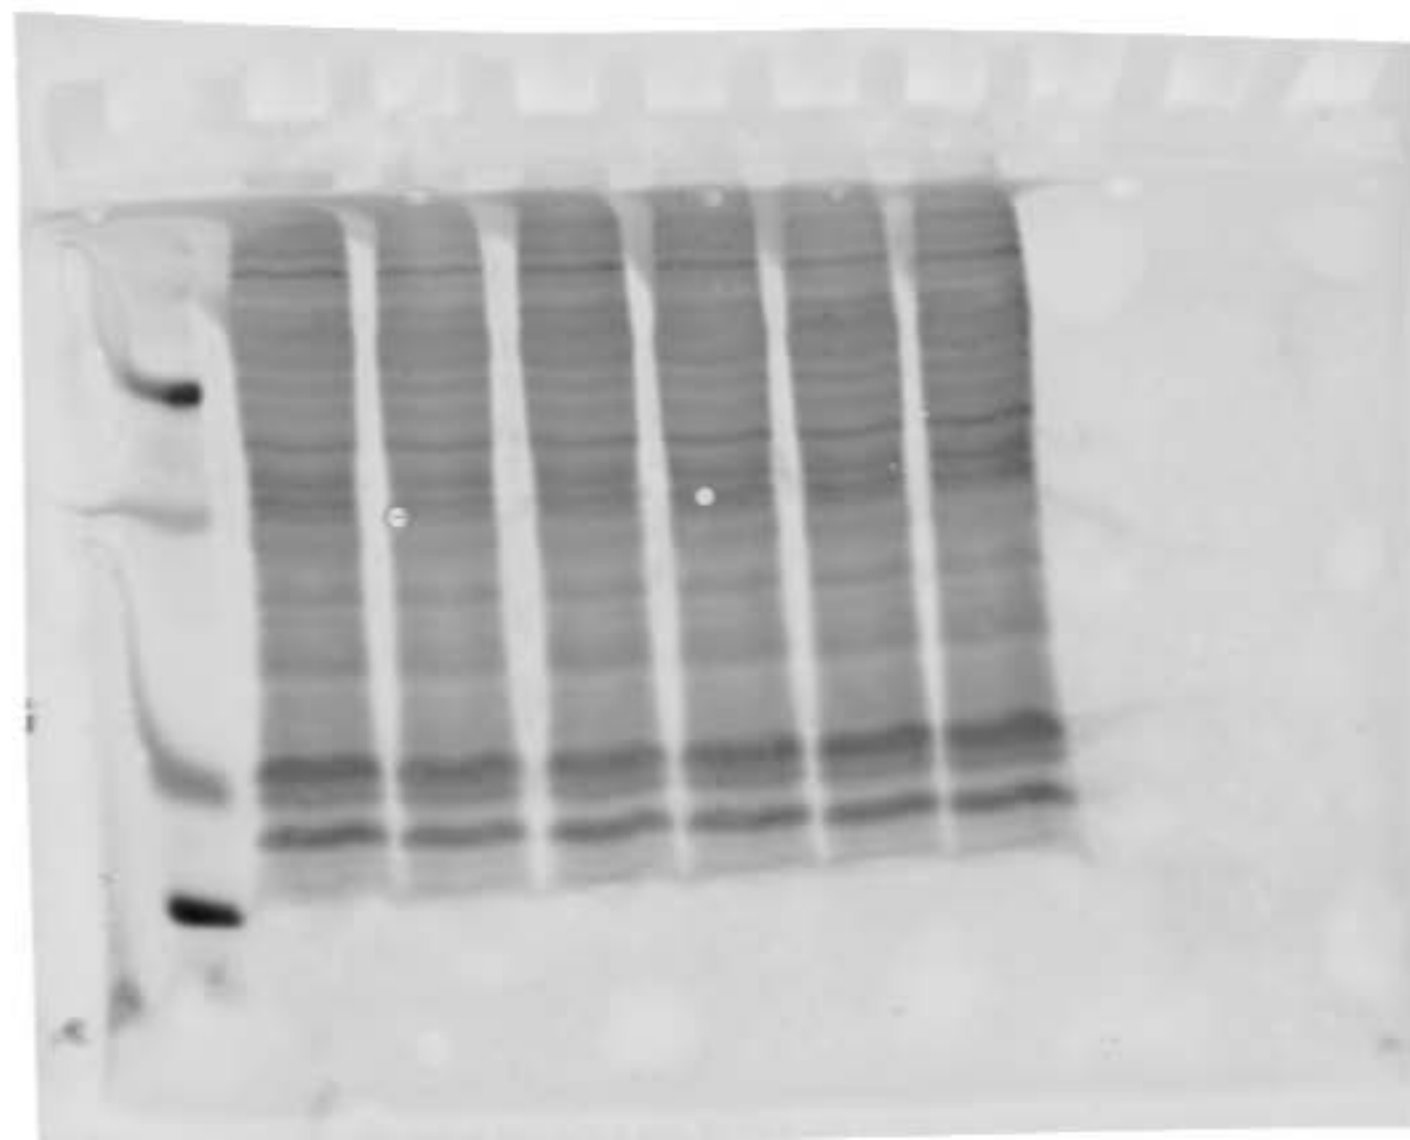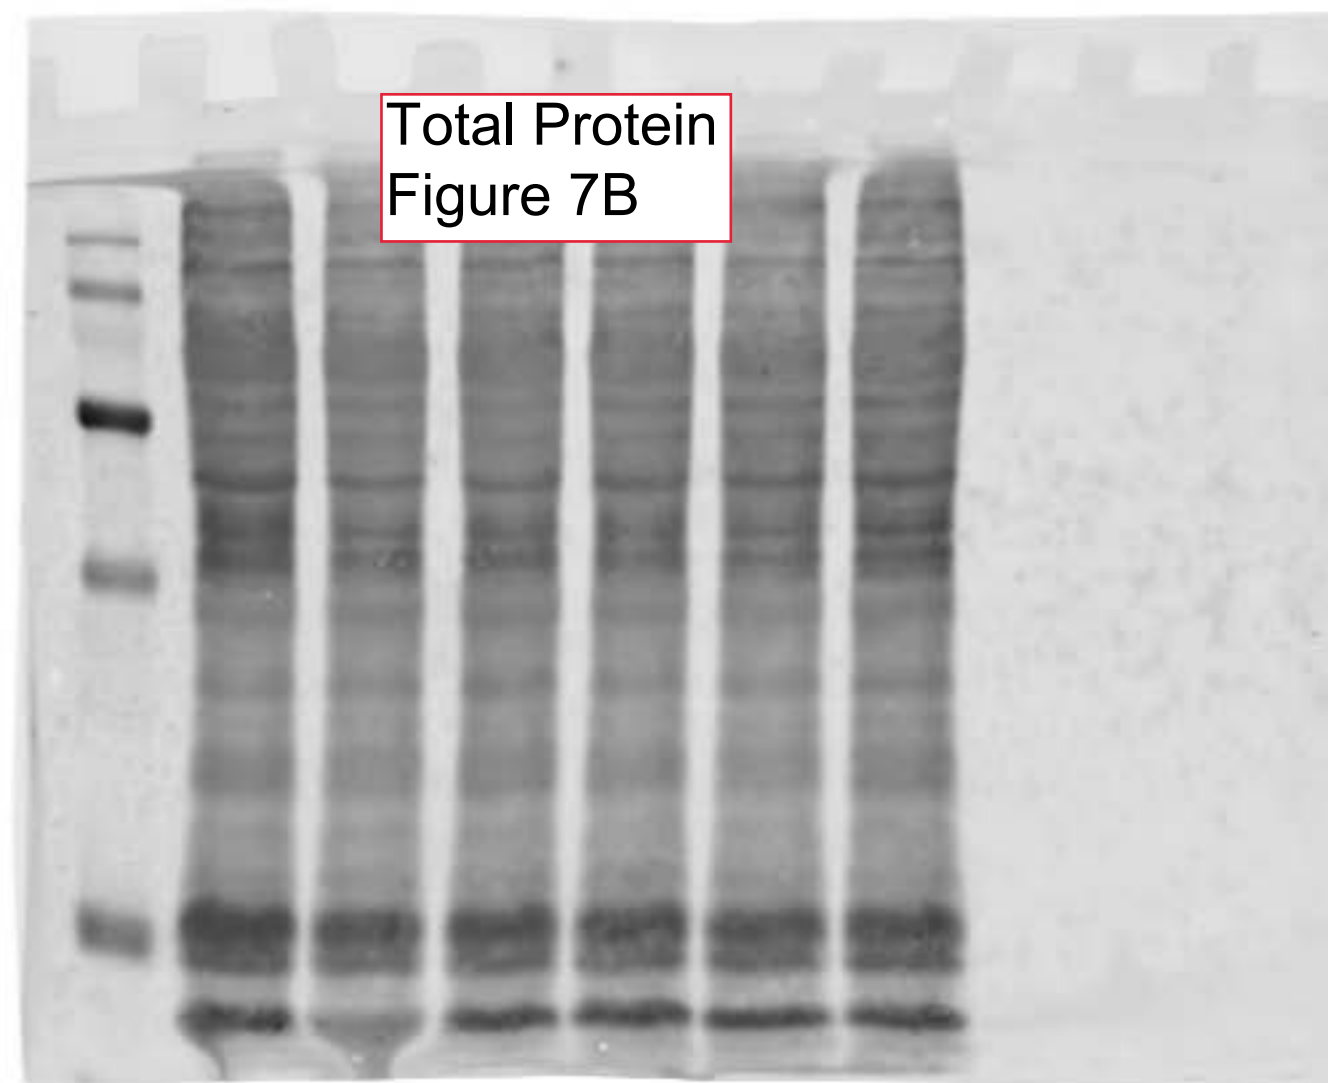

Total Protein  
Figure 7B

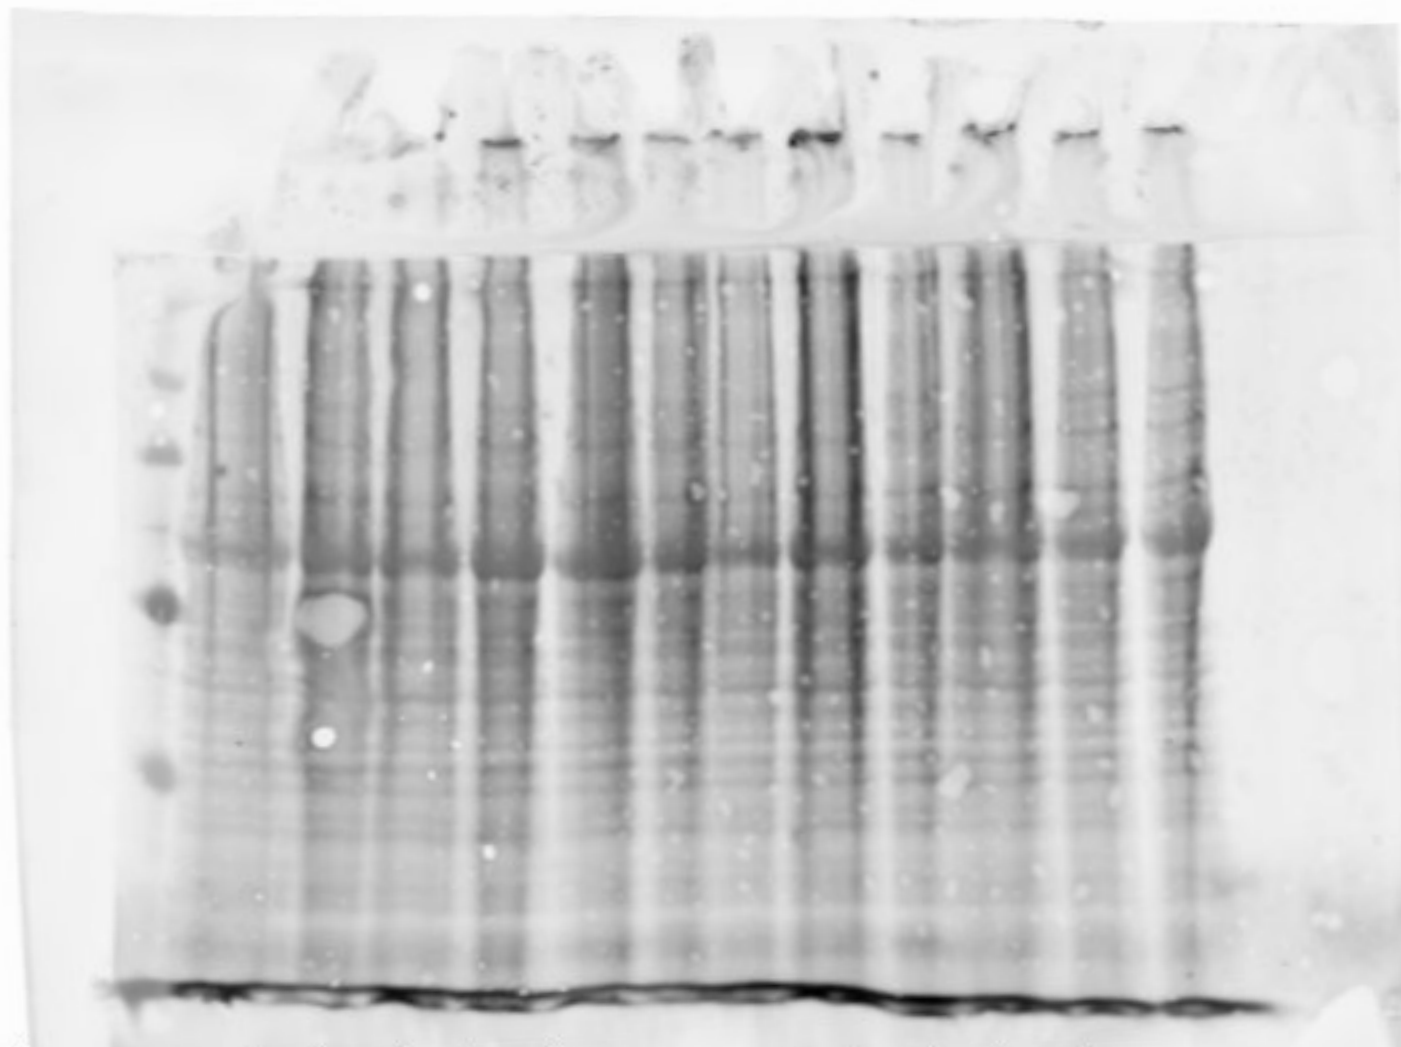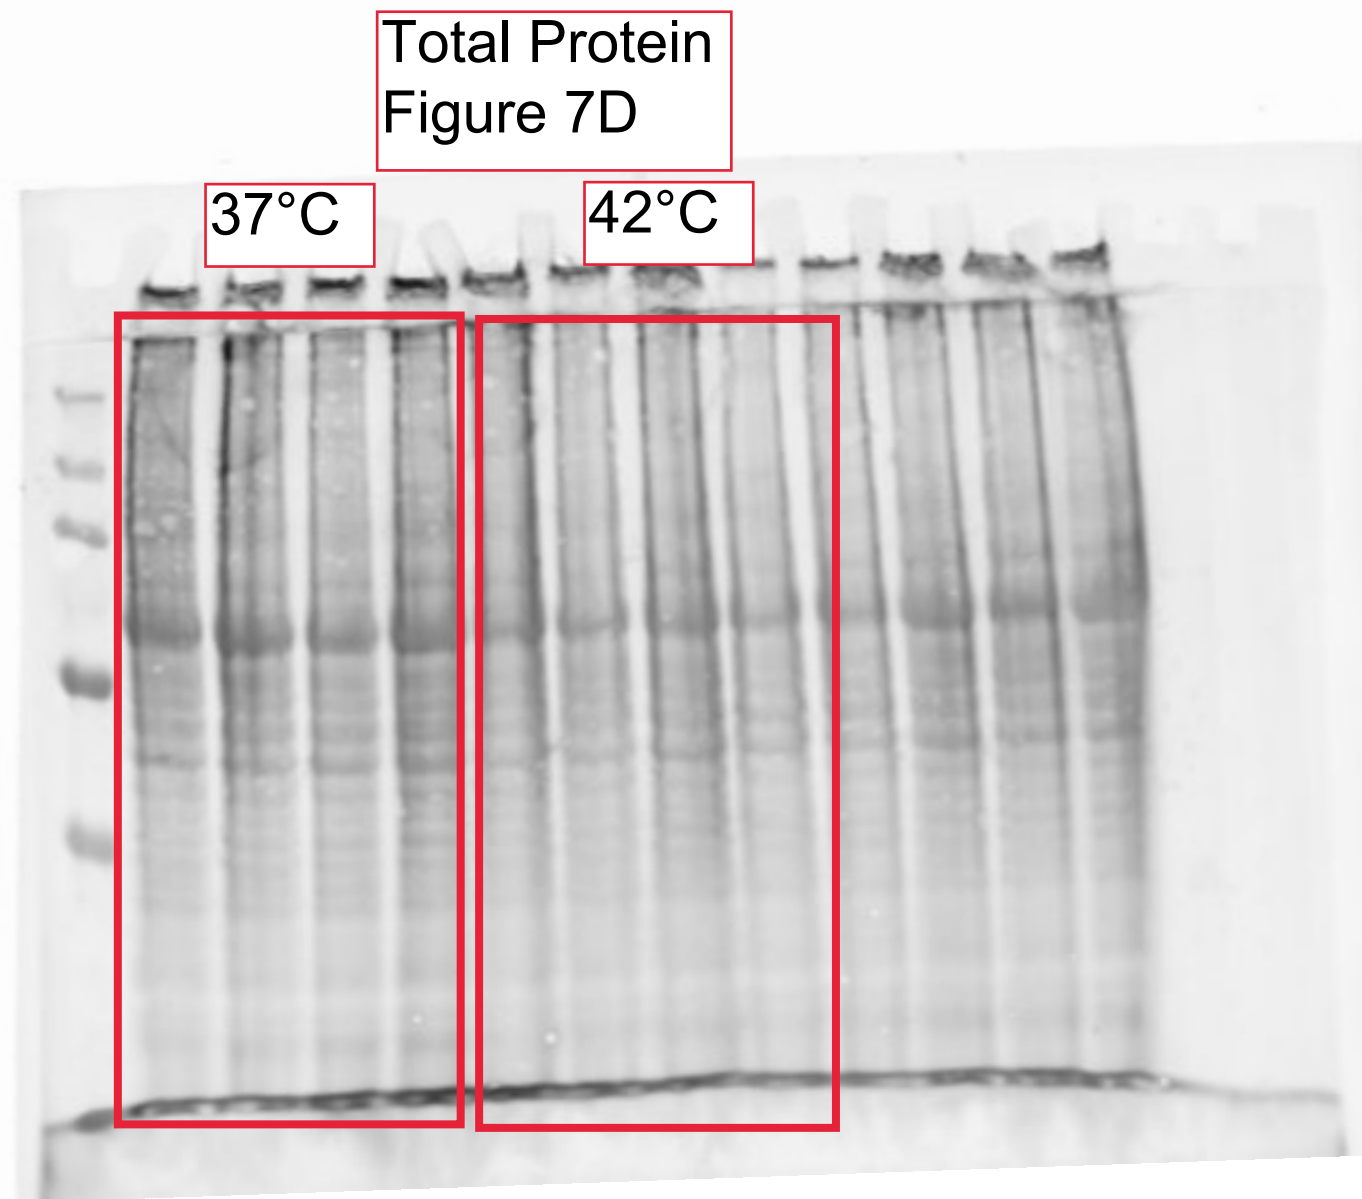

Supplement: 41598_2023_48769_MOESM1_ESM.pdf [file 41598_2023_48769_MOESM1_ESM.pdf]
